# Supplementary material for: Functionalized heterocycle-appended porphyrins: catalysis matters
Source: Royal Society of Chemistry journal article supplement (doi:10.1039/d0ra08603g), 2020-01-01
Supplement: d0ra08603g1.pdf [file d0ra08603g1.pdf]

## Electronic supplementary materials

*RSC Advances*, 2020,

### Functionalized heterocycle-appended porphyrins: catalysis matters

*Inna A. Abdulaeva, Kirill P. Birin, Daria A. Polivanovskaia,  
Yulia G. Gorbunova, Aslan Yu. Tsivadze*

#### CONTENTS

|                                                                     |    |
|---------------------------------------------------------------------|----|
| Spectral data of 3e.....                                            | 2  |
| Spectral data of <i>4-methoxycarbonylphenyl pinacolborane</i> ..... | 3  |
| Spectral data of 4a.....                                            | 5  |
| Spectral data of 4b .....                                           | 8  |
| Spectral data of 4c.....                                            | 11 |
| Spectral data of 4e.....                                            | 14 |
| Spectral data of 4f.....                                            | 17 |
| Spectral data of 4g .....                                           | 20 |
| Spectral data of 4h .....                                           | 23 |
| Spectral data of 5a.....                                            | 26 |
| Spectral data of 5b .....                                           | 29 |
| Spectral data of 5c.....                                            | 32 |
| Spectral data of 5e.....                                            | 35 |
| Spectral data of 5f.....                                            | 38 |
| Spectral data of 5g .....                                           | 41 |
| Spectral data of 5h .....                                           | 45 |
| Spectral data of 6 .....                                            | 48 |
| Spectral data of 8g .....                                           | 51 |
| Spectral data of 9 .....                                            | 54 |
| Spectral data of 10 .....                                           | 57 |
| Spectral data of 11 .....                                           | 60 |

## Spectral data of 3e

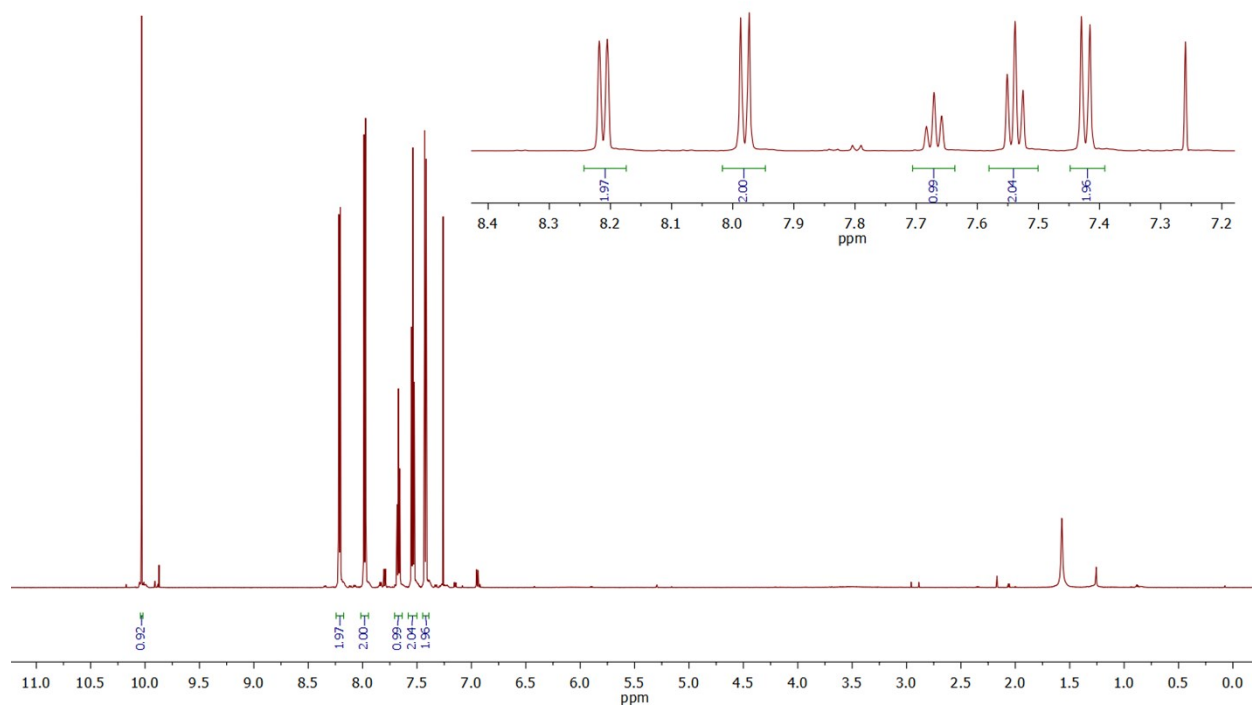

Figure S 1.  $^1\text{H-NMR}$  spectrum of 3e ( $\text{CDCl}_3$ ).

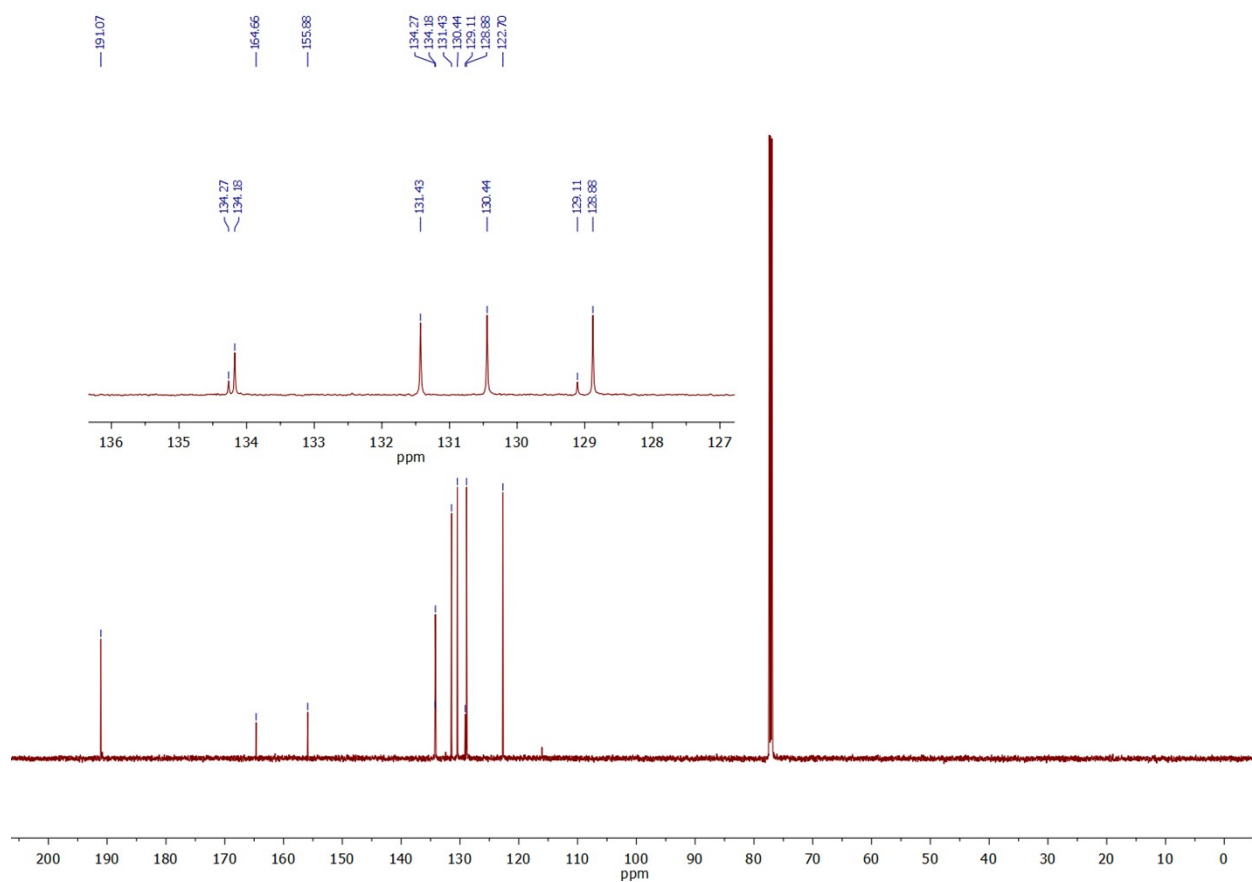

Figure S 2.  $^{13}\text{C-NMR}$  spectrum of 3e ( $\text{CDCl}_3$ ).

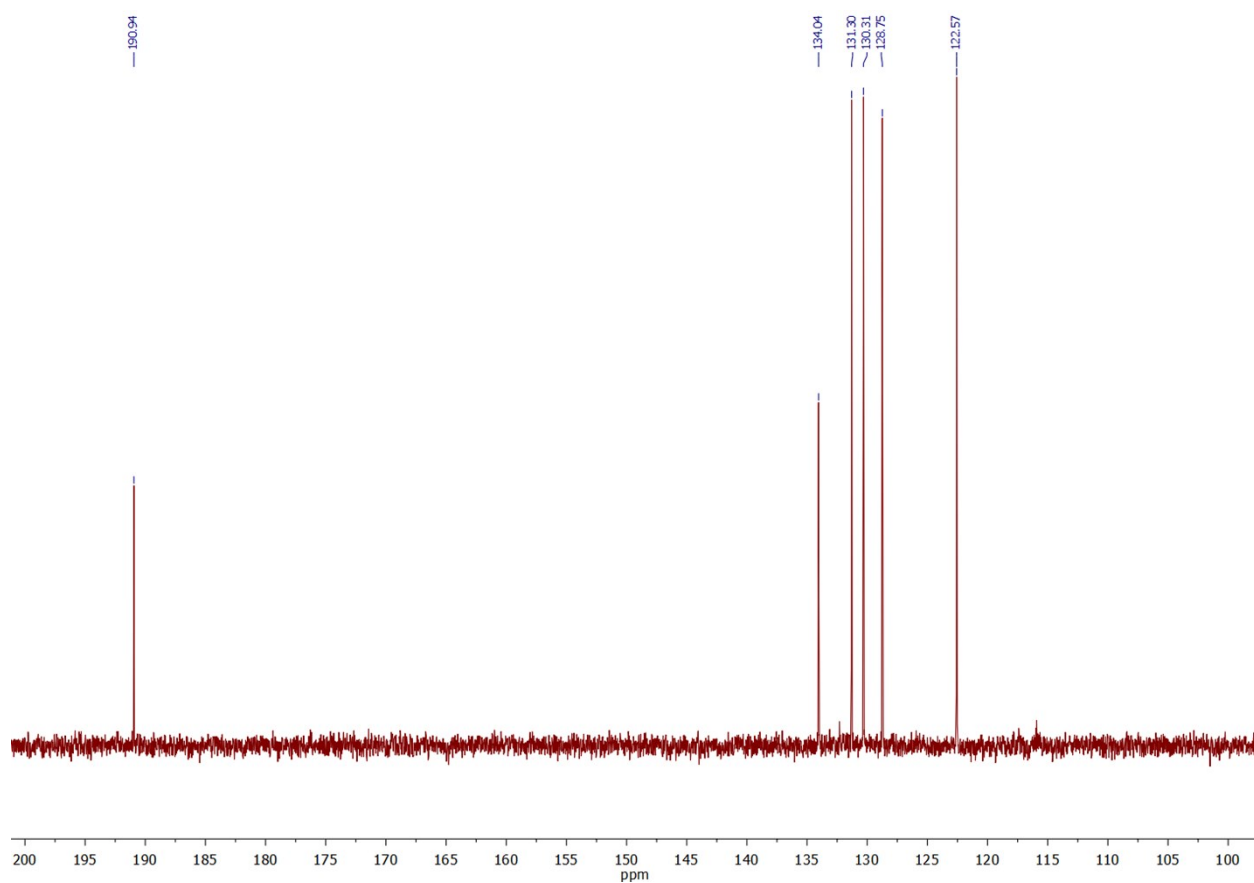

Figure S 3.  $^{13}\text{C}$  DEPT-135 spectrum of **3e** ( $\text{CDCl}_3$ ).

**Spectral data of 4-methoxycarbonylphenyl pinacolborane**

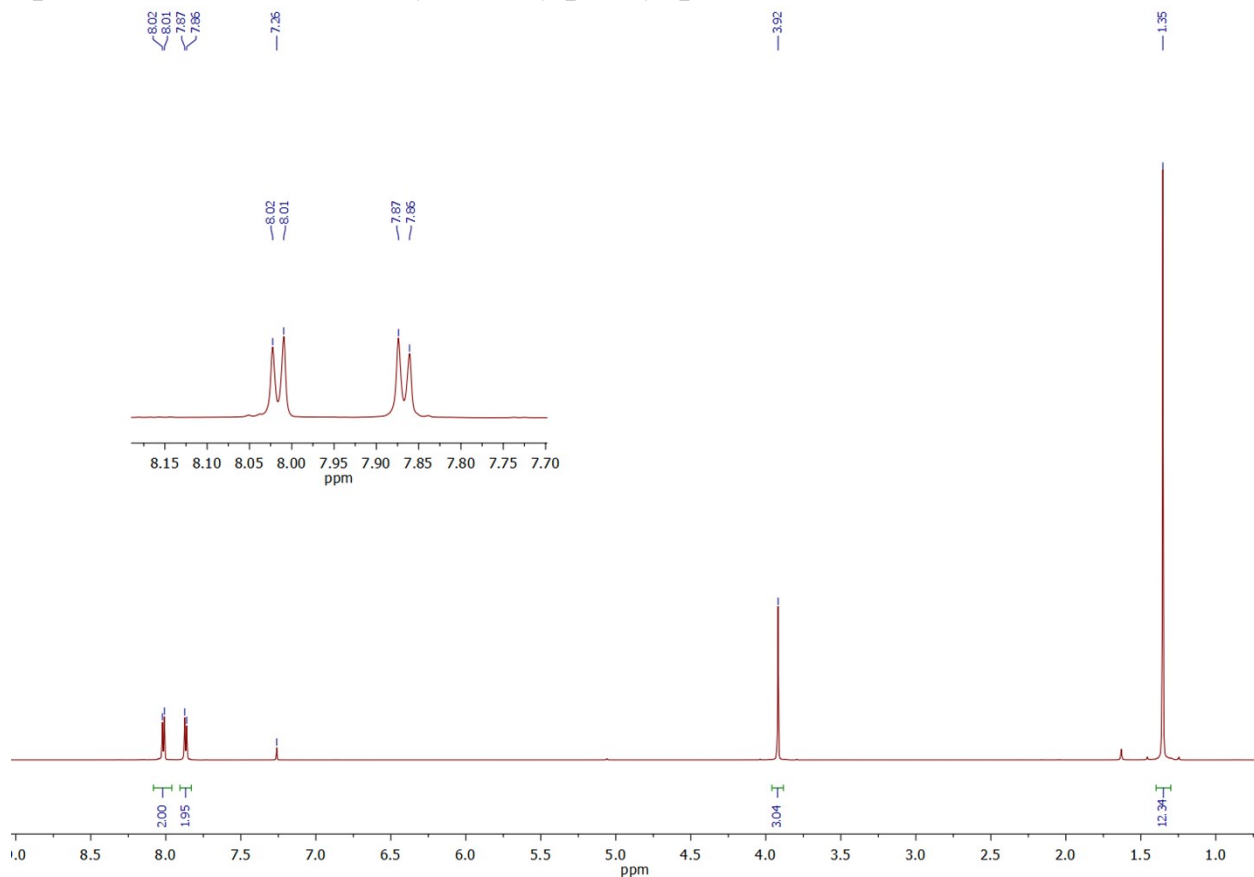

Figure S 4.  $^1\text{H}$ -NMR spectrum of 4-methoxycarbonylphenyl pinacolborane ( $\text{CDCl}_3$ ).

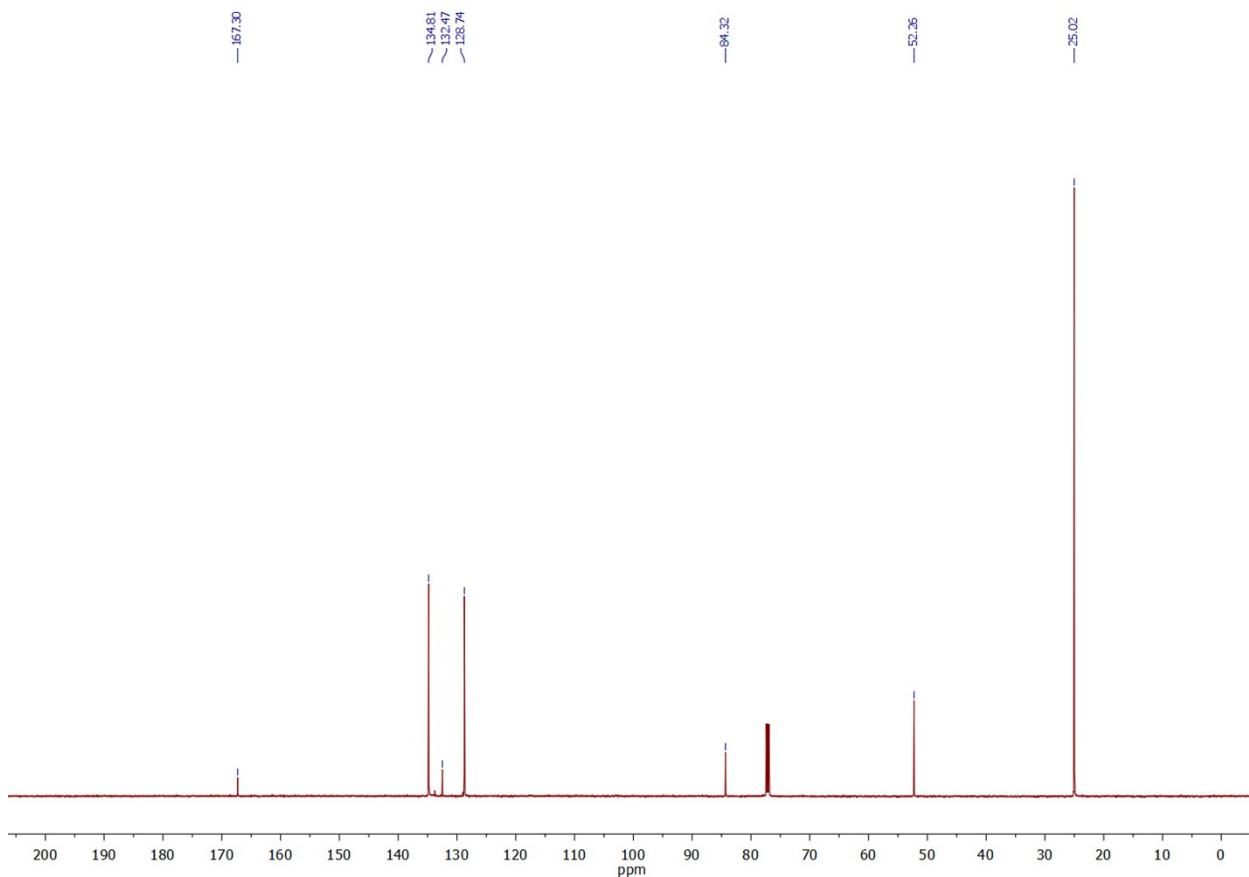

Figure S 5.  $^{13}\text{C}$ -NMR spectrum of 4-methoxycarbonylphenyl pinacolborane ( $\text{CDCl}_3$ ).

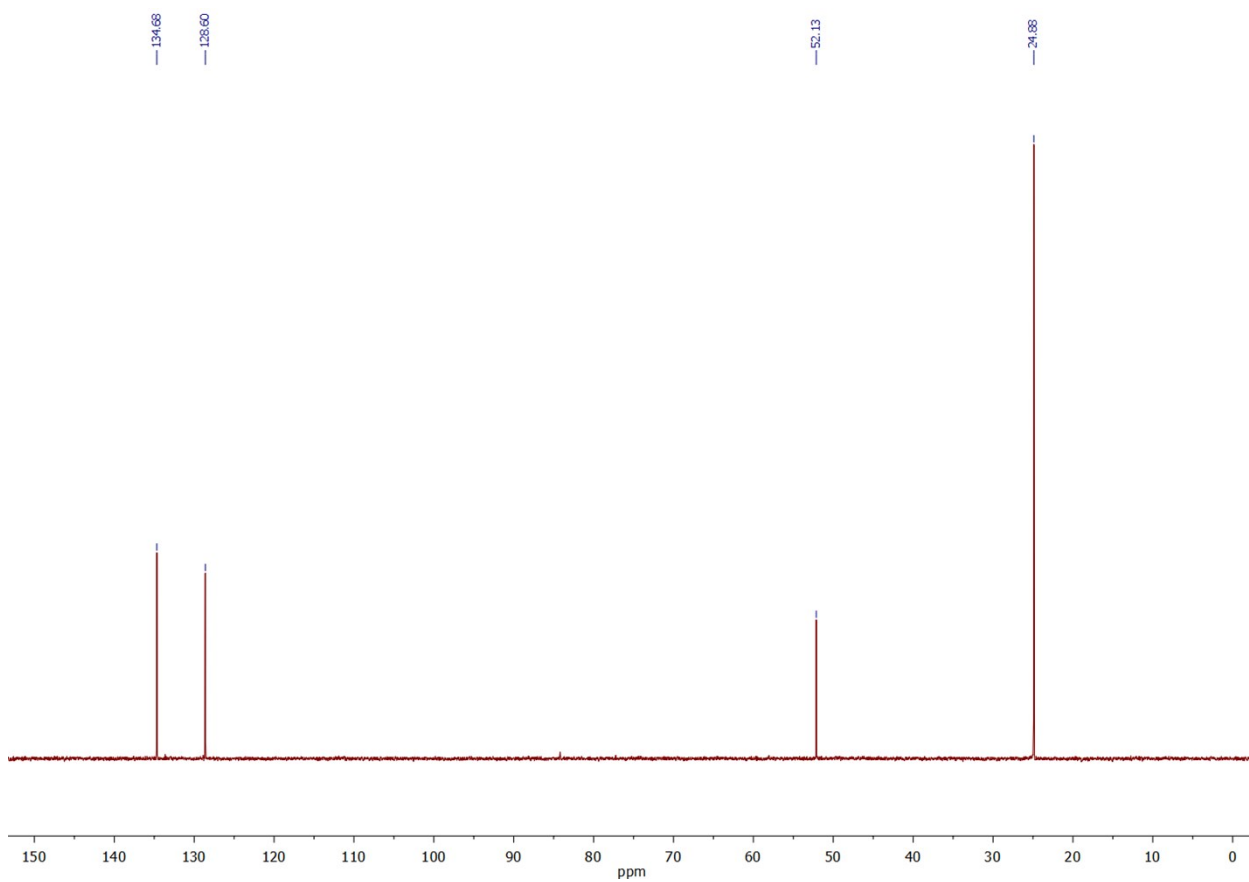

Figure S 6.  $^{13}\text{C}$  DEPT-135 spectrum of 4-methoxycarbonylphenyl pinacolborane ( $\text{CDCl}_3$ ).

## Spectral data of 4a

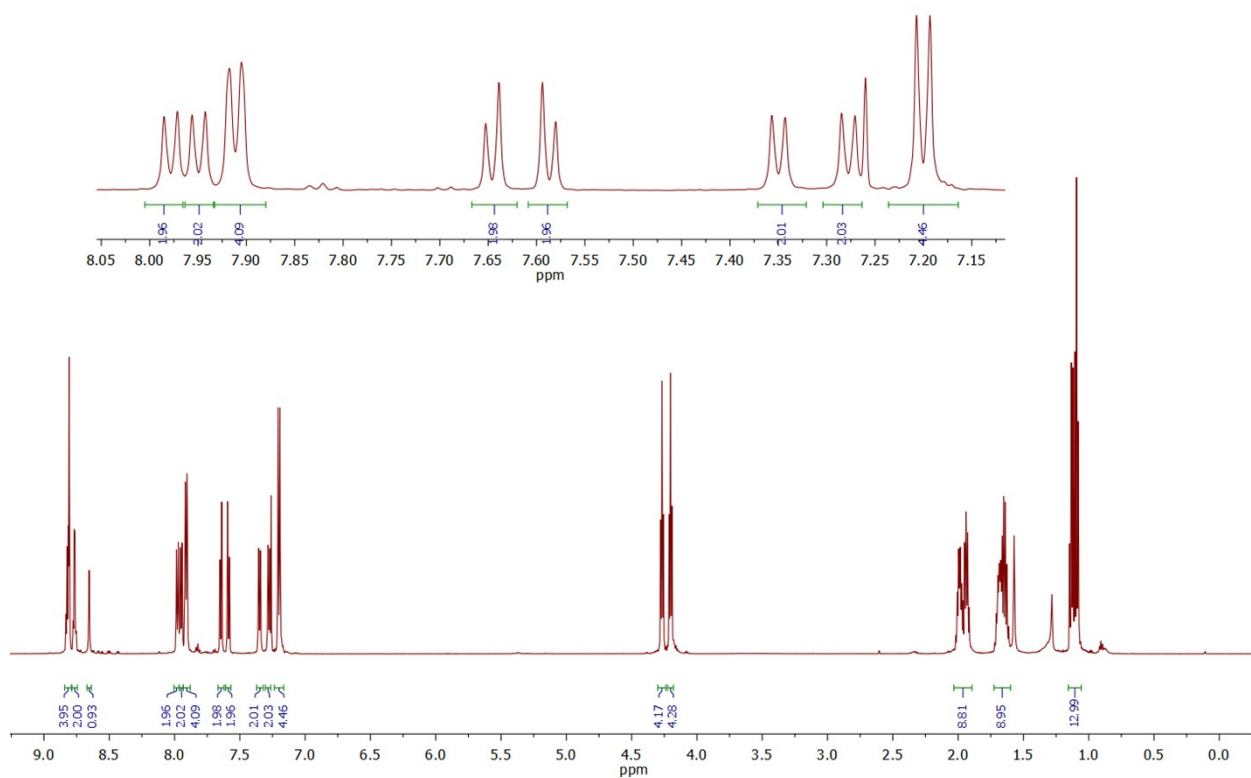

Figure S 7. <sup>1</sup>H-NMR spectrum of 4a (CDCl<sub>3</sub>).

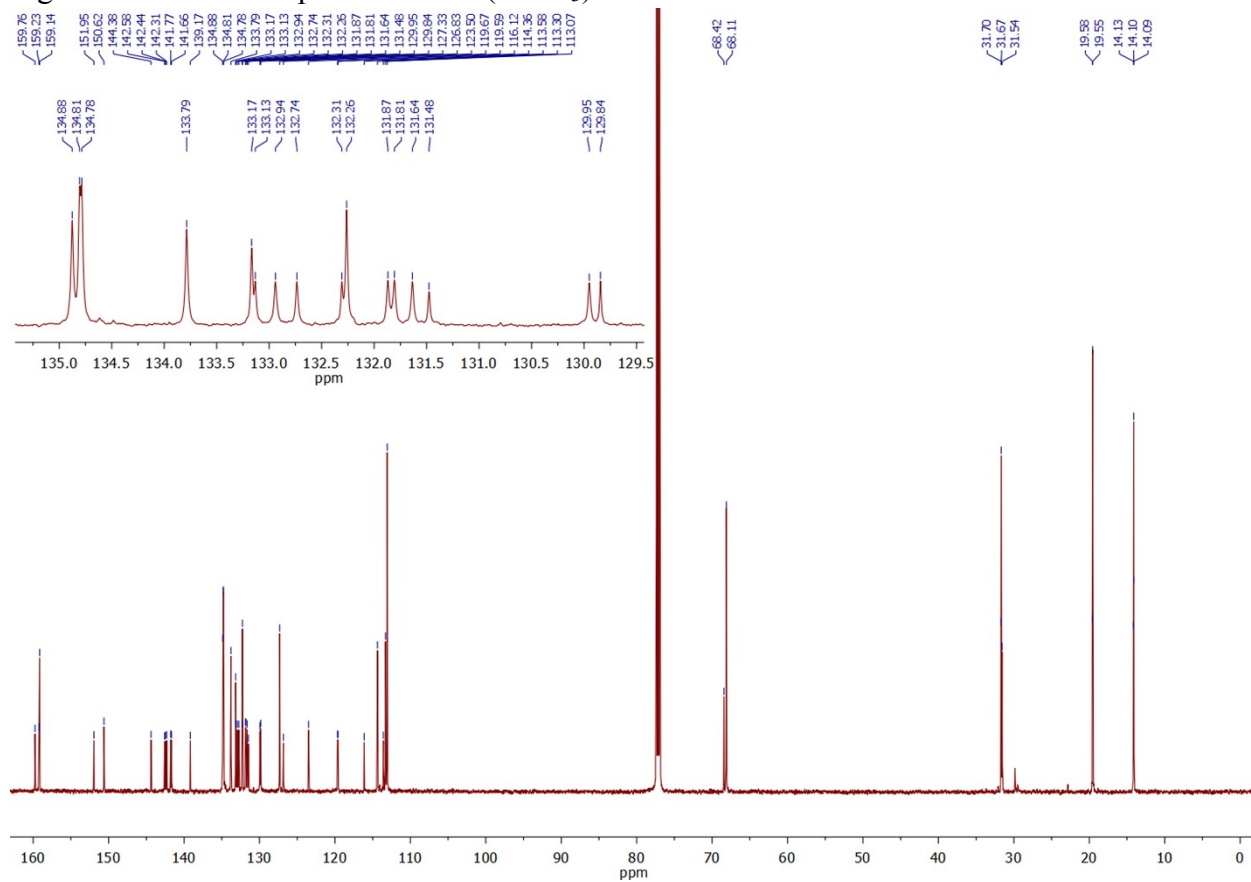

Figure S 8. <sup>13</sup>C-NMR spectrum of 4a (CDCl<sub>3</sub>).

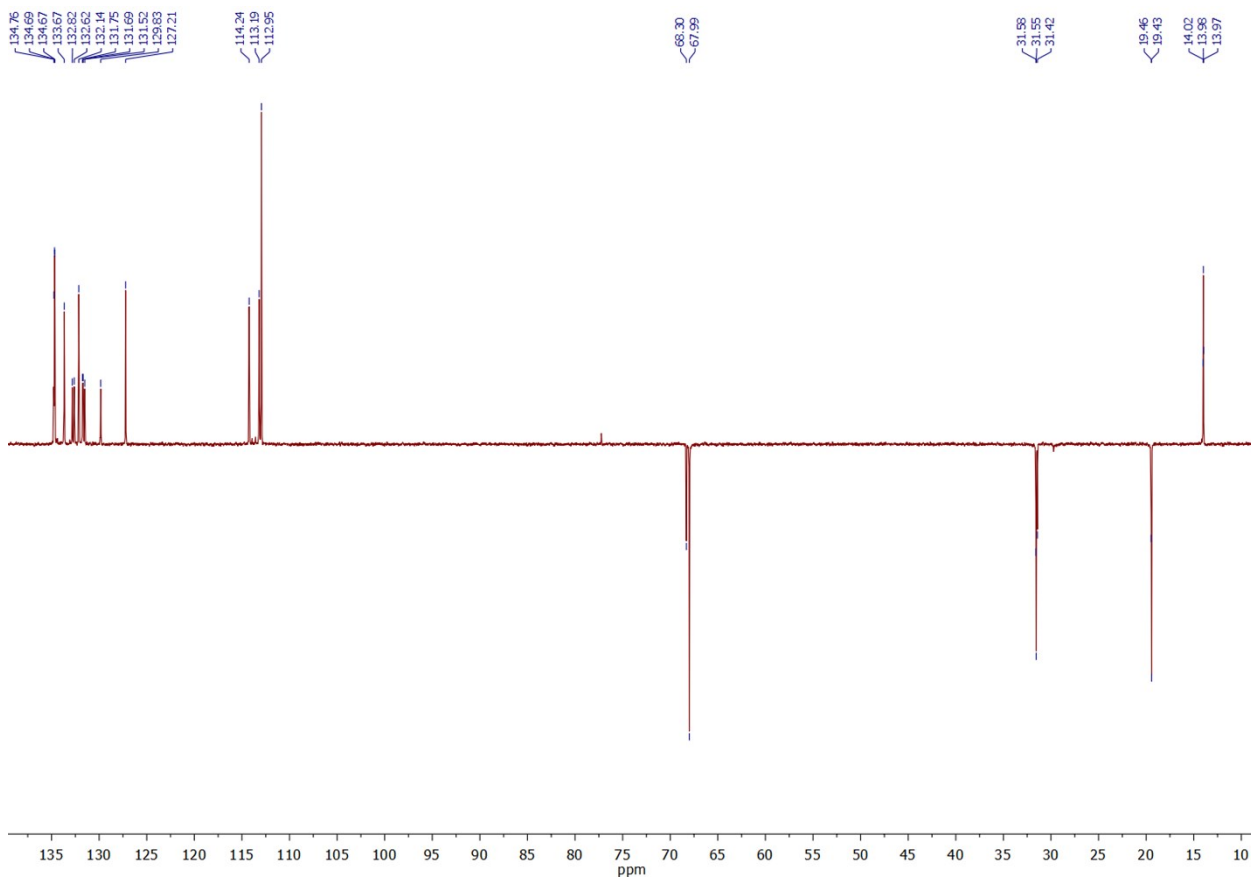

Figure S 9.  $^{13}\text{C}$  DEPT-135 spectrum of **4a** ( $\text{CDCl}_3$ ).

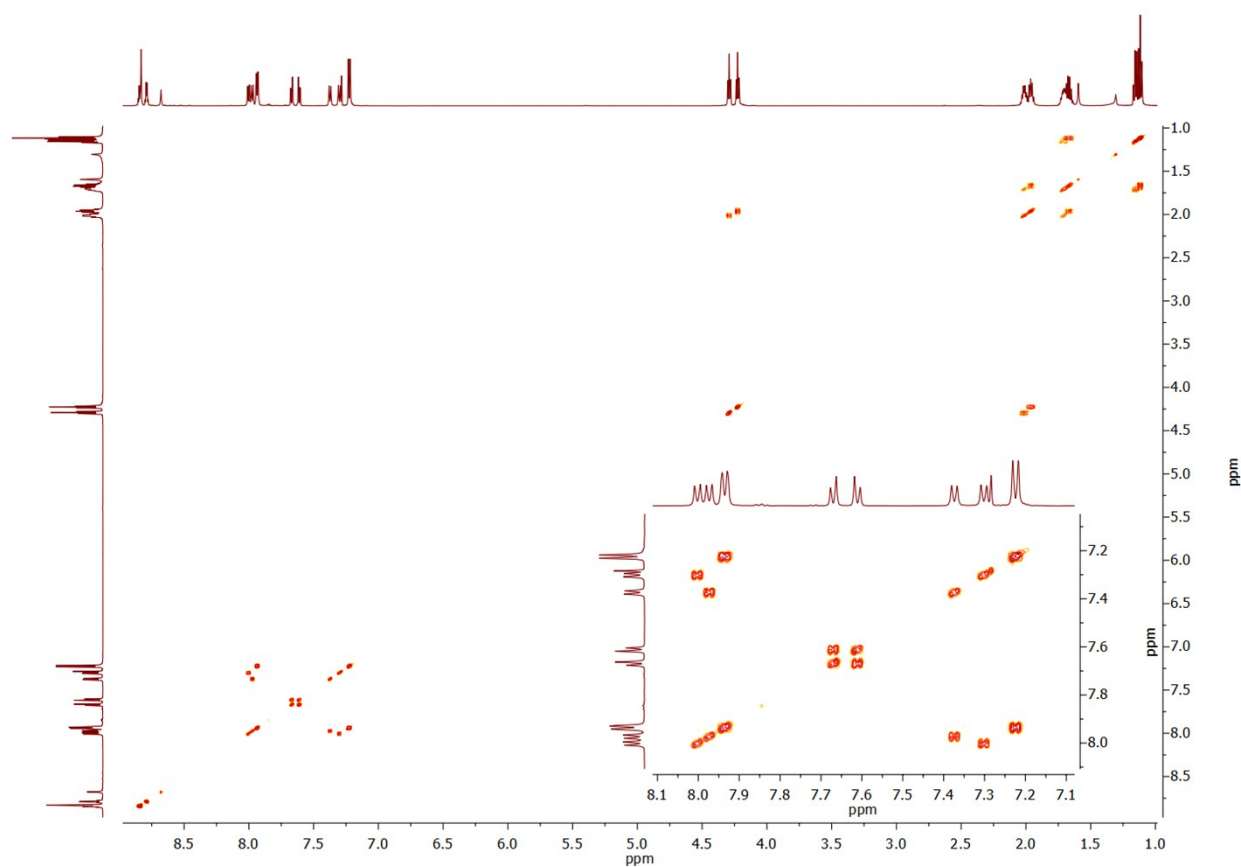

Figure S 10. COSY spectrum of **4a** ( $\text{CDCl}_3$ ).

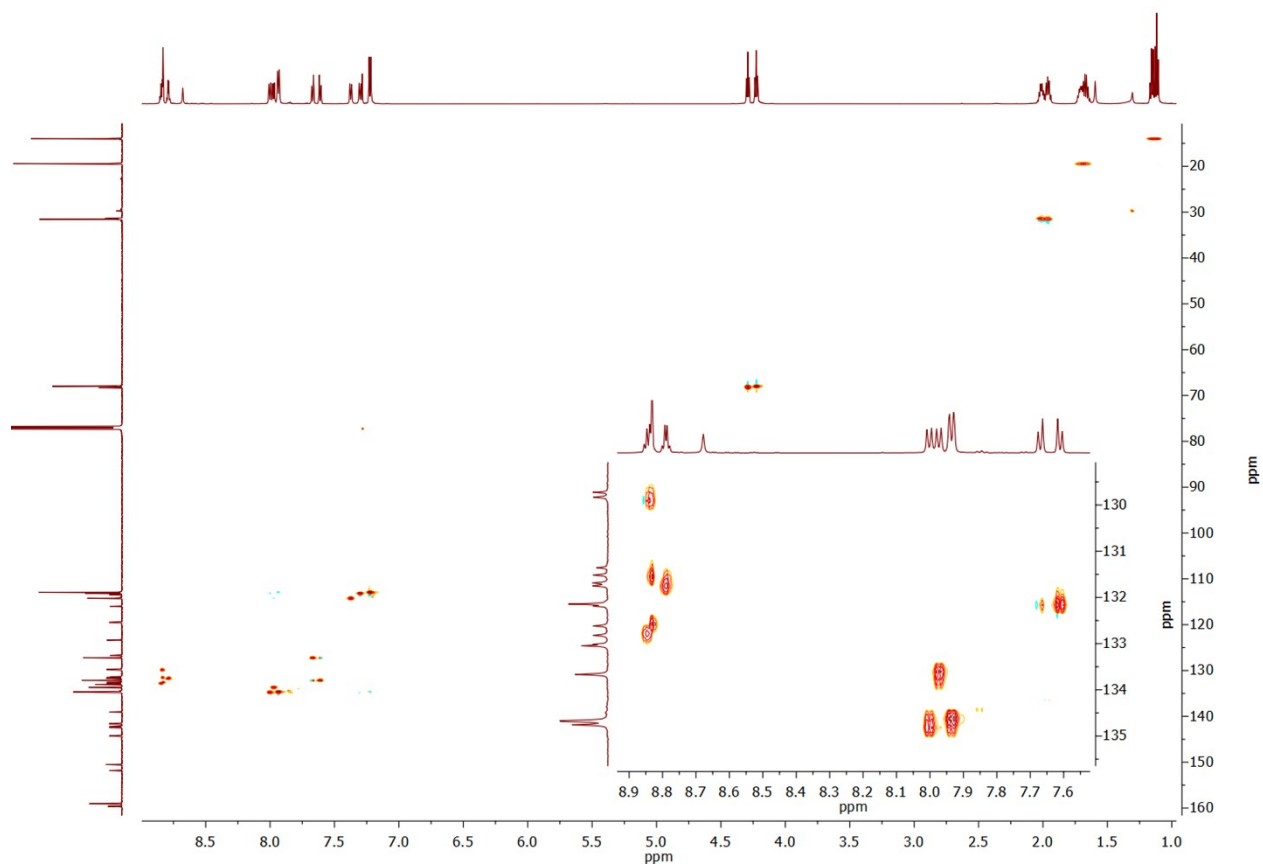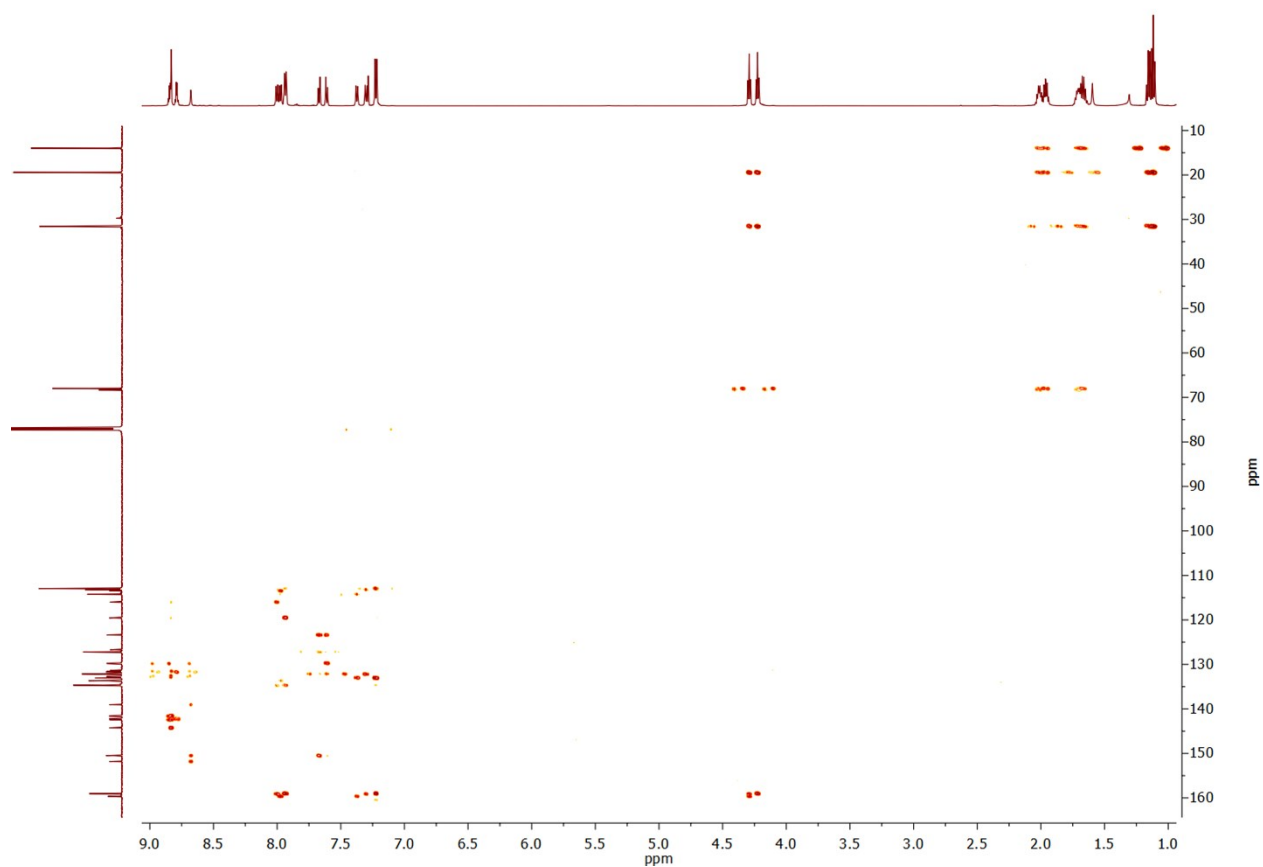

## Spectral data of 4b

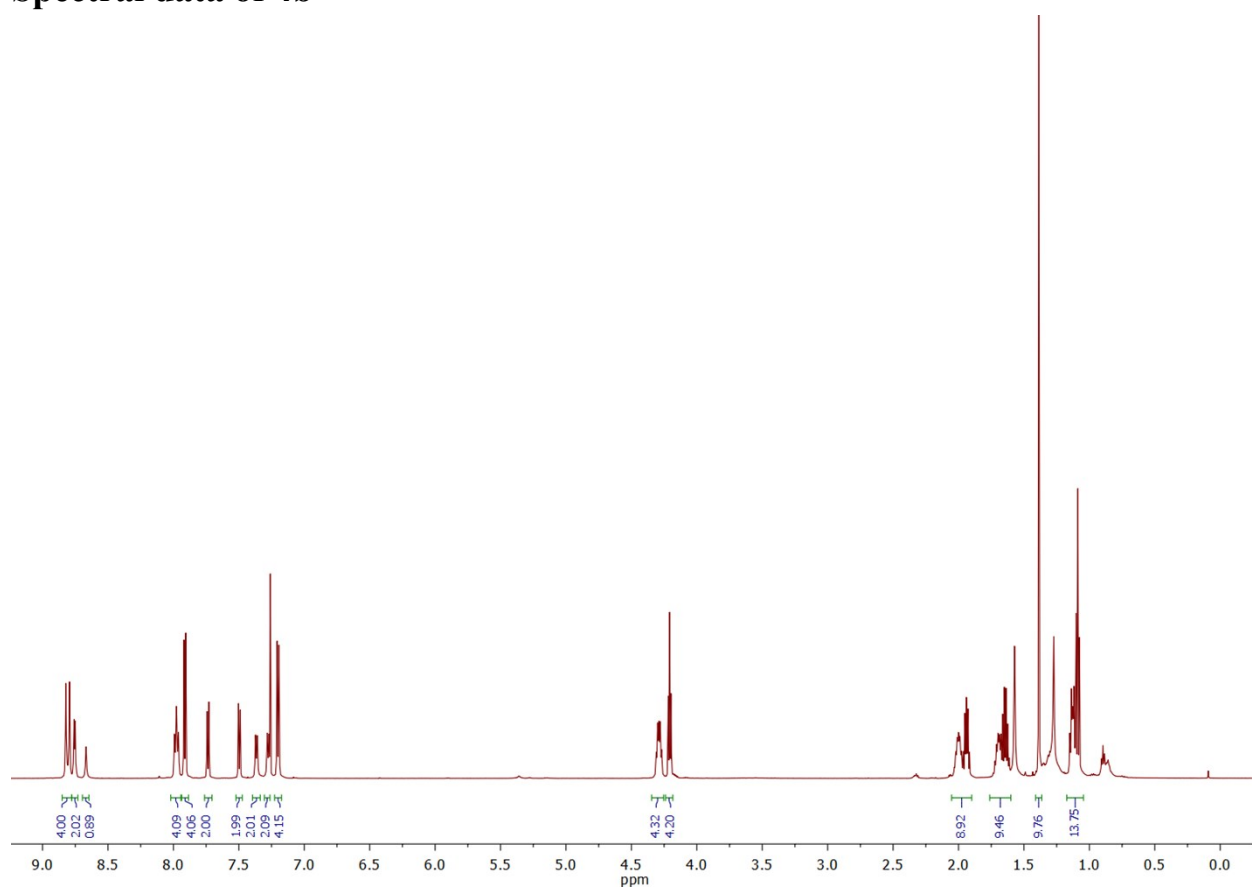

Figure S 13. <sup>1</sup>H-NMR spectrum of 4b (CDCl<sub>3</sub>).

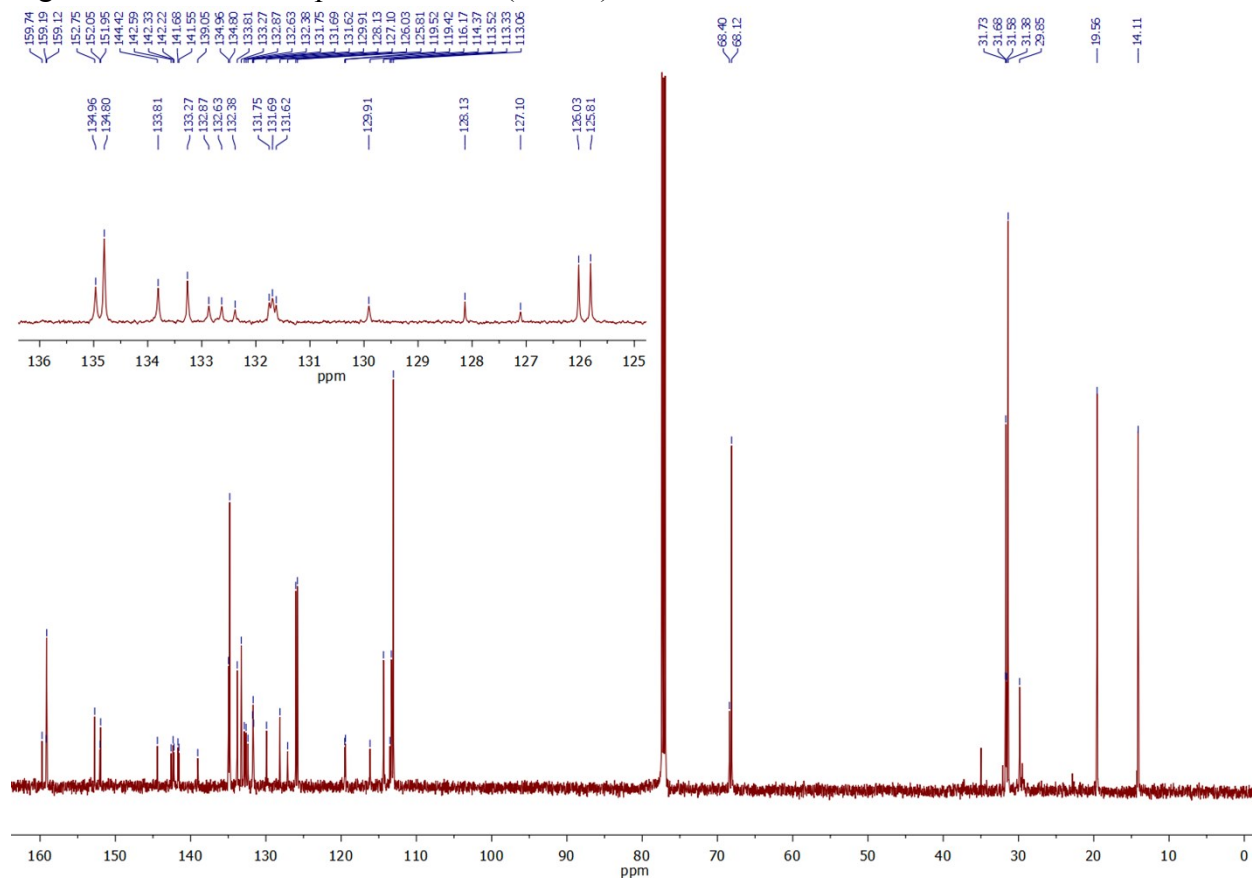

Figure S 14. <sup>13</sup>C-NMR spectrum of 4b (CDCl<sub>3</sub>).



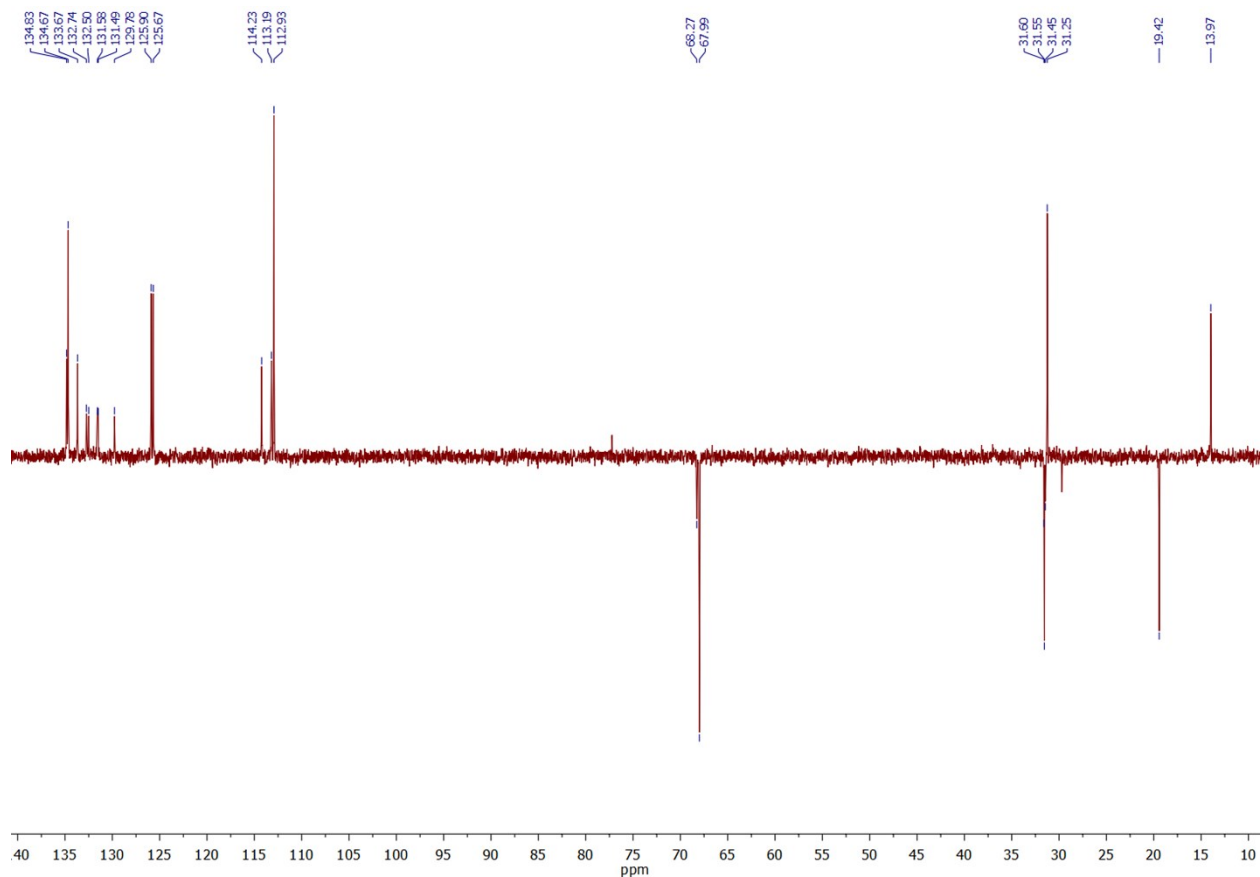

Figure S 15.  $^{13}\text{C}$  DEPT-135 spectrum of **4b** ( $\text{CDCl}_3$ ).

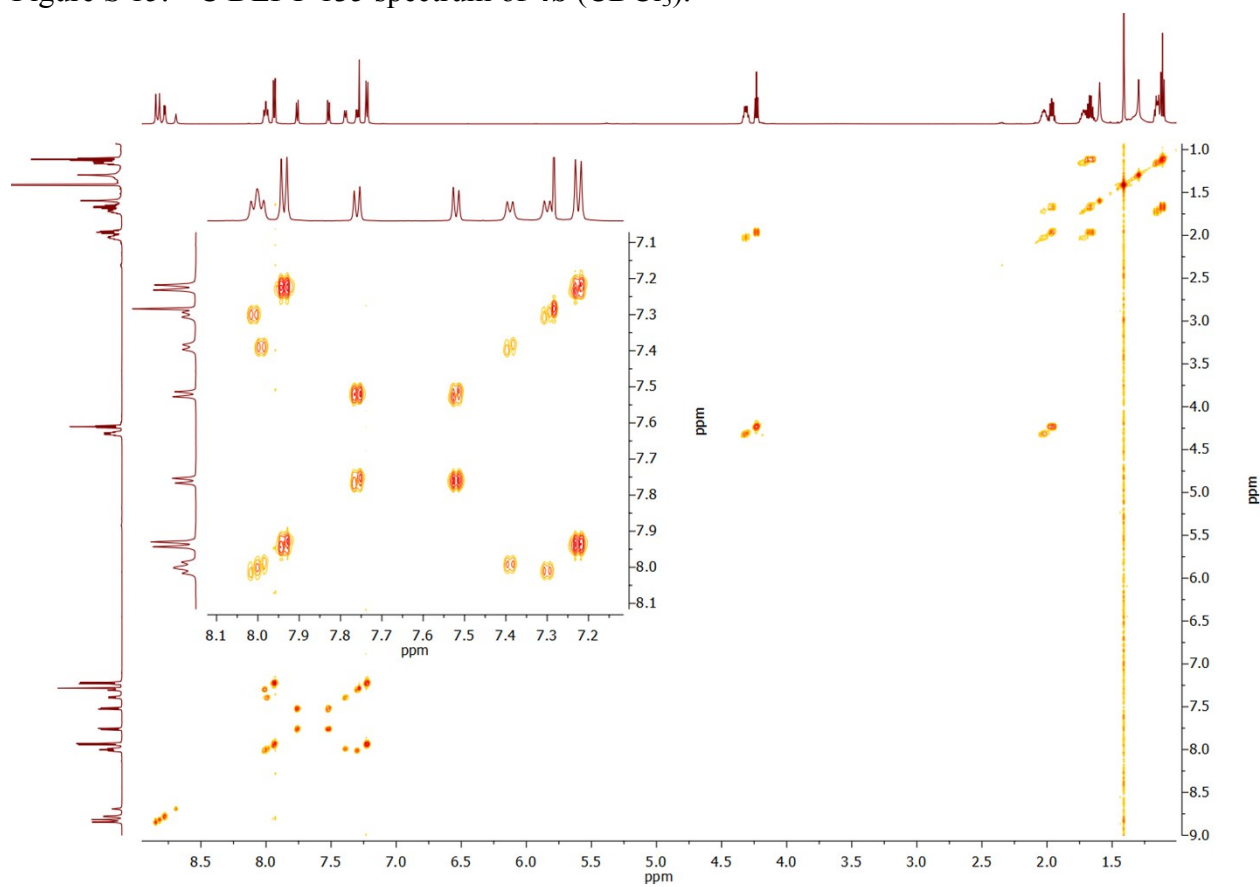

Figure S 16. COSY spectrum of **4b** ( $\text{CDCl}_3$ ).

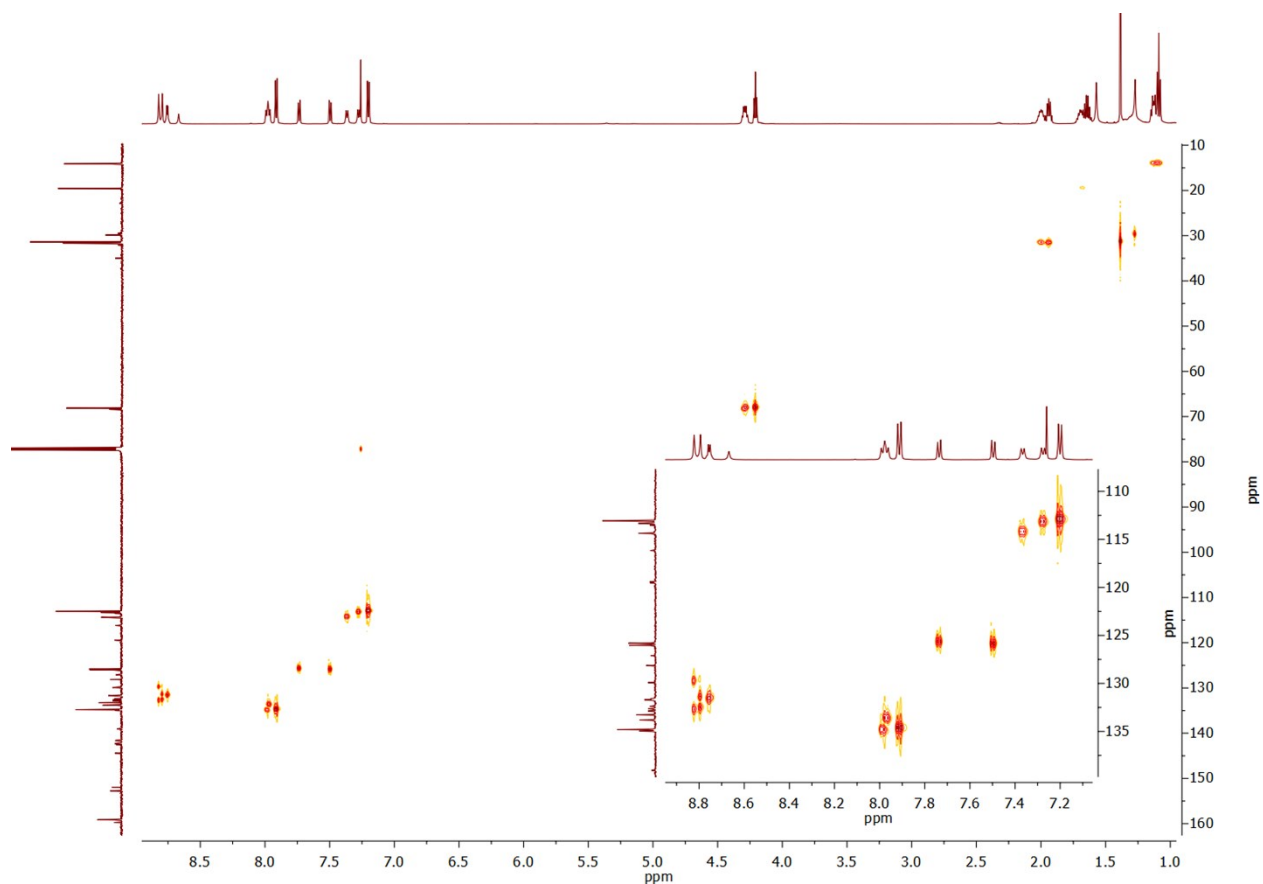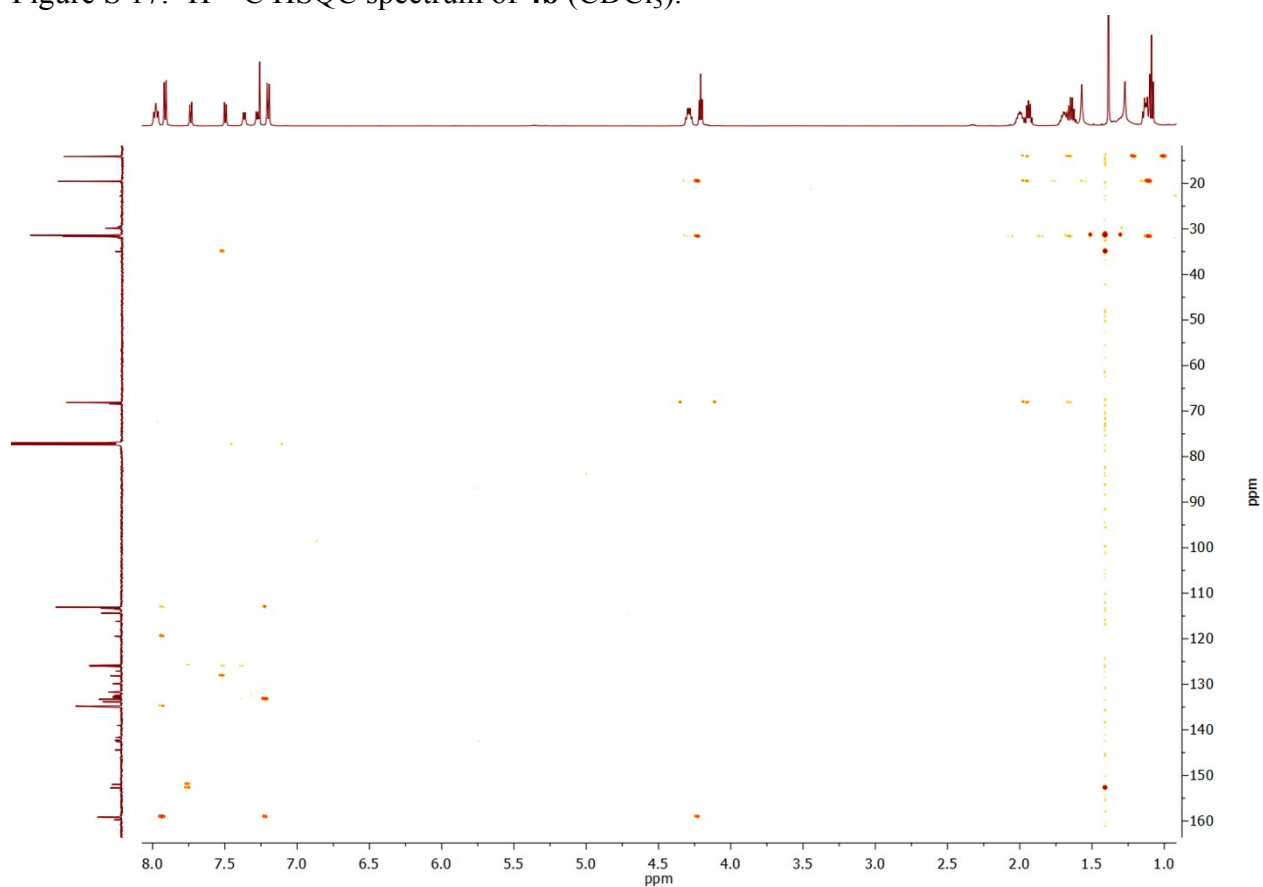

## Spectral data of 4c

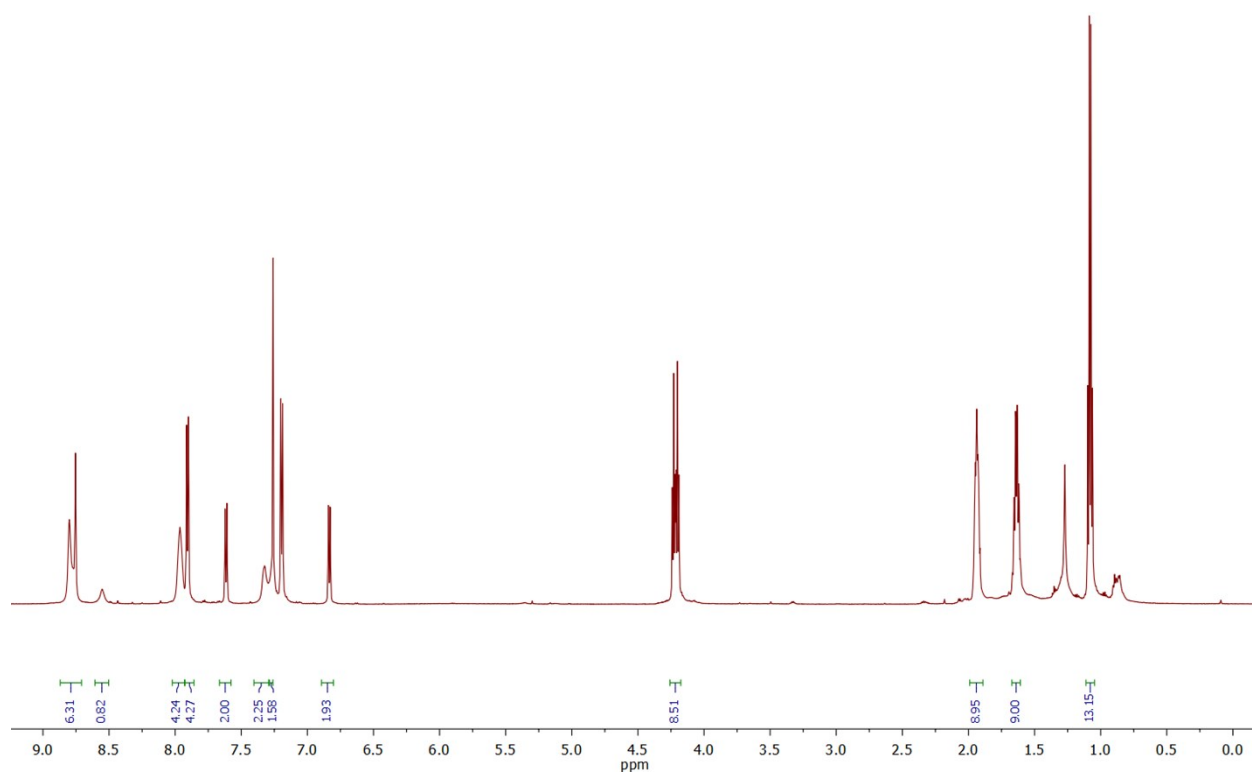

Figure S 19. <sup>1</sup>H-NMR spectrum of 4c (CDCl<sub>3</sub>).

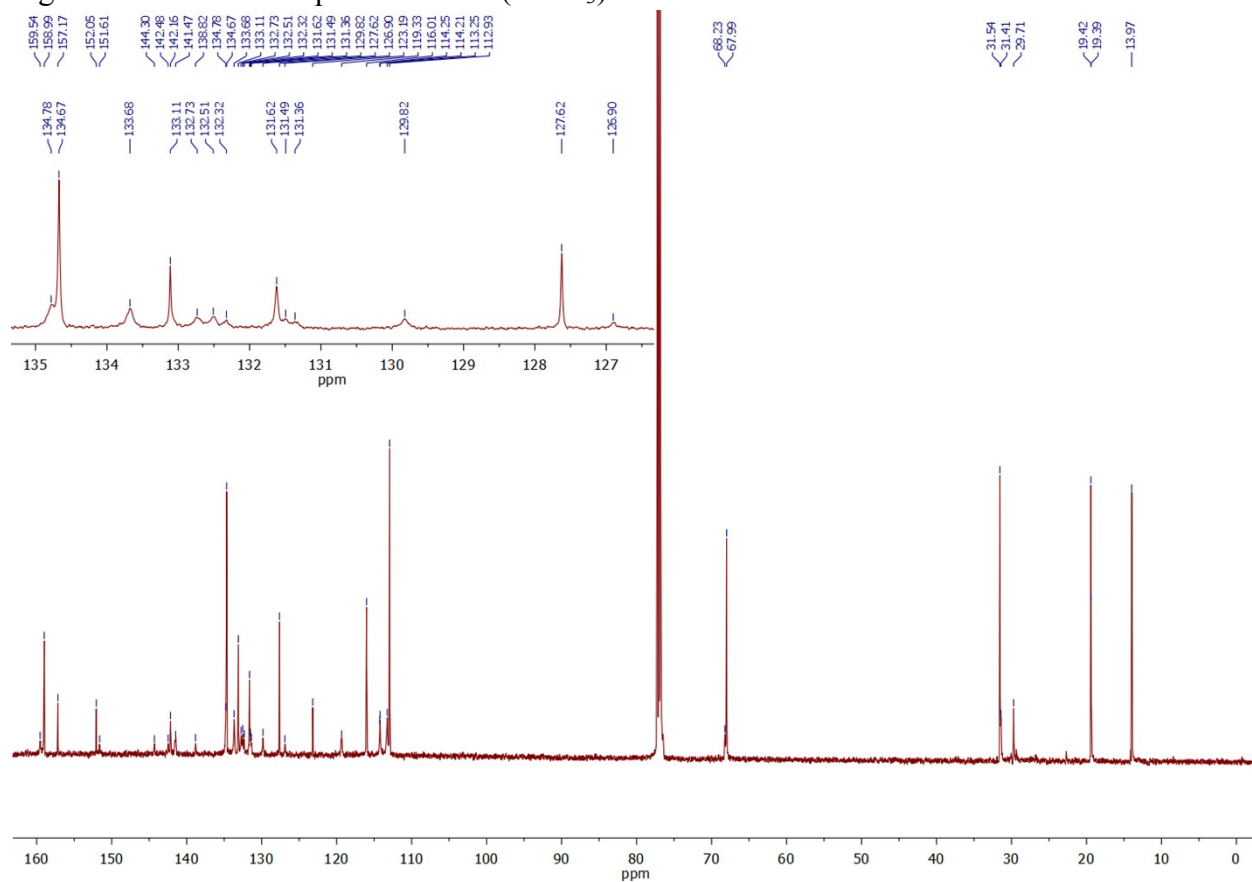

Figure S 20. <sup>13</sup>C-NMR spectrum of 4c (CDCl<sub>3</sub>).

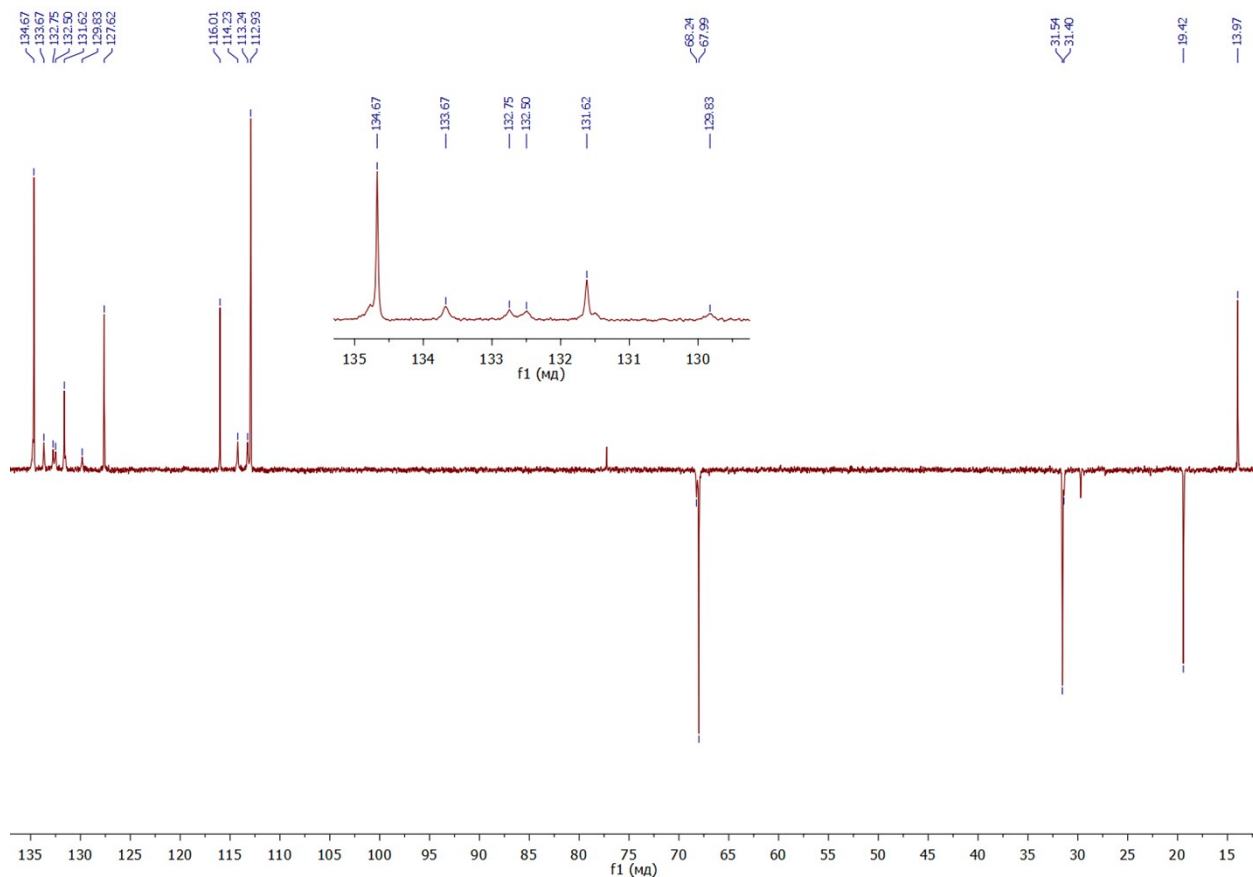

Figure S 21.  $^{13}\text{C}$  DEPT-135 spectrum of **4c** ( $\text{CDCl}_3$ ).

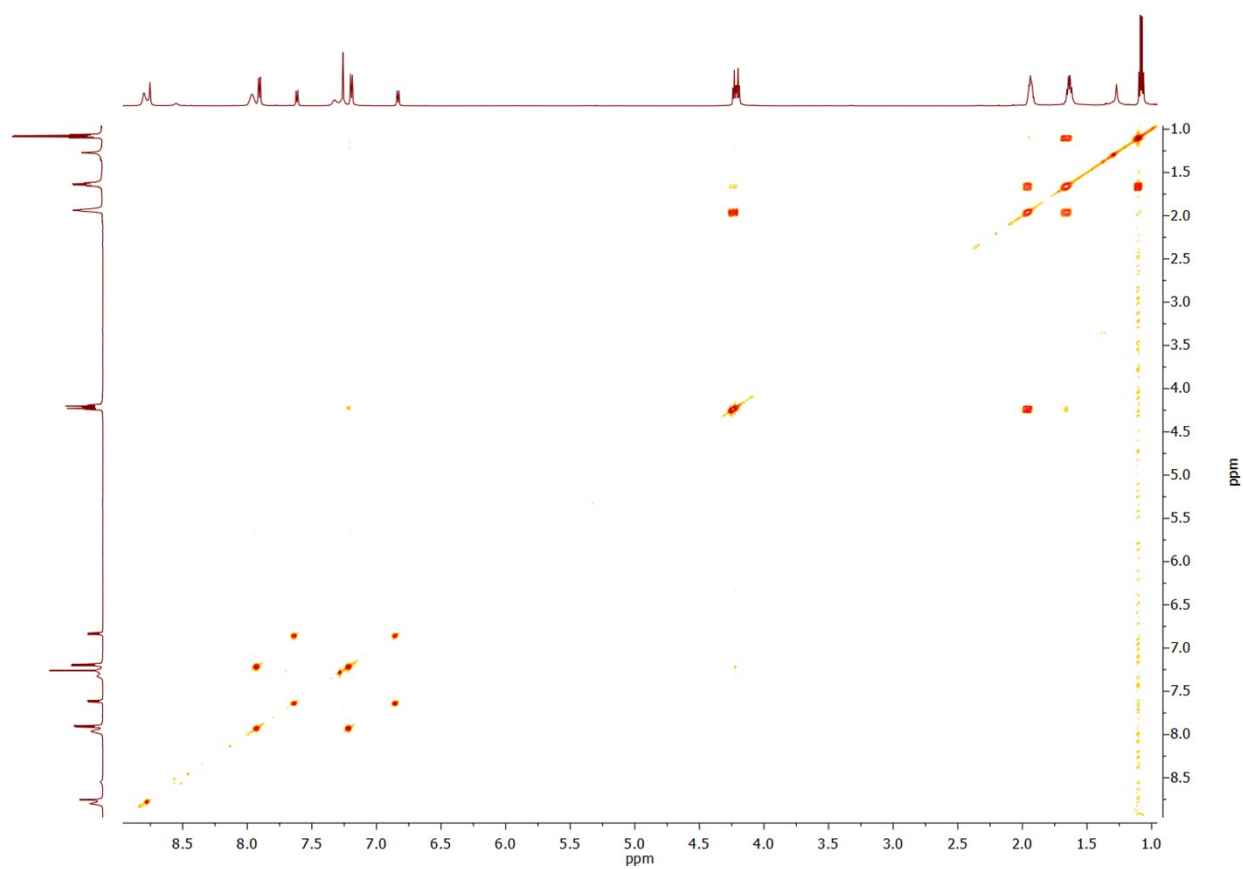

Figure S 22. COSY spectrum of **4c** ( $\text{CDCl}_3$ ).

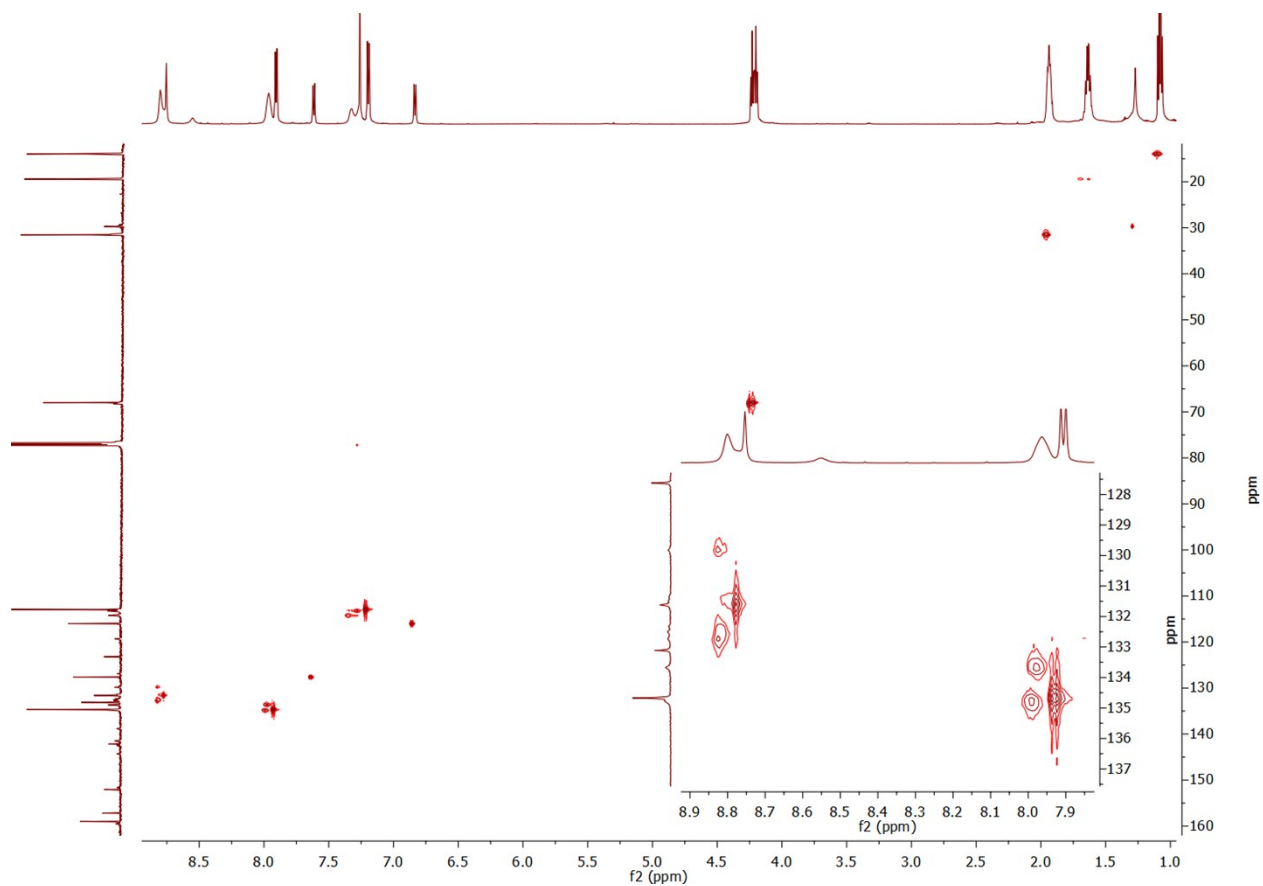

Figure S 23.  $^1\text{H}$ - $^{13}\text{C}$  HSQC spectrum of **4c** ( $\text{CDCl}_3$ ).

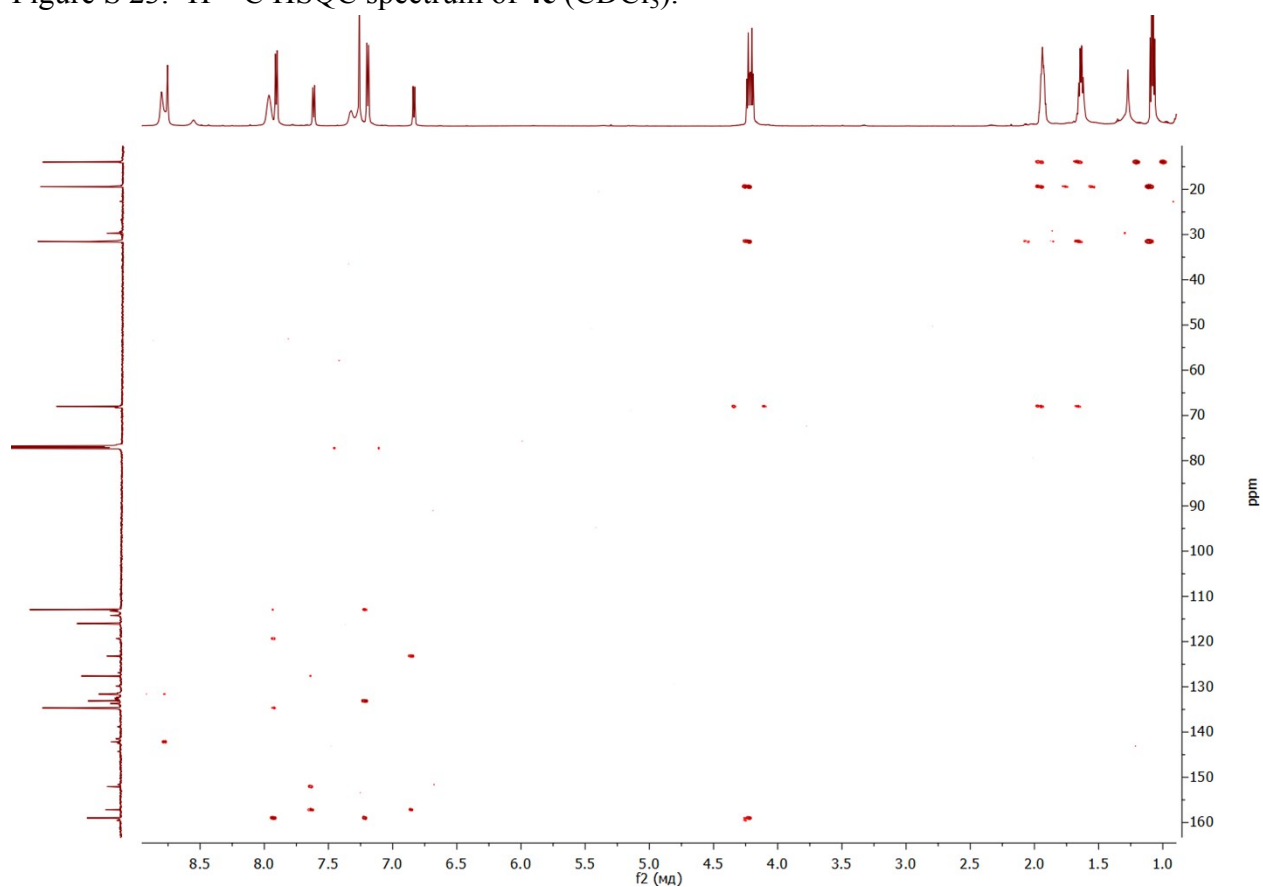

Figure S 24.  $^1\text{H}$ - $^{13}\text{C}$  HMBC spectrum of **4c** ( $\text{CDCl}_3$ ).

## Spectral data of 4e

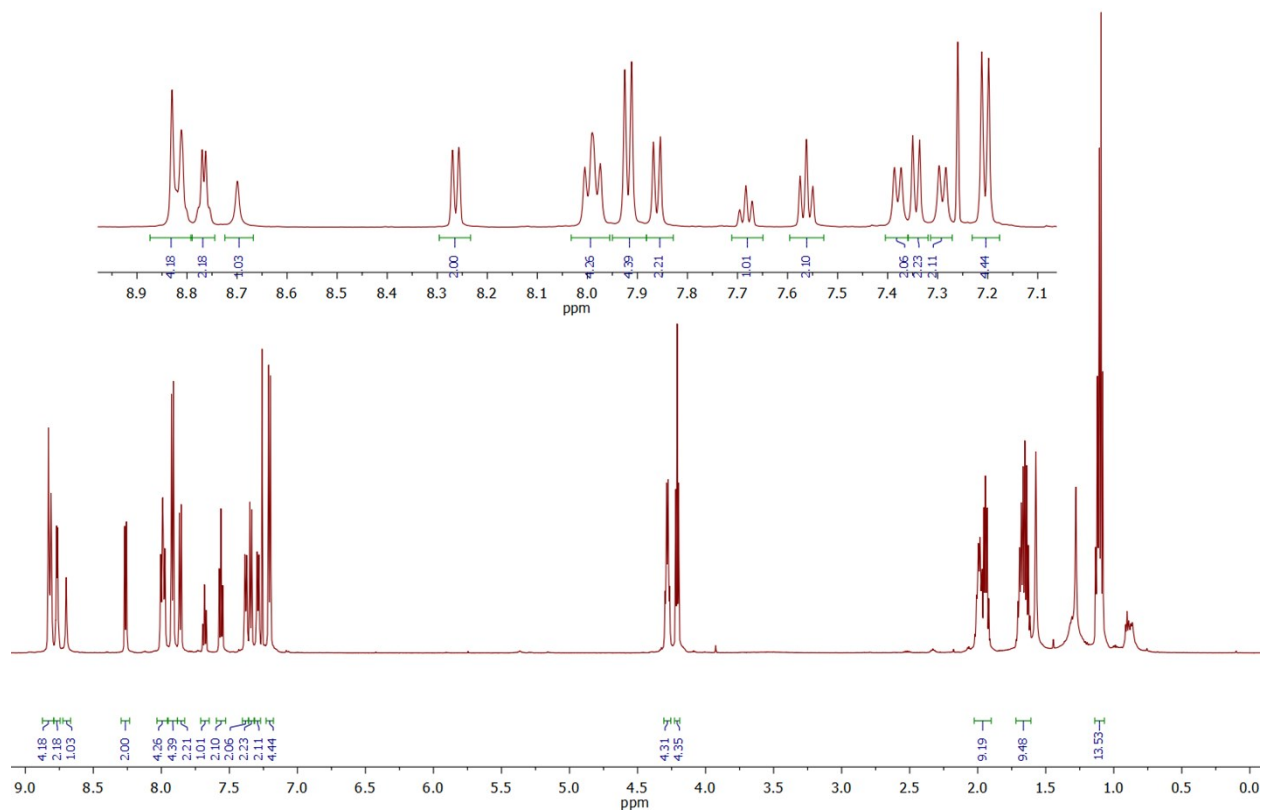

Figure S 25. <sup>1</sup>H-NMR spectrum of 4e (CDCl<sub>3</sub>).

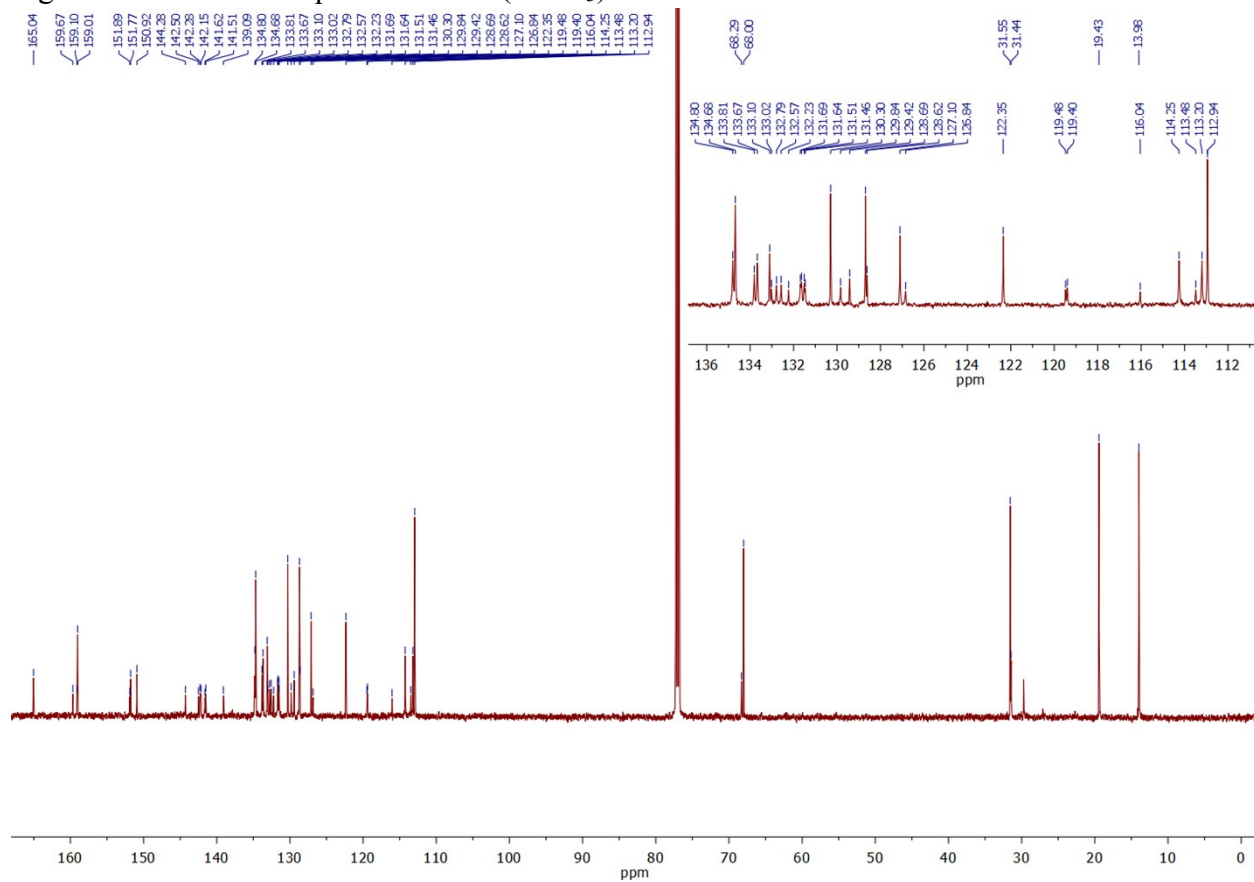

Figure S 26. <sup>13</sup>C-NMR spectrum of 4e (CDCl<sub>3</sub>).

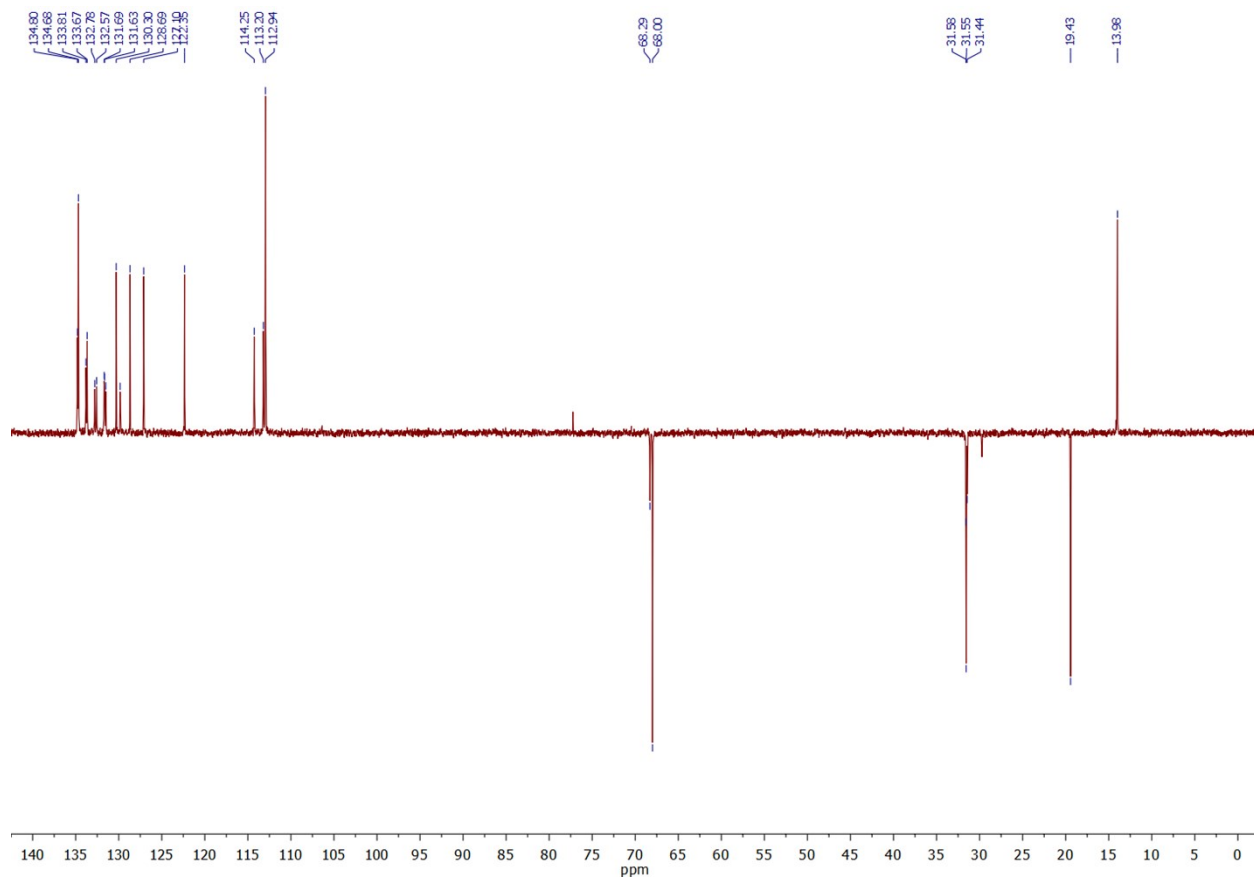

Figure S 27.  $^{13}\text{C}$  DEPT spectrum of **4e** ( $\text{CDCl}_3$ ).

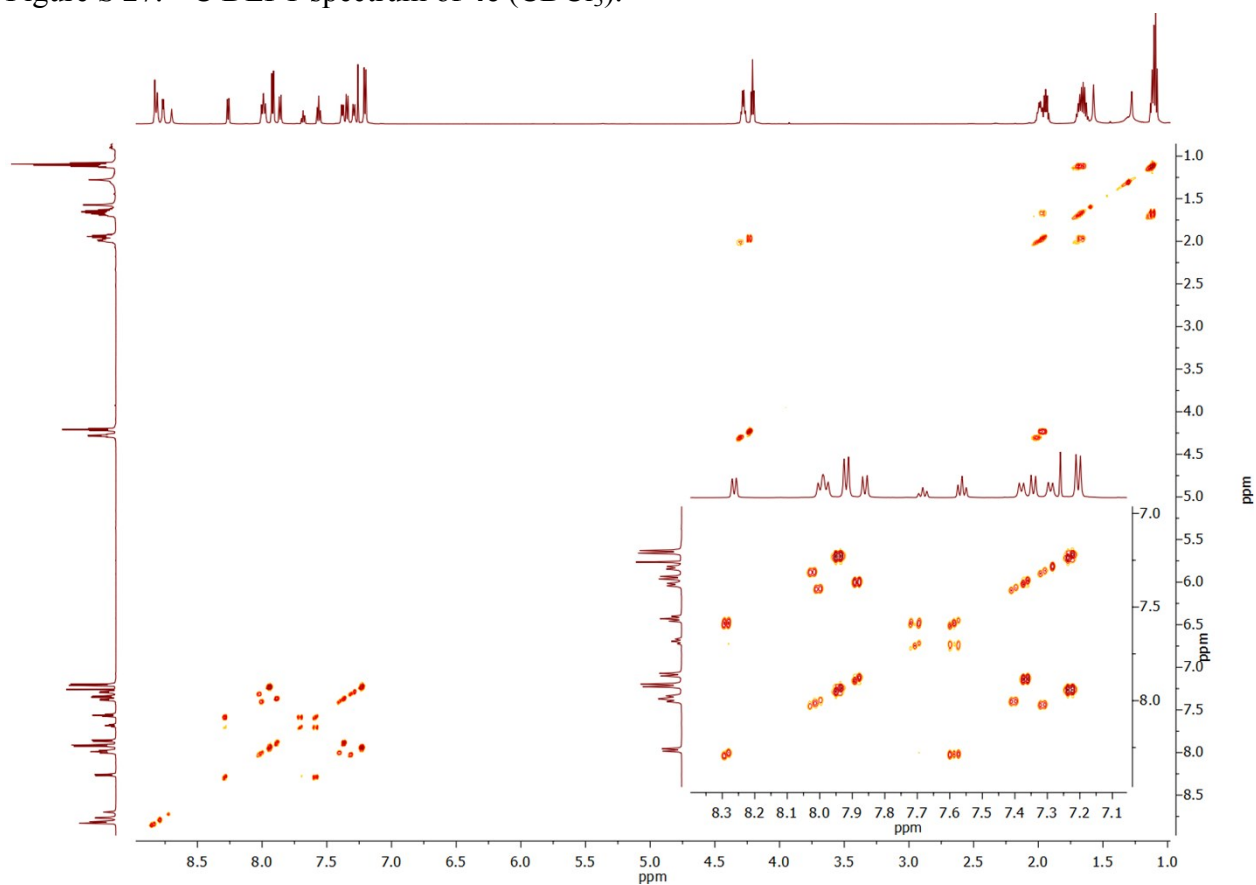

Figure S 28. COSY spectrum of **4e** ( $\text{CDCl}_3$ ).

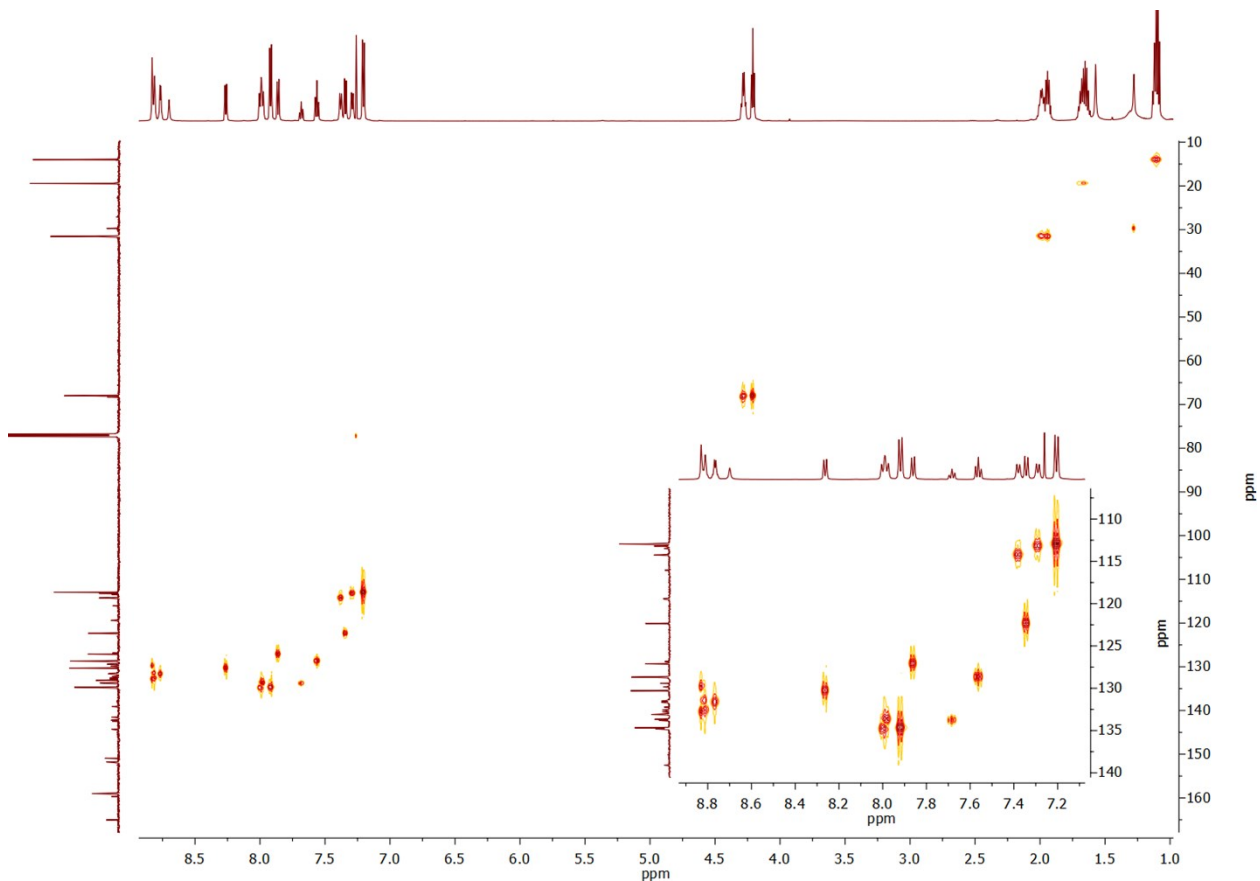

Figure S 29.  $^1\text{H}$ - $^{13}\text{C}$  HSQC spectrum of **4e** ( $\text{CDCl}_3$ ).

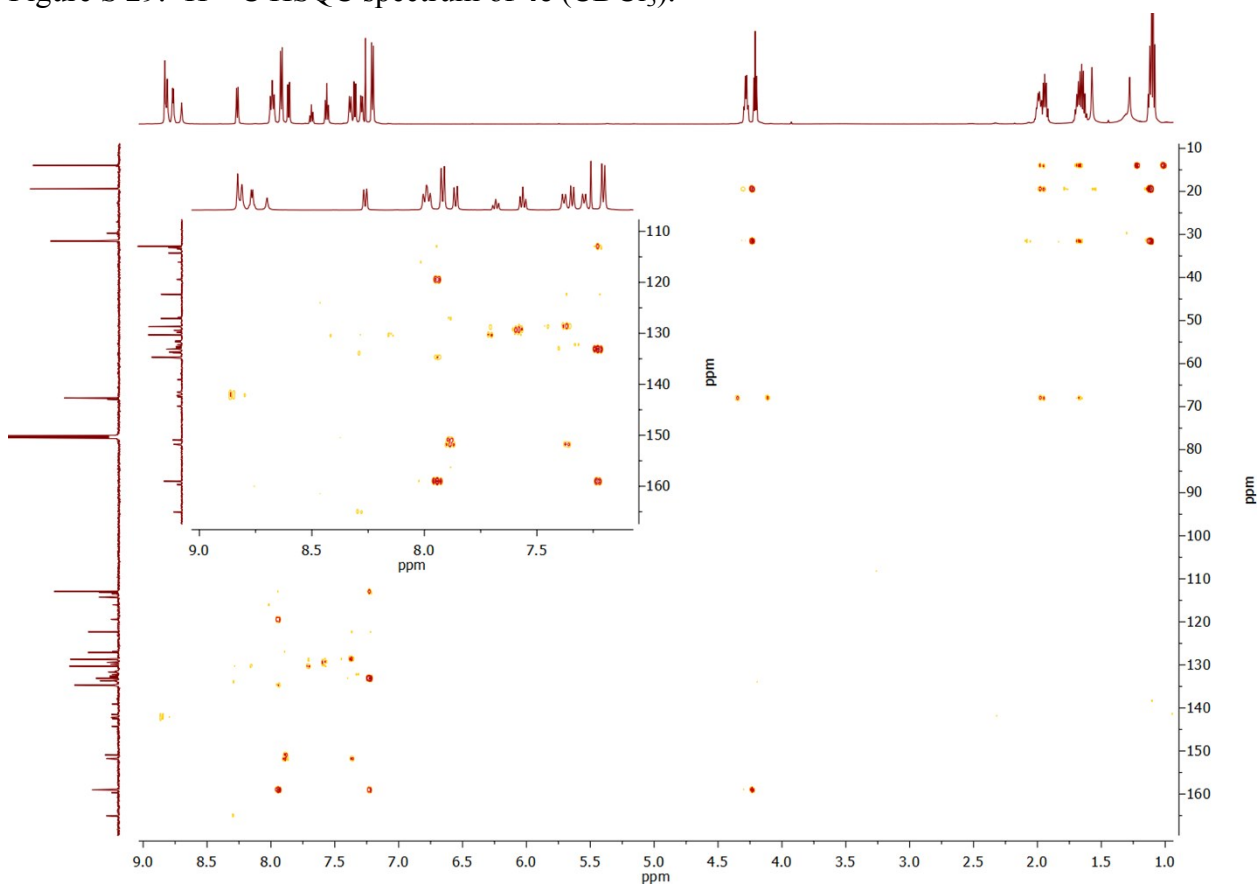

Figure S 30.  $^1\text{H}$ - $^{13}\text{C}$  HMBC spectrum of **4e** ( $\text{CDCl}_3$ ).



## Spectral data of 4f

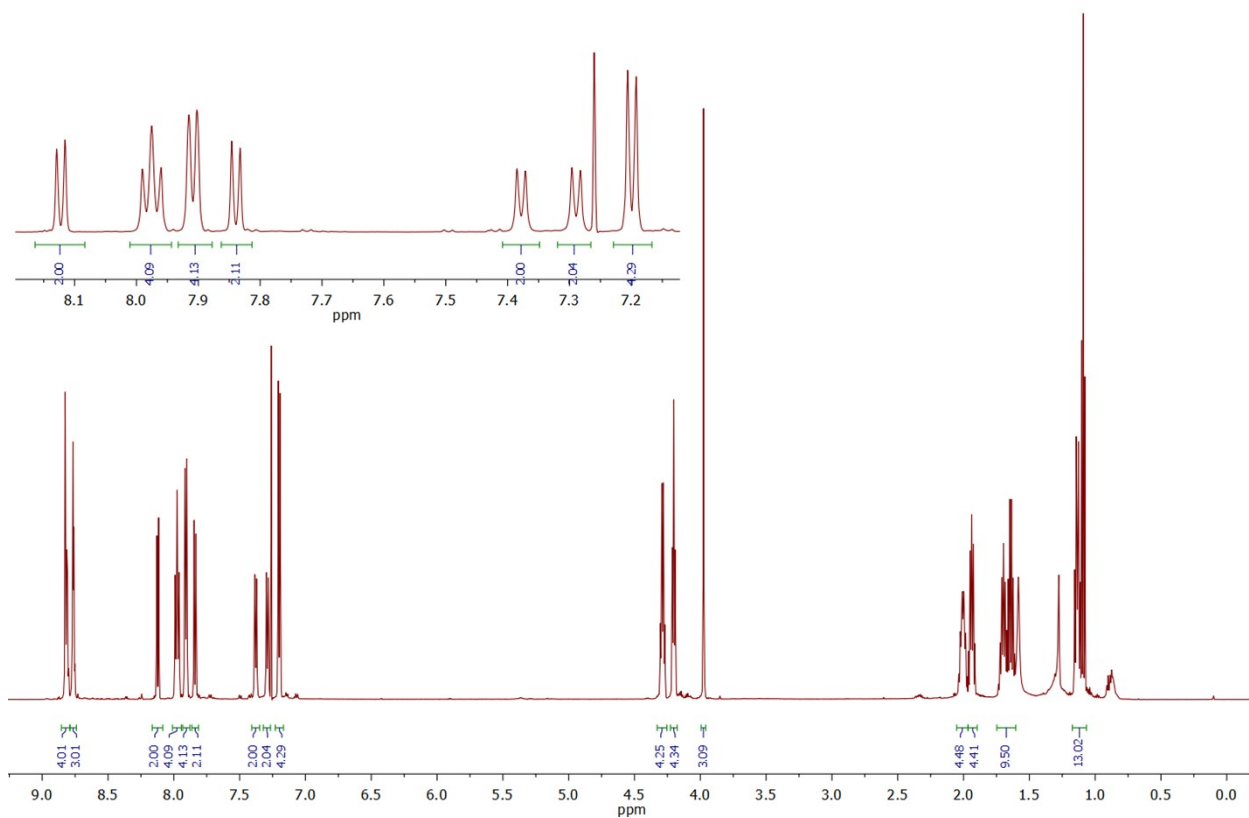

Figure S 31. <sup>1</sup>H-NMR spectrum of 4f (CDCl<sub>3</sub>).

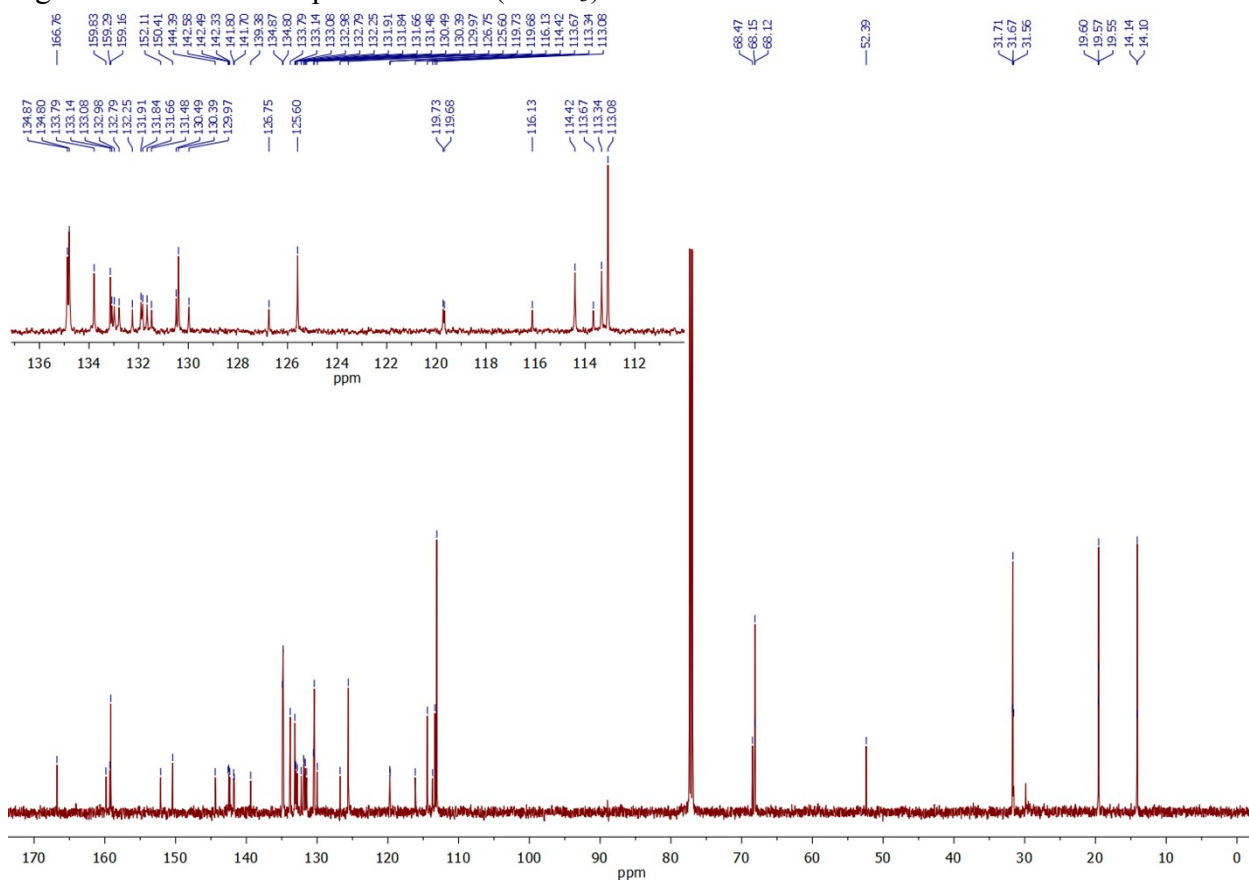

Figure S 32. <sup>13</sup>C-NMR spectrum of 4f (CDCl<sub>3</sub>).

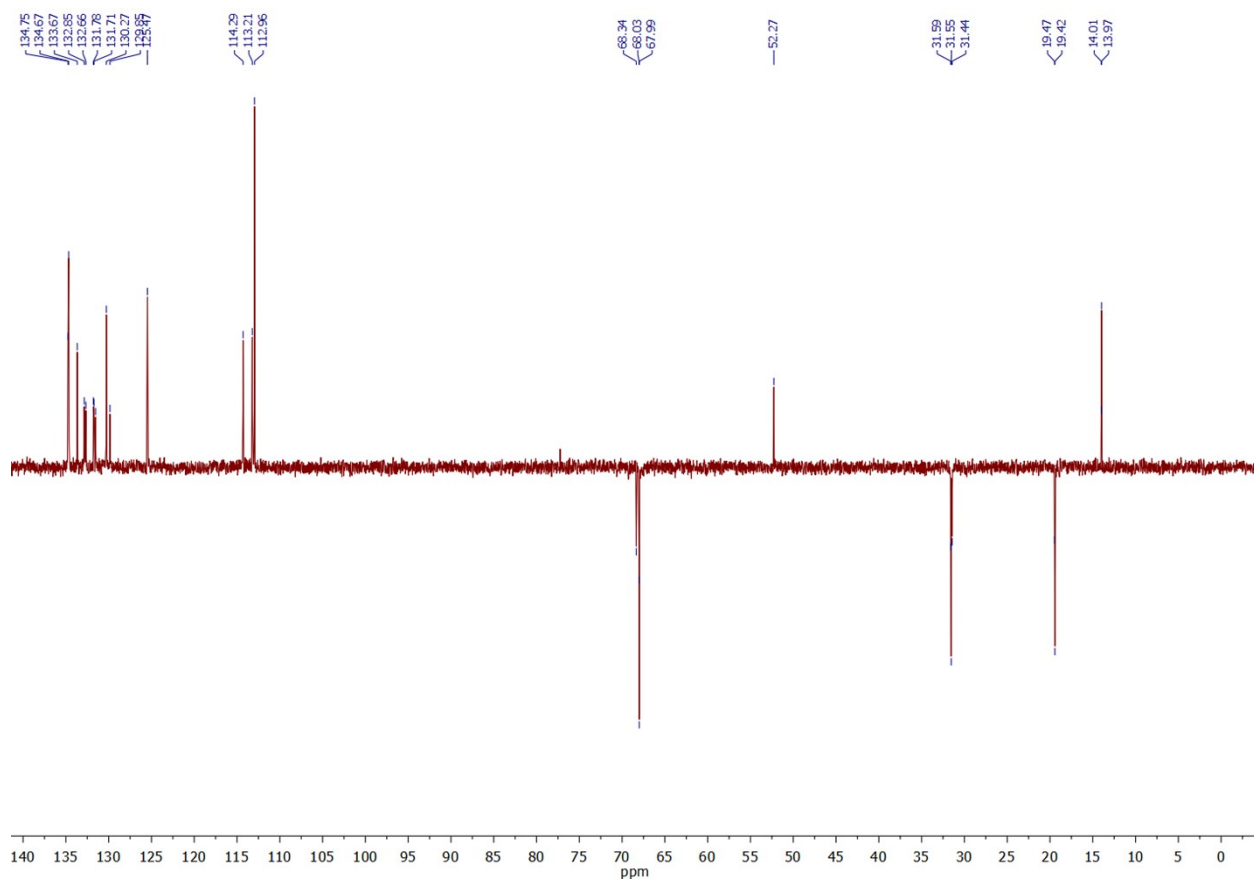

Figure S 33.  $^{13}\text{C}$  DEPT-135 spectrum of **4f** ( $\text{CDCl}_3$ ).

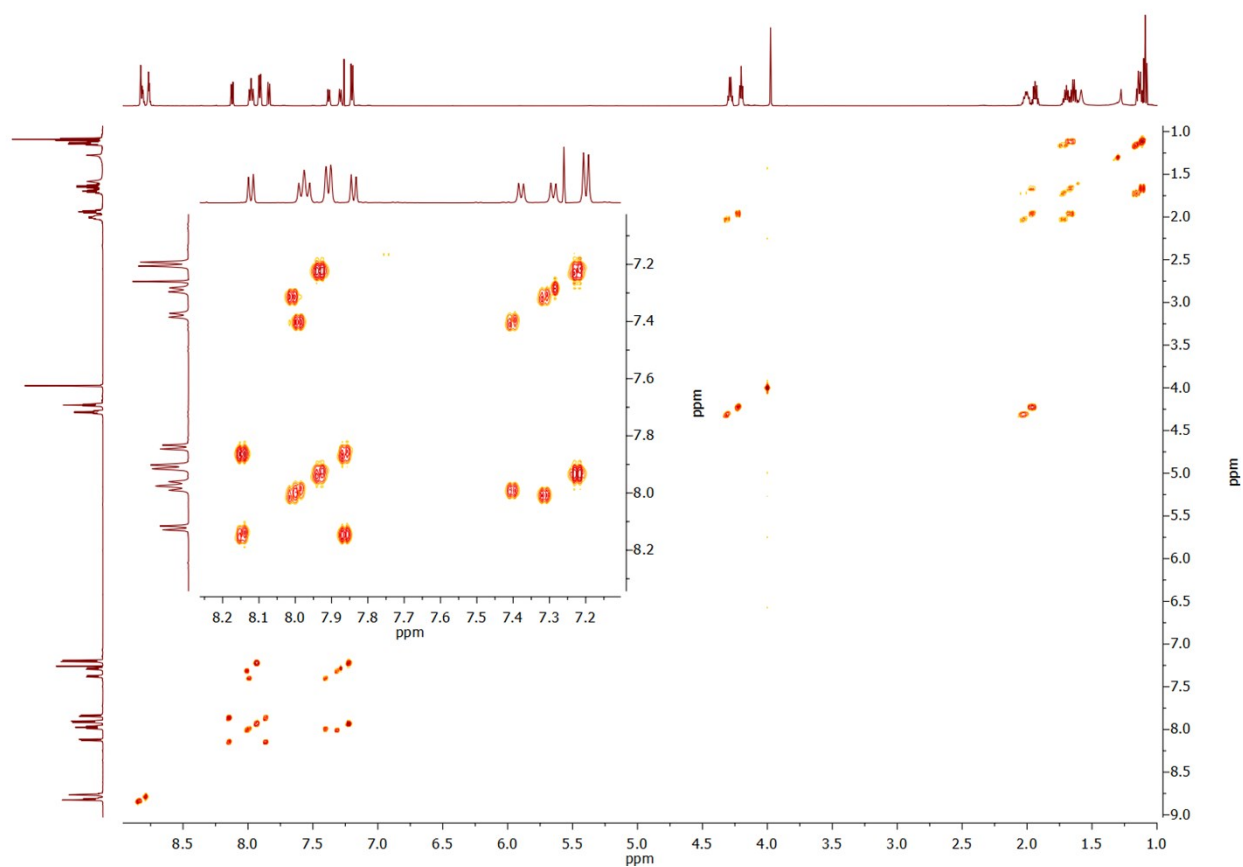

Figure S 34. COSY spectrum of **4f** ( $\text{CDCl}_3$ ).

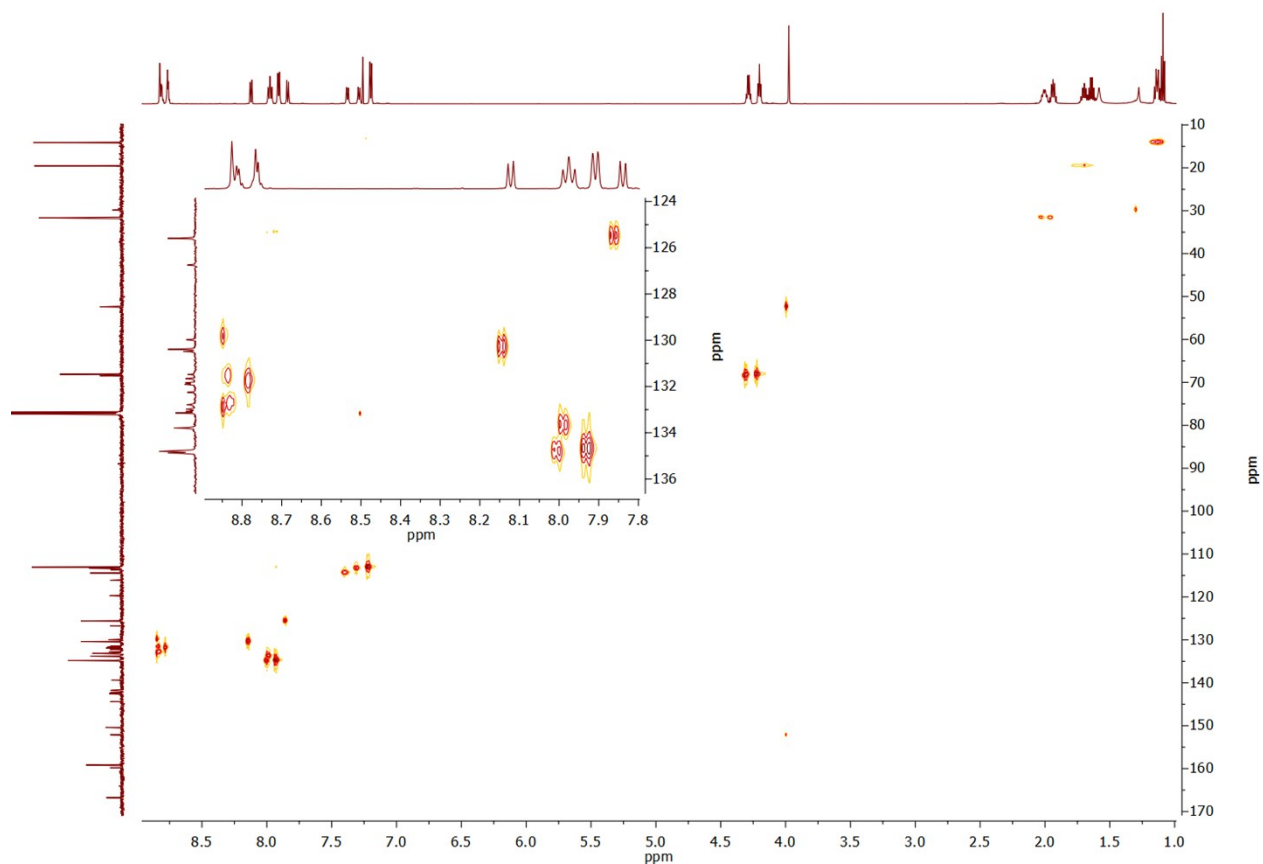

Figure S 35.  $^1\text{H}$ - $^{13}\text{C}$  HSQC spectrum of **4f** ( $\text{CDCl}_3$ ).

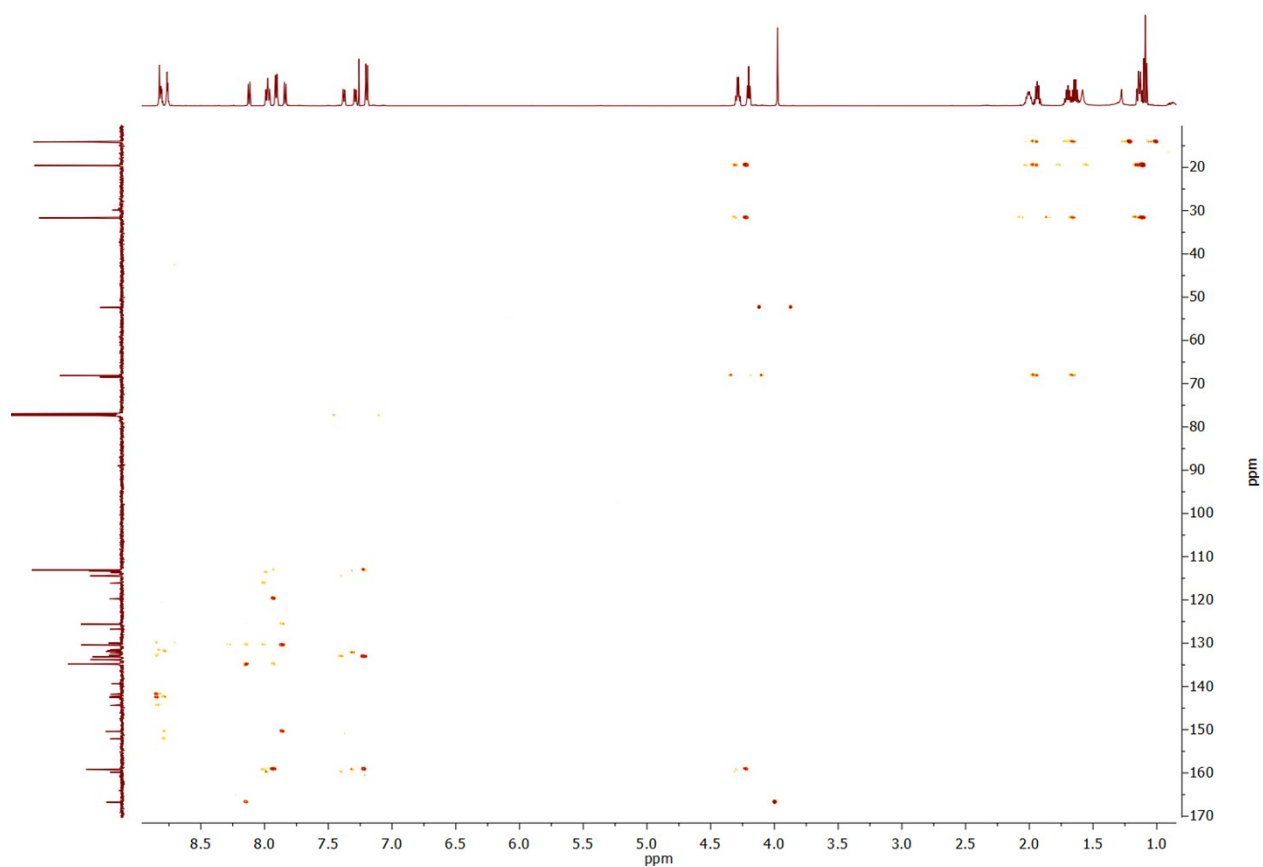

Figure S 36.  $^1\text{H}$ - $^{13}\text{C}$  HMBC spectrum of **4f** ( $\text{CDCl}_3$ ).

## Spectral data of 4g

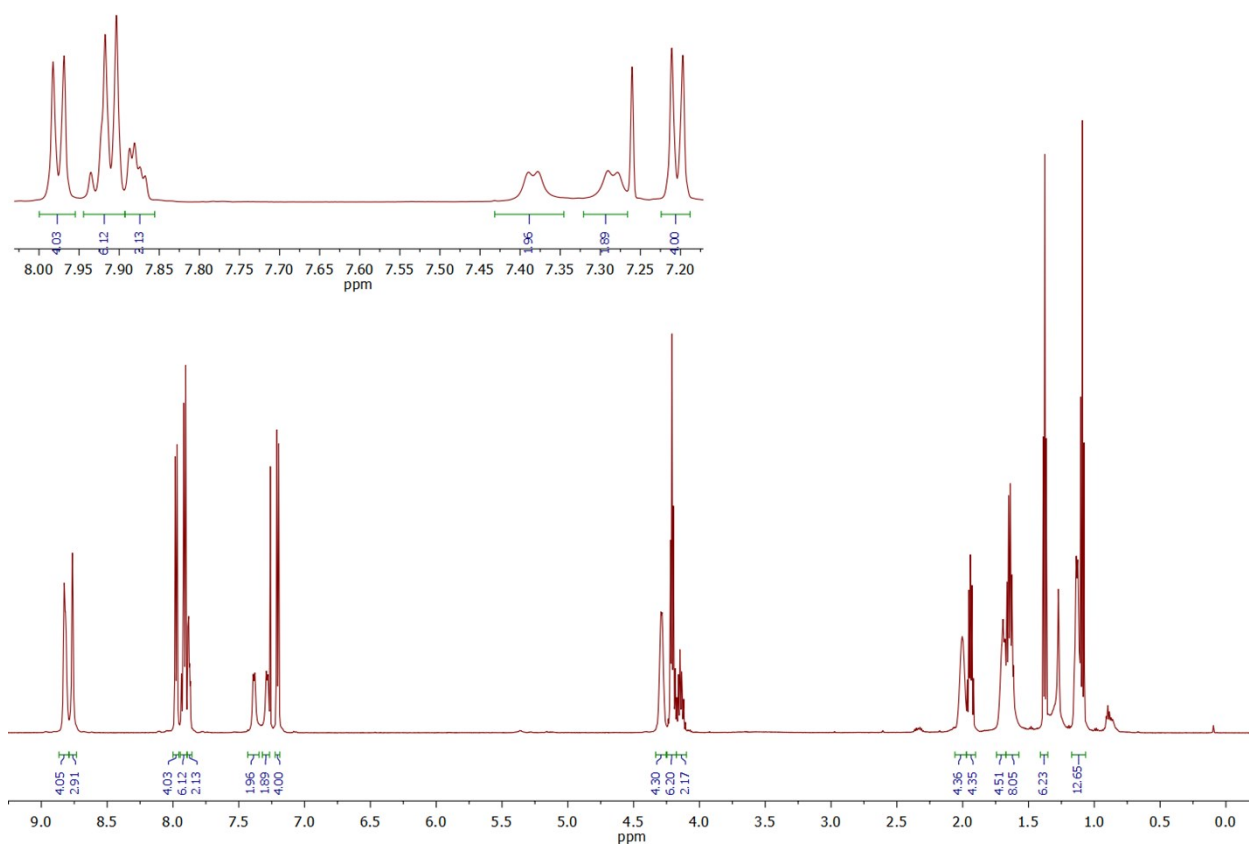

Figure S 37. <sup>1</sup>H-NMR spectrum of **4g** (CDCl<sub>3</sub>).

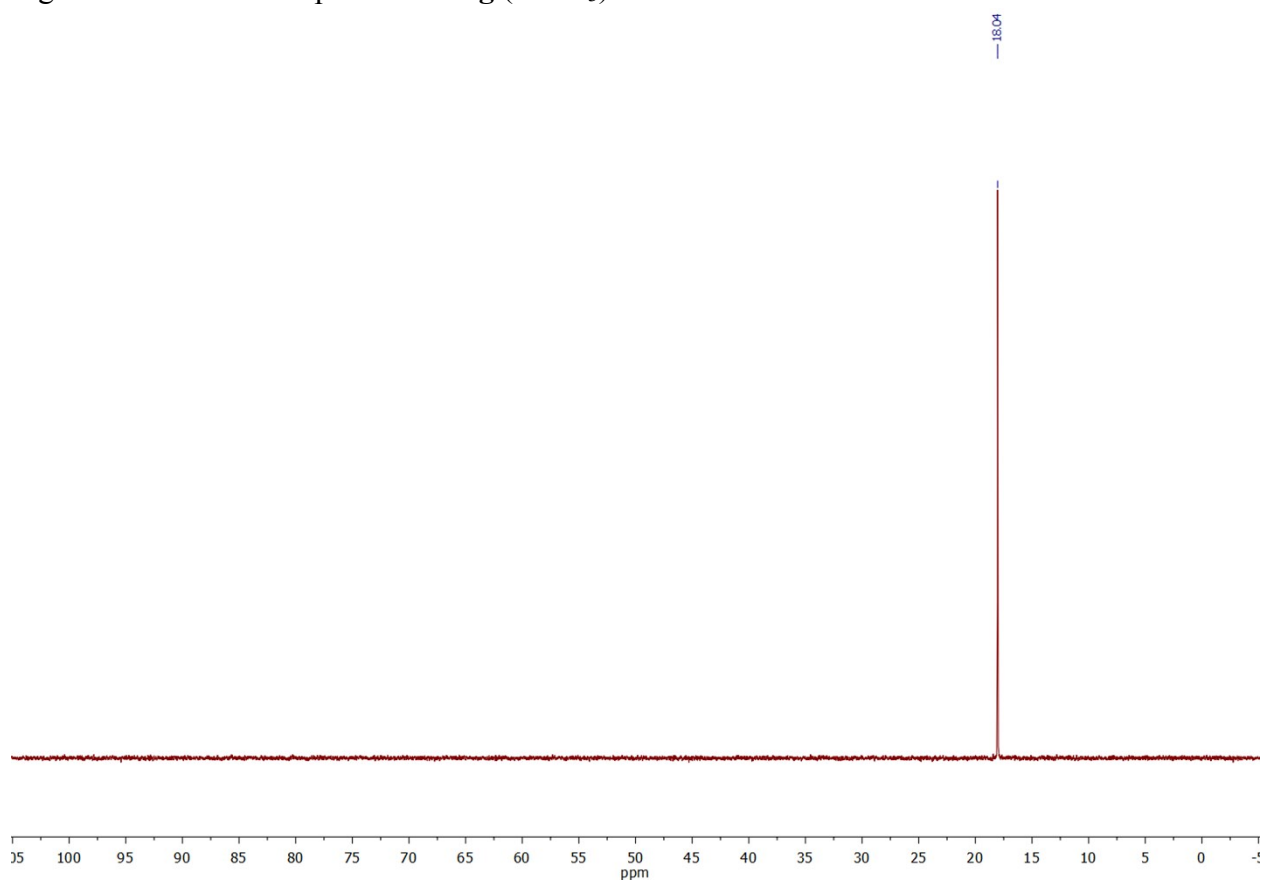

Figure S 38. <sup>31</sup>P-NMR spectrum of **4g** (CDCl<sub>3</sub>).

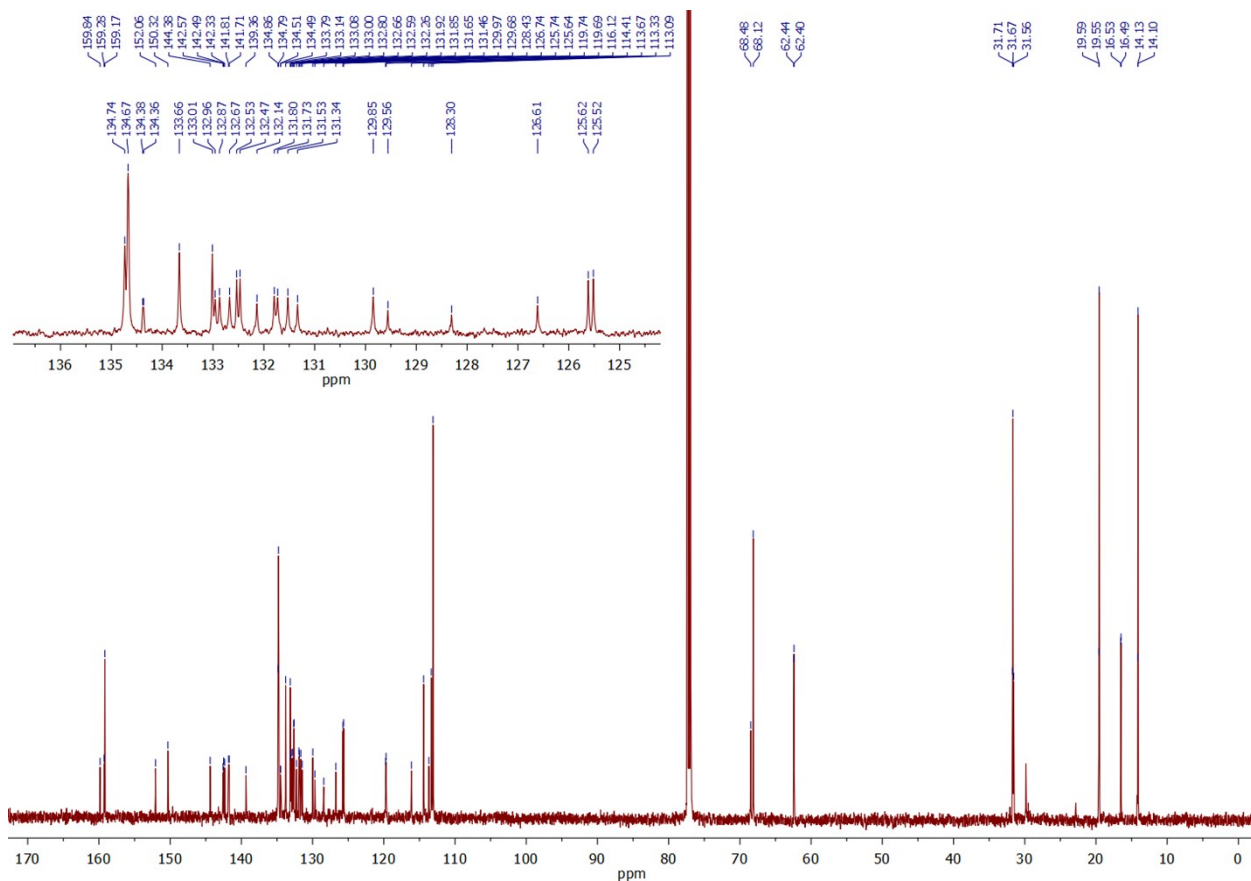

Figure S 39.  $^{13}\text{C}$ -NMR spectrum of **4g** ( $\text{CDCl}_3$ ).

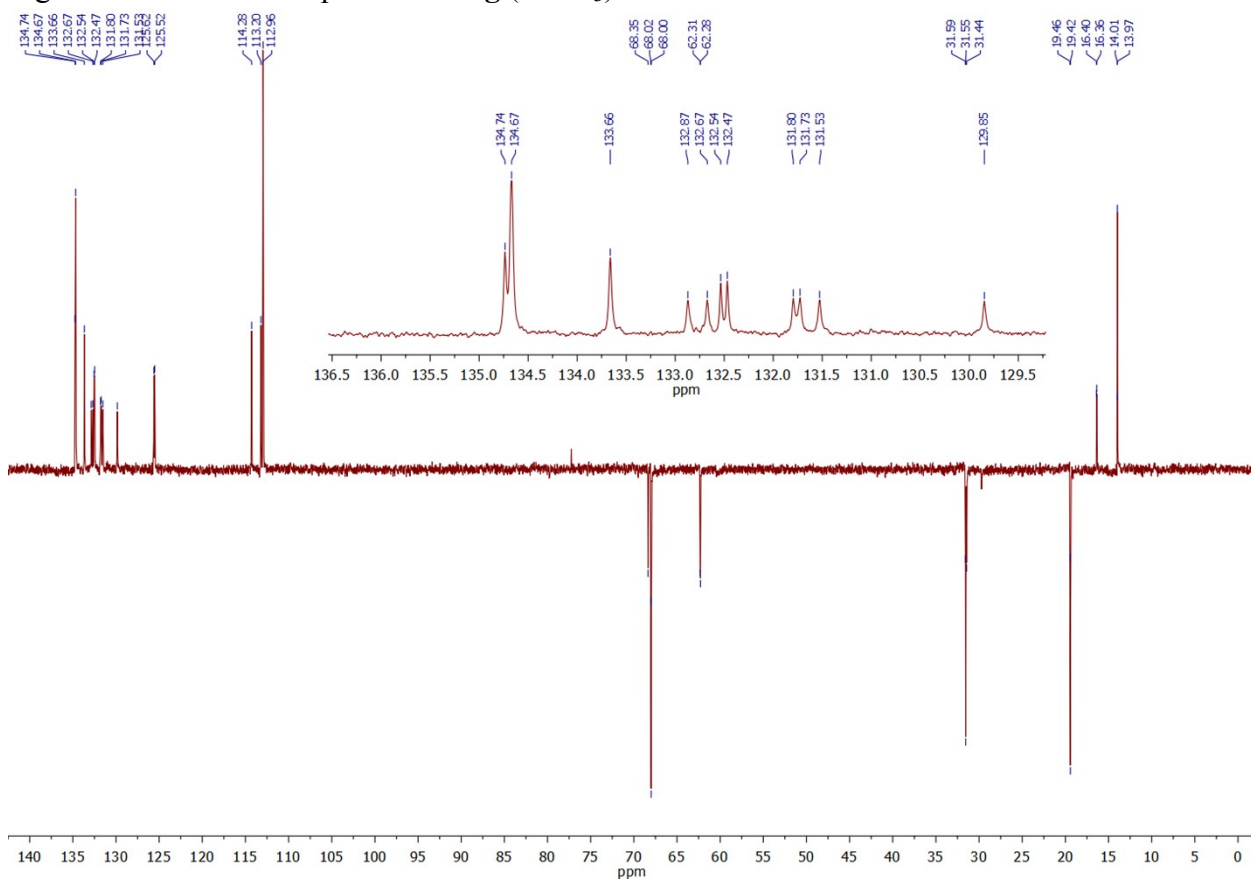

Figure S 40.  $^{13}\text{C}$  DEPT spectrum of **4g** ( $\text{CDCl}_3$ ).

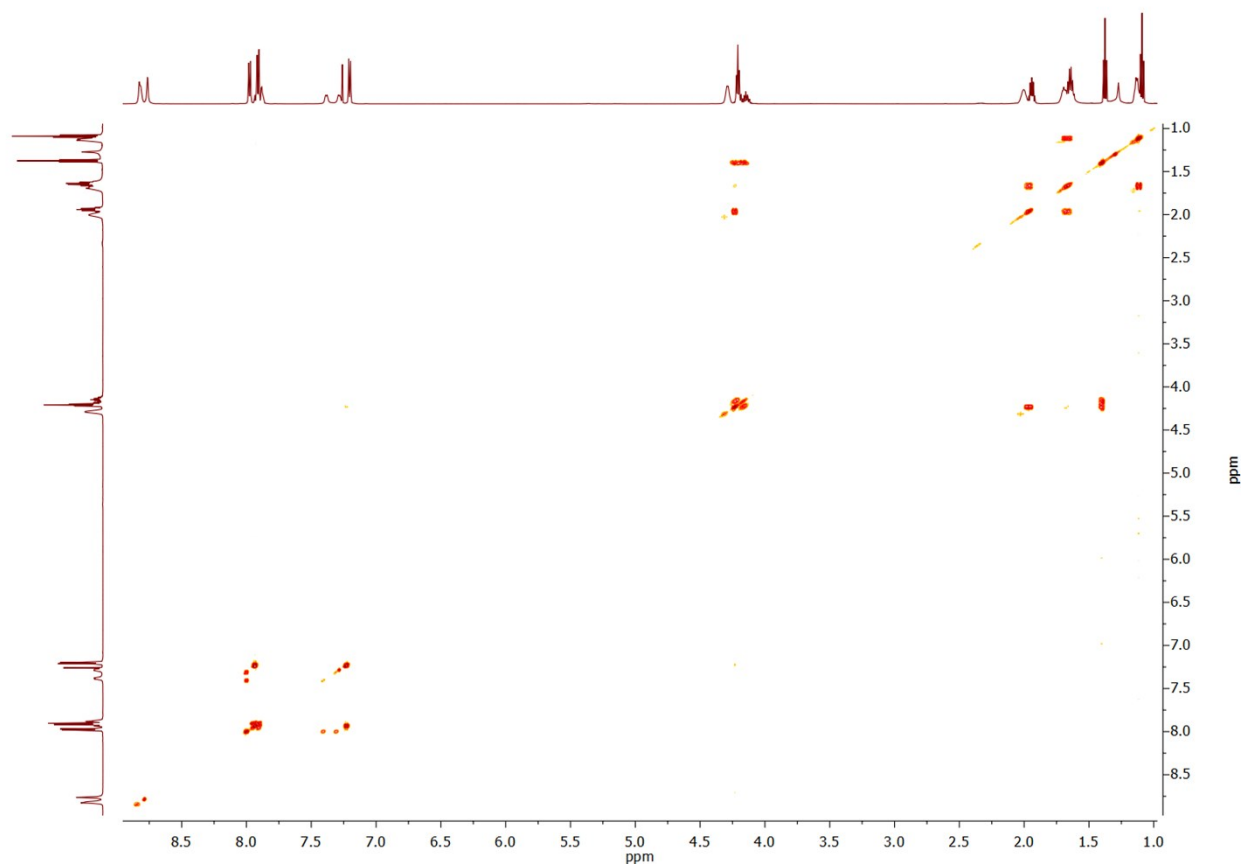

Figure S 41. COSY spectrum of **4g** (CDCl<sub>3</sub>).

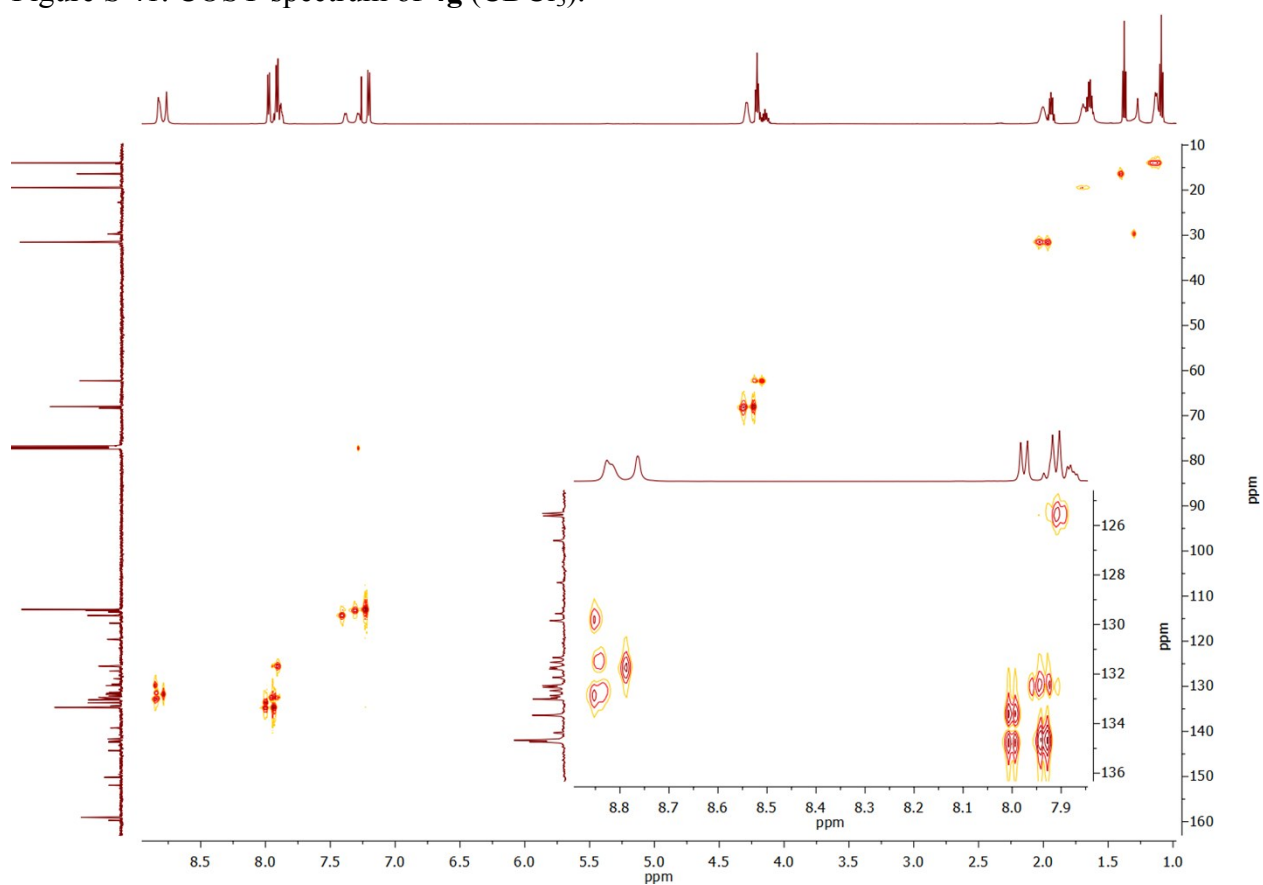

Figure S 42. <sup>1</sup>H-<sup>13</sup>C HSQC spectrum of **4g** (CDCl<sub>3</sub>).

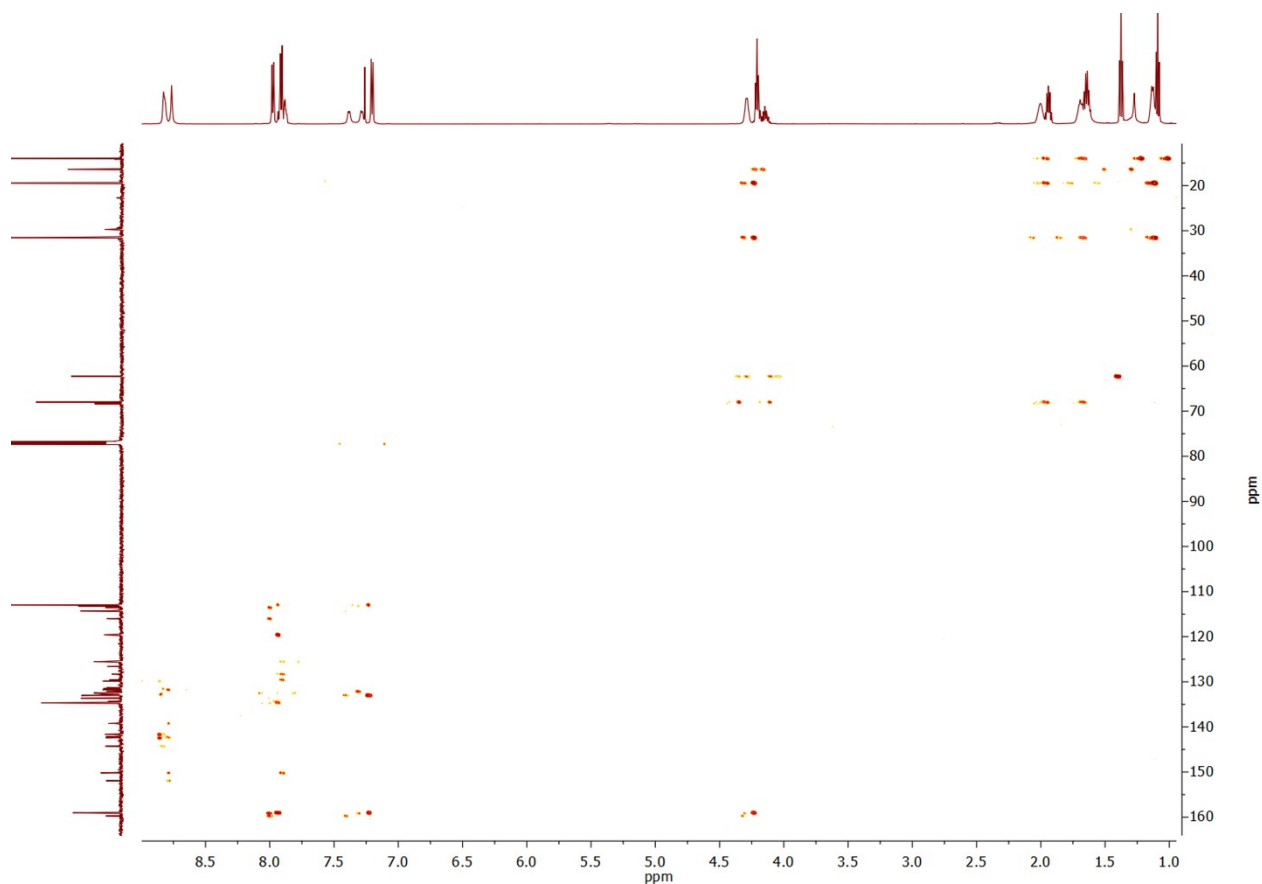

Figure S 43.  $^1\text{H}$ - $^{13}\text{C}$  HMBC spectrum of **4g** ( $\text{CDCl}_3$ ).

### Spectral data of **4h**

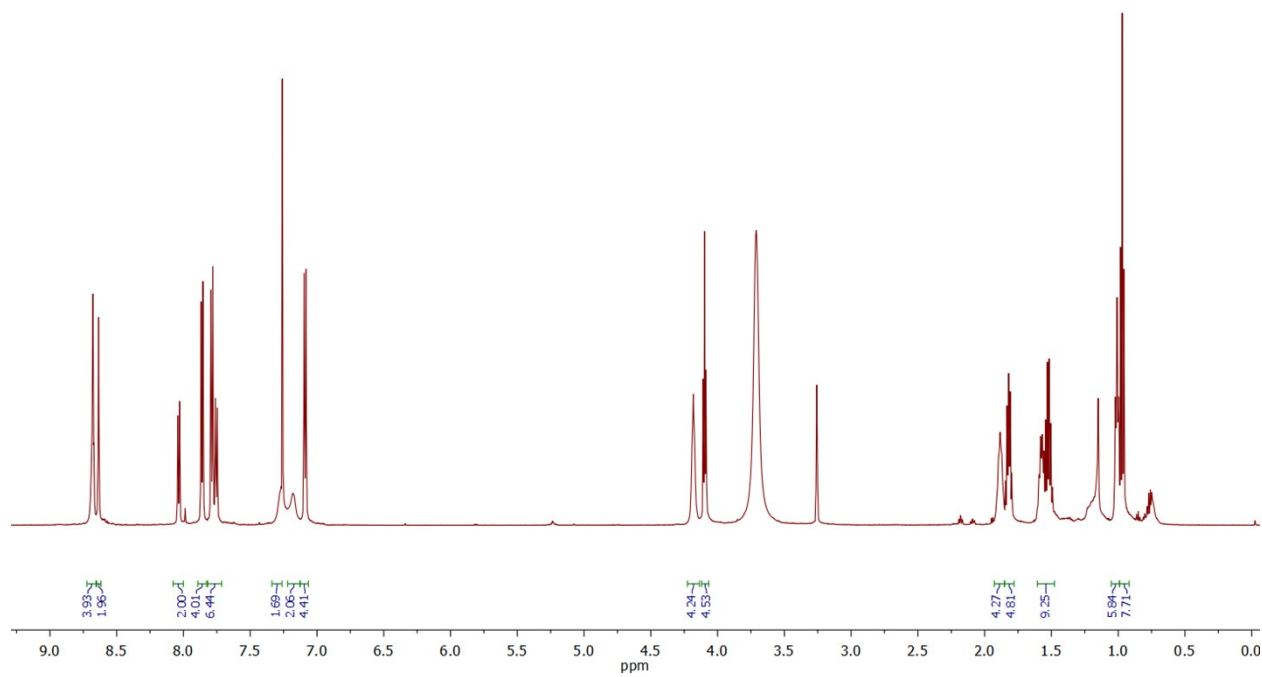

Figure S 44.  $^1\text{H}$ -NMR spectrum of **4h** (20% MeOD in  $\text{CDCl}_3$ ).

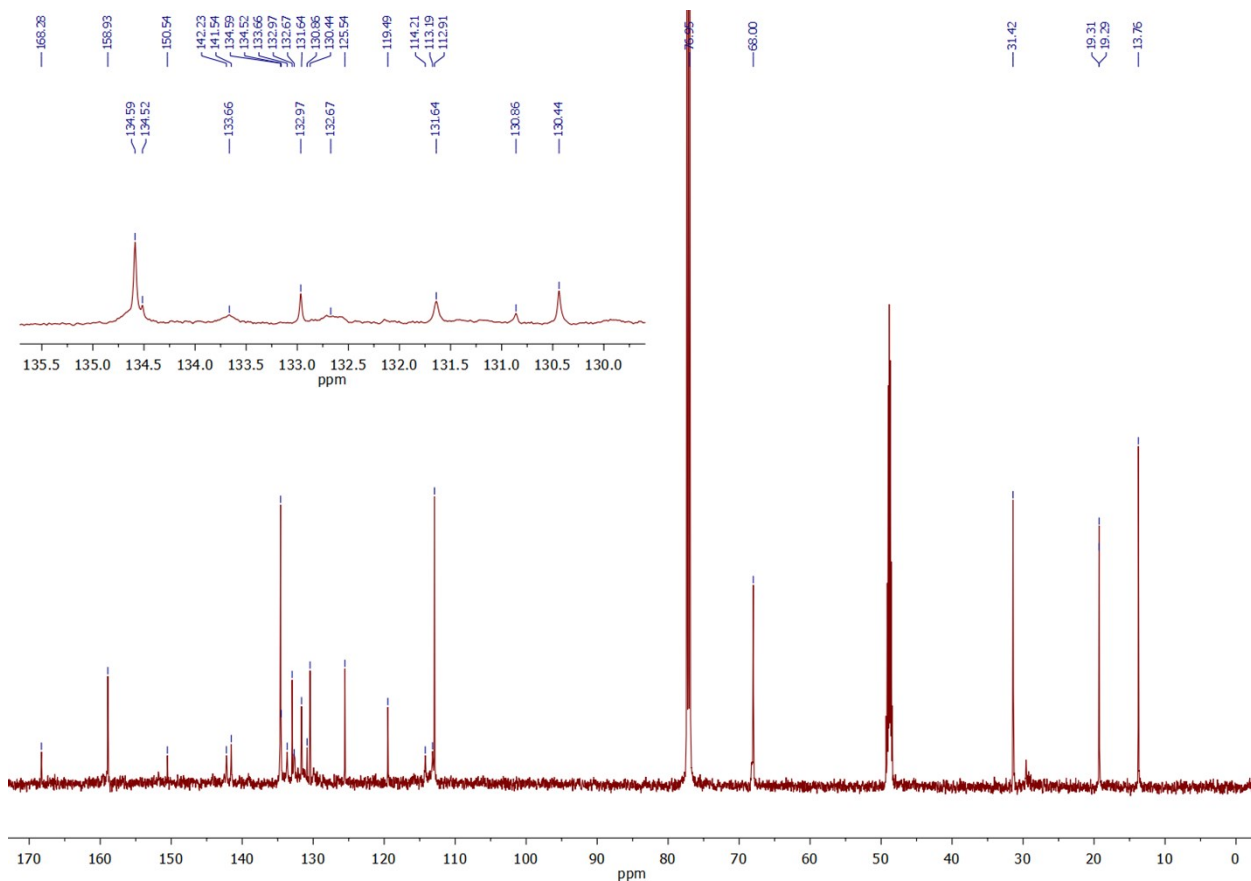

Figure S 45.  $^{13}\text{C}$ -NMR spectrum of **4h** (20% MeOD in  $\text{CDCl}_3$ ).

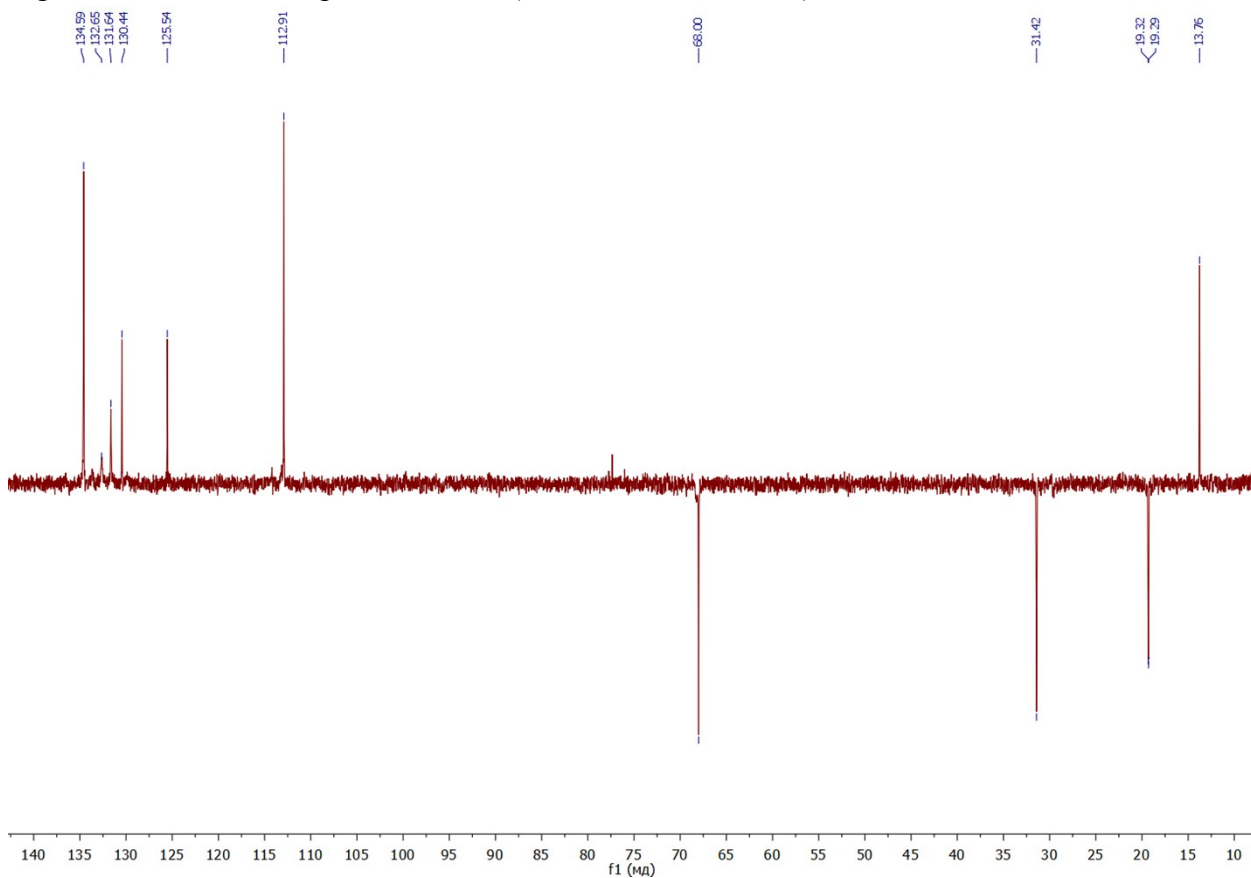

Figure S 46.  $^{13}\text{C}$  DEPT-135 spectrum of **4h** (20% MeOD in  $\text{CDCl}_3$ ).



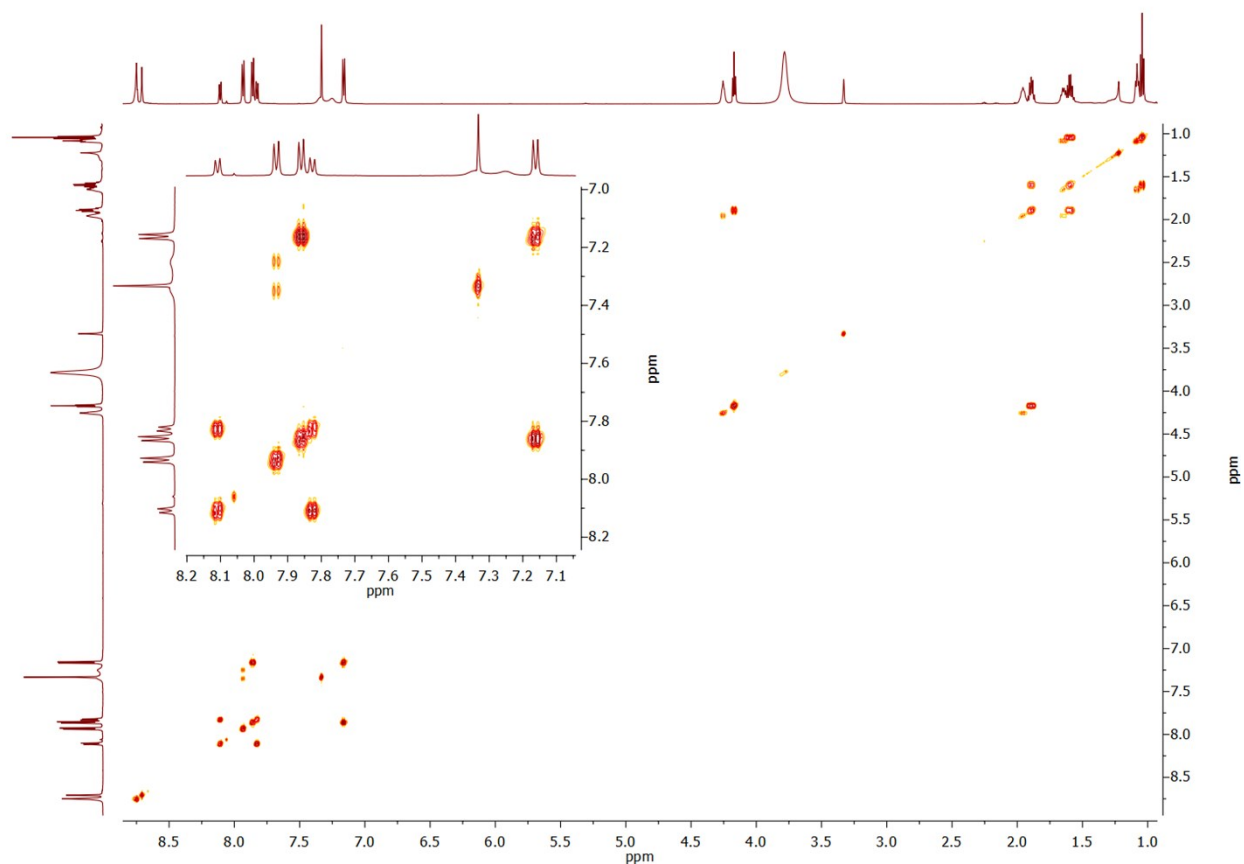

Figure S 47. COSY spectrum of **4h** (20% MeOD in CDCl<sub>3</sub>).

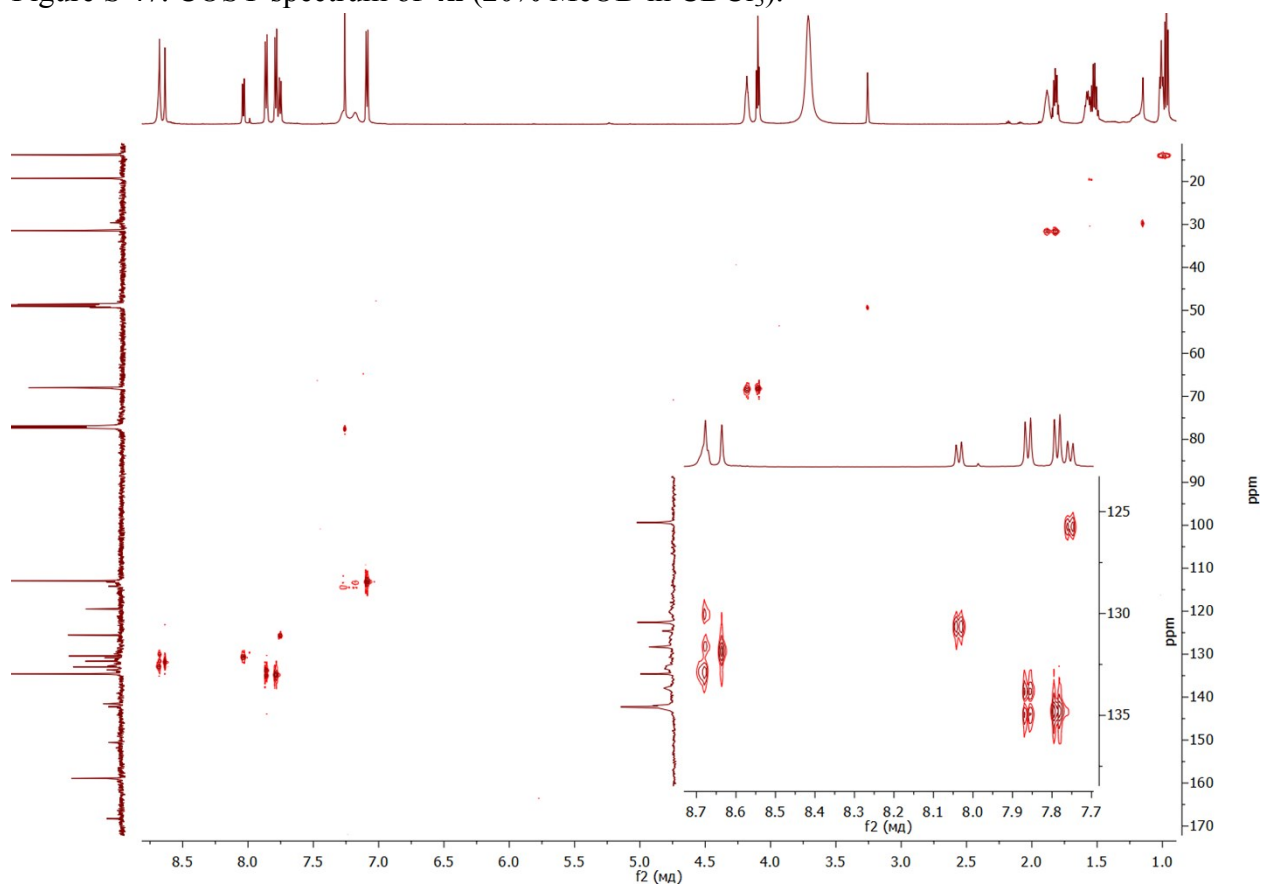

Figure S 48. <sup>1</sup>H-<sup>13</sup>C HSQC spectrum of **4h** (20% MeOD in CDCl<sub>3</sub>).

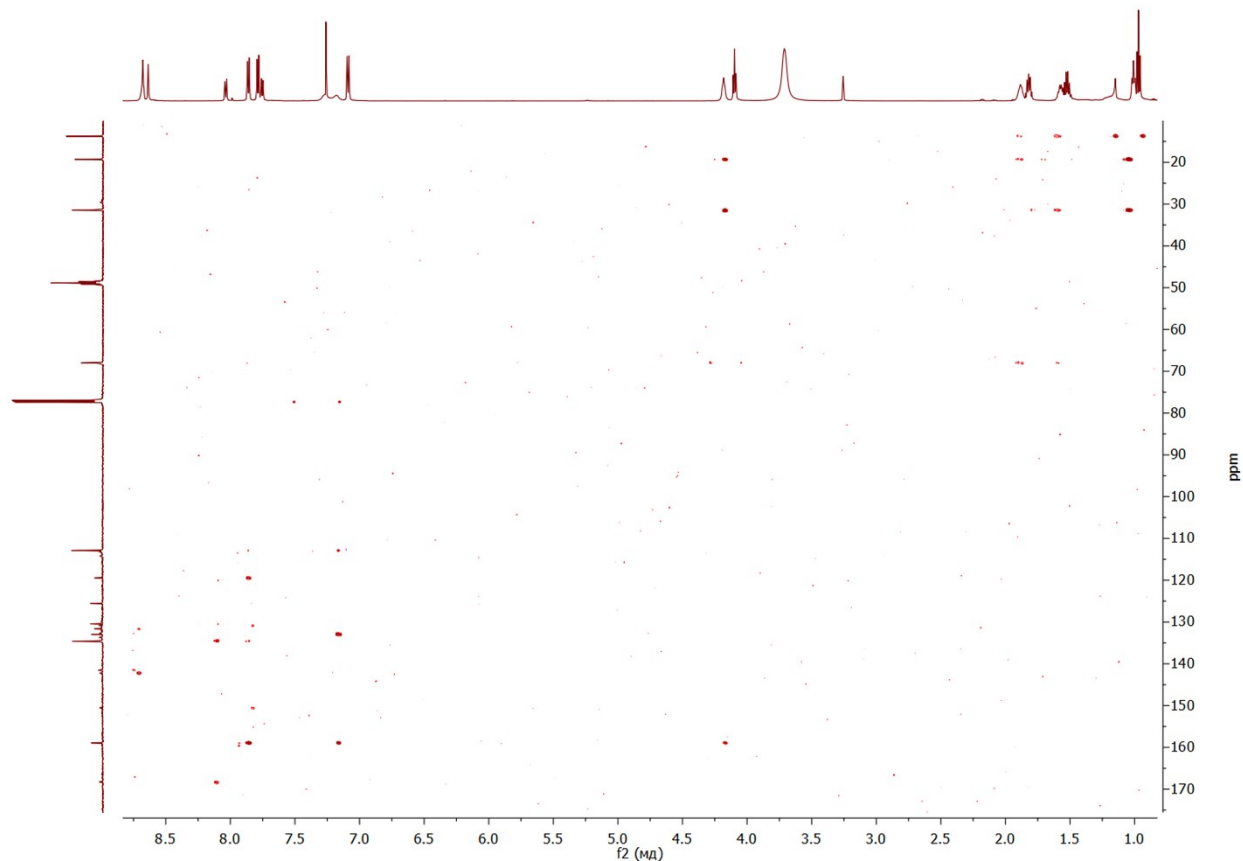

Figure S 49.  $^1\text{H}$ - $^{13}\text{C}$  HMBC spectrum of **4h** (20% MeOD in  $\text{CDCl}_3$ ).

### Spectral data of **5a**

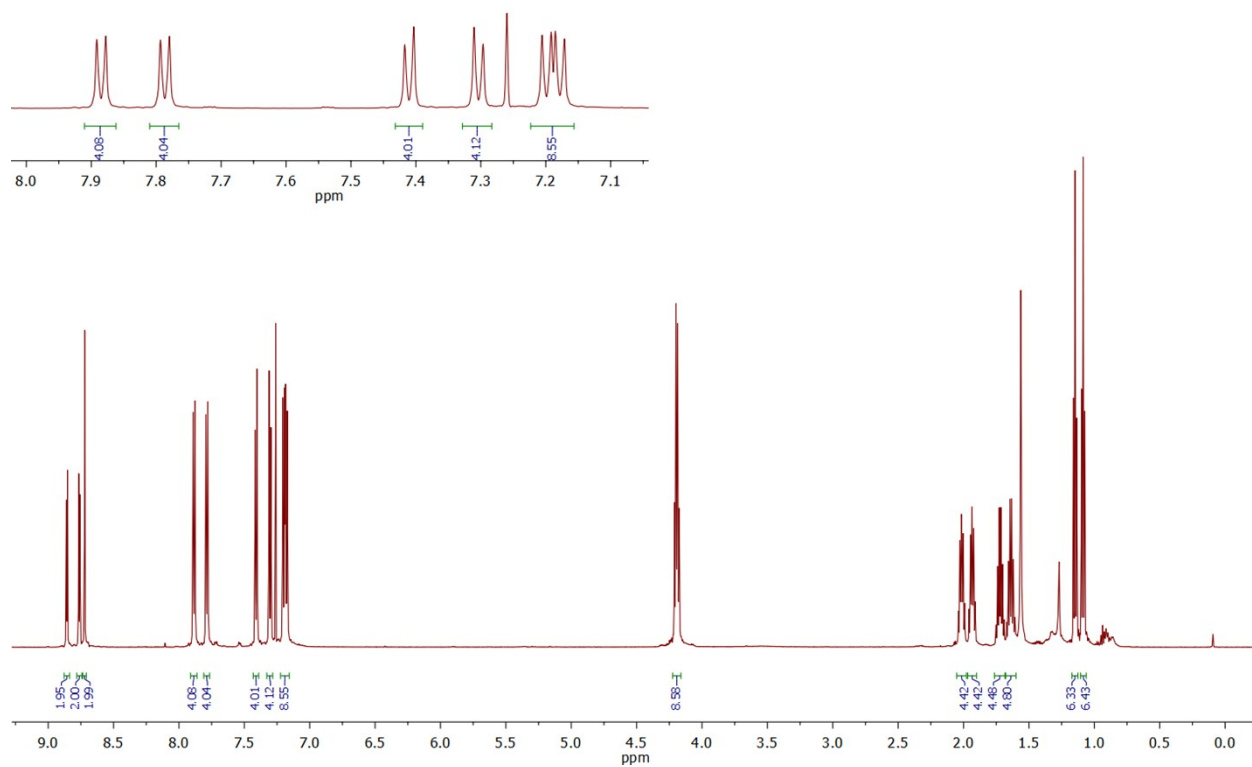

Figure S 50.  $^1\text{H}$ -NMR spectrum of **5a** ( $\text{CDCl}_3$ ).

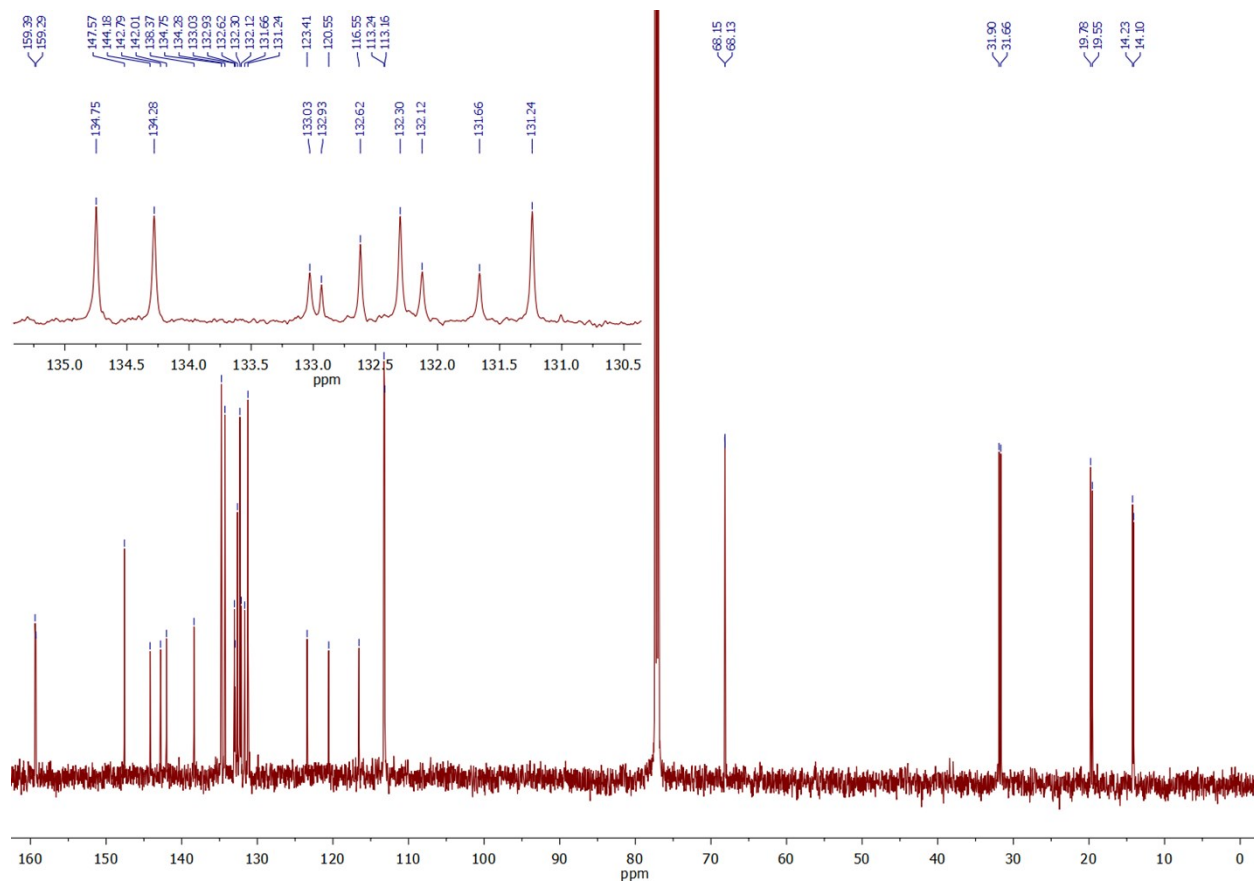

Figure S 51.  $^{13}\text{C}$ -NMR spectrum of **5a** ( $\text{CDCl}_3$ ).

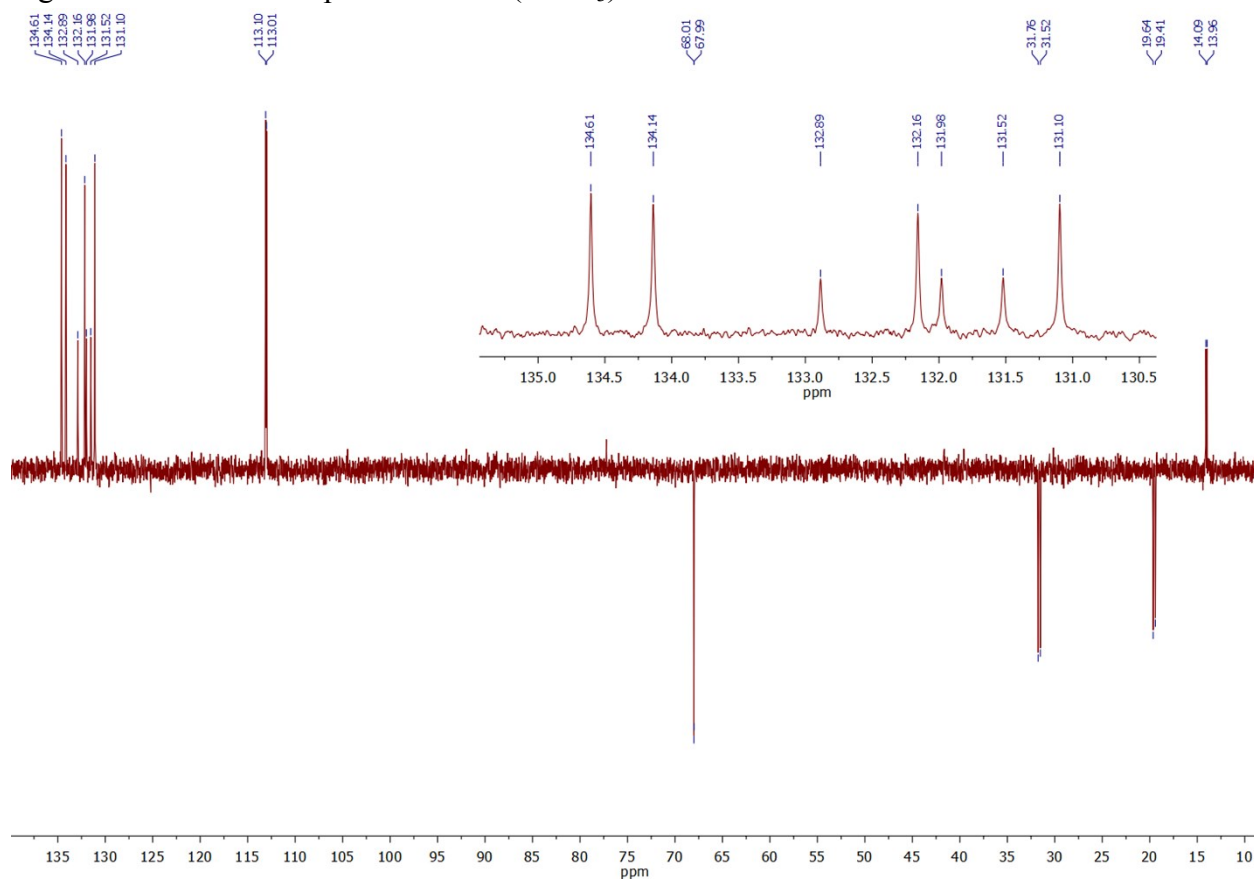

Figure S 52.  $^{13}\text{C}$  DEPT-135 spectrum of **5a** ( $\text{CDCl}_3$ ).

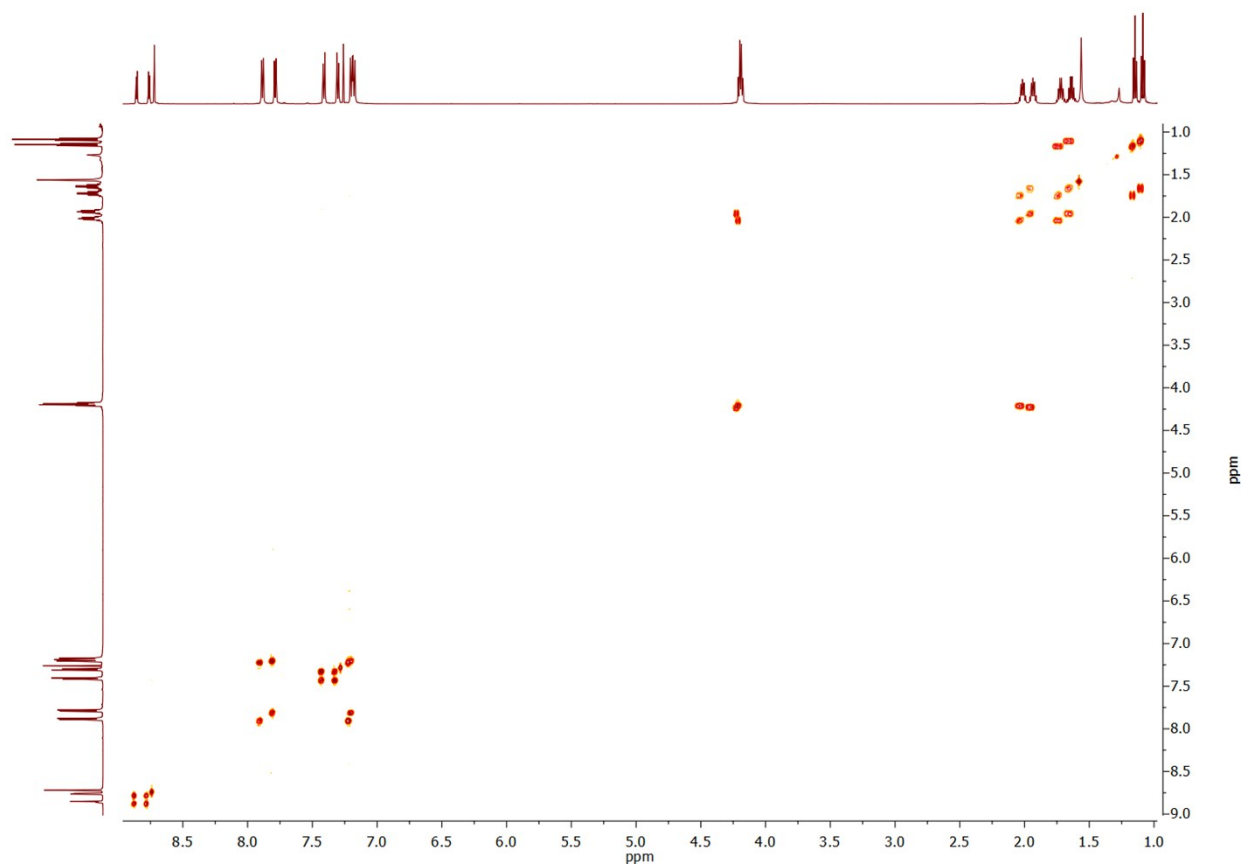

Figure S 53. COSY spectrum of **5a** (CDCl<sub>3</sub>).

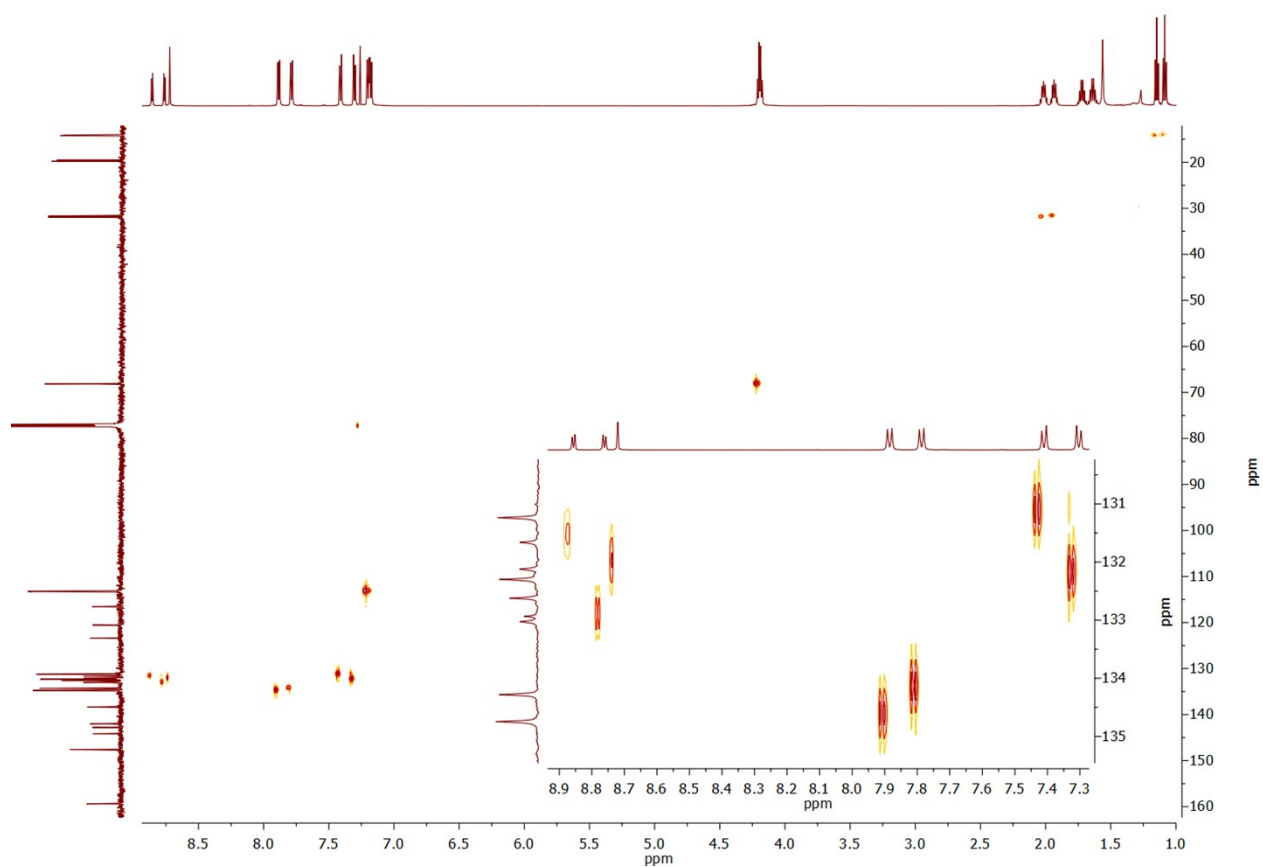

Figure S 54. <sup>1</sup>H-<sup>13</sup>C HSQC spectrum of **5a** (CDCl<sub>3</sub>).

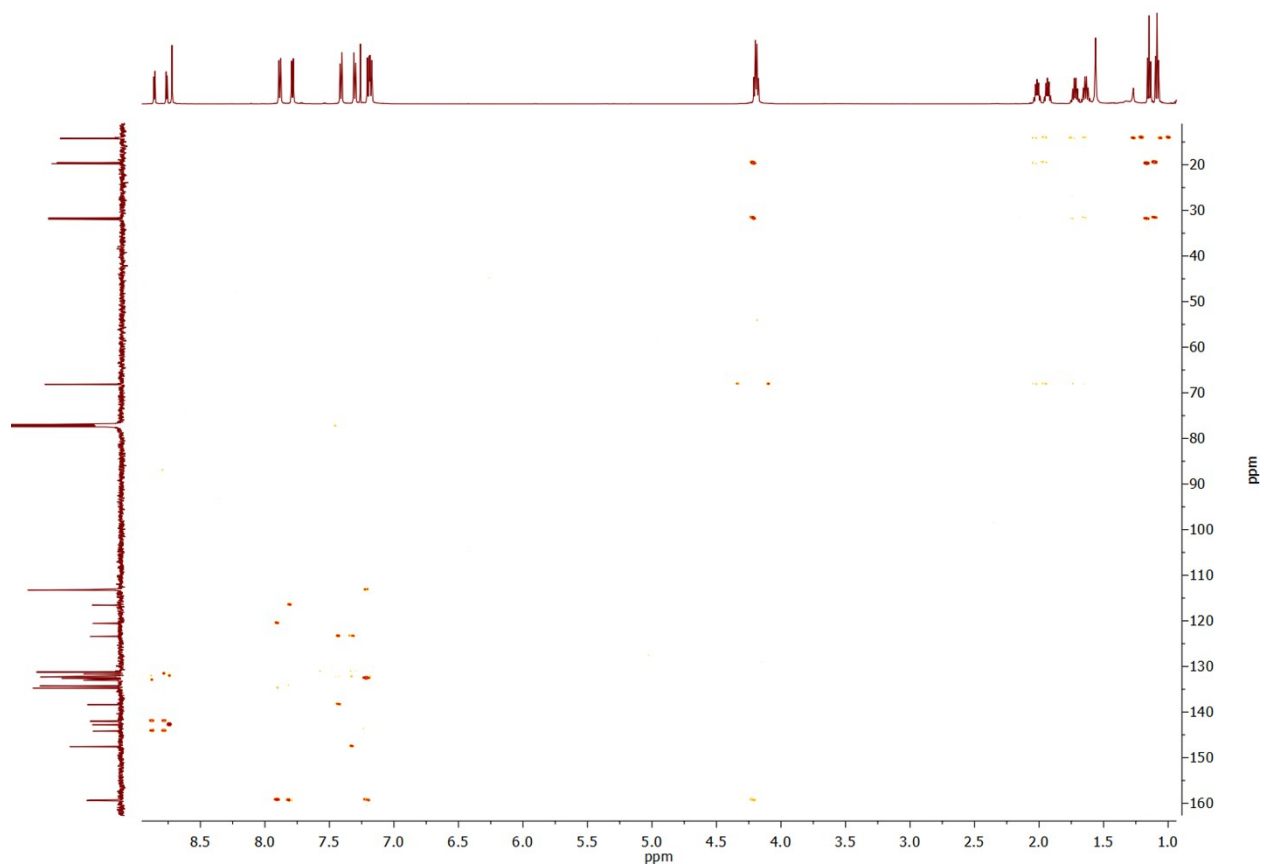

Figure S 55.  $^1\text{H}$ - $^{13}\text{C}$  HMBC spectrum of **5a** ( $\text{CDCl}_3$ ).

### Spectral data of **5b**

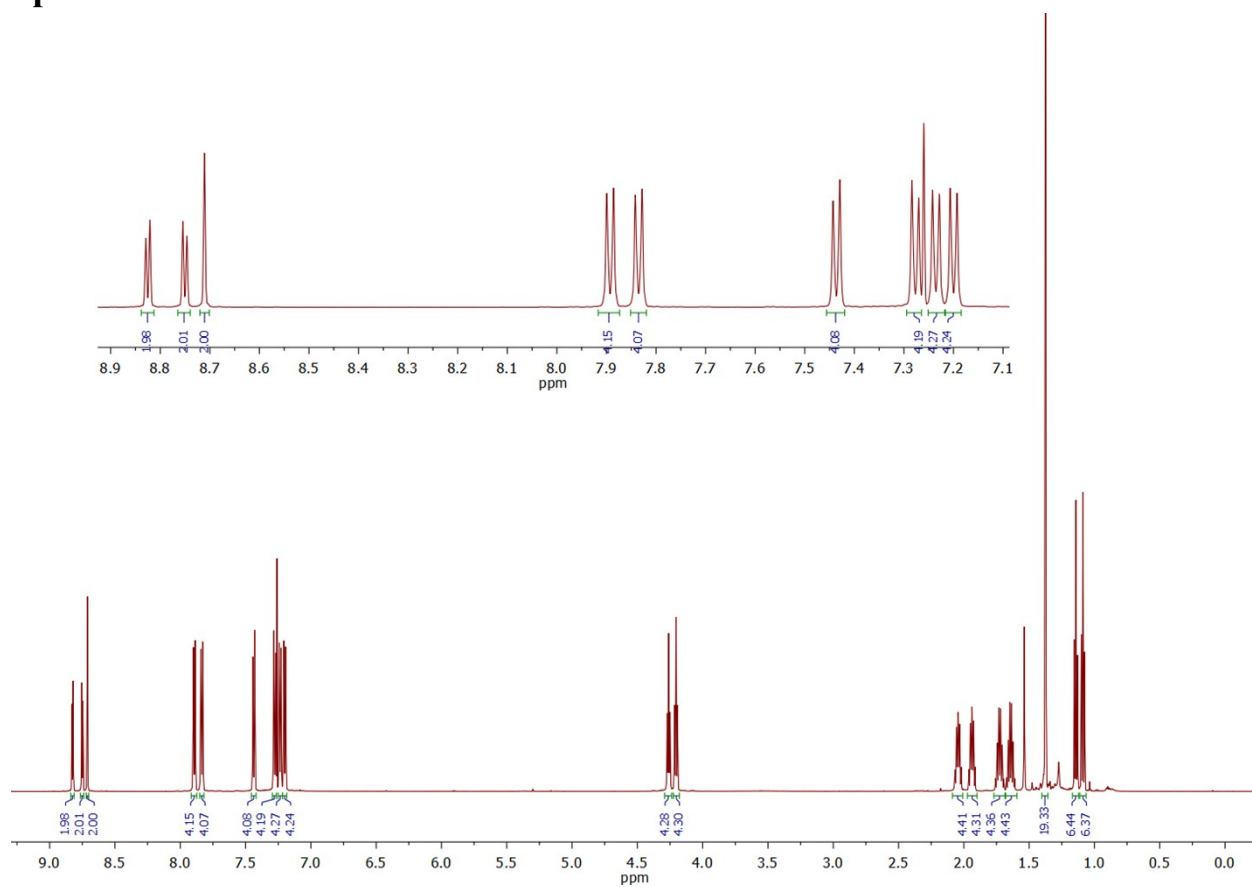

Figure S 56.  $^1\text{H}$ -NMR spectrum of **5b** ( $\text{CDCl}_3$ ).

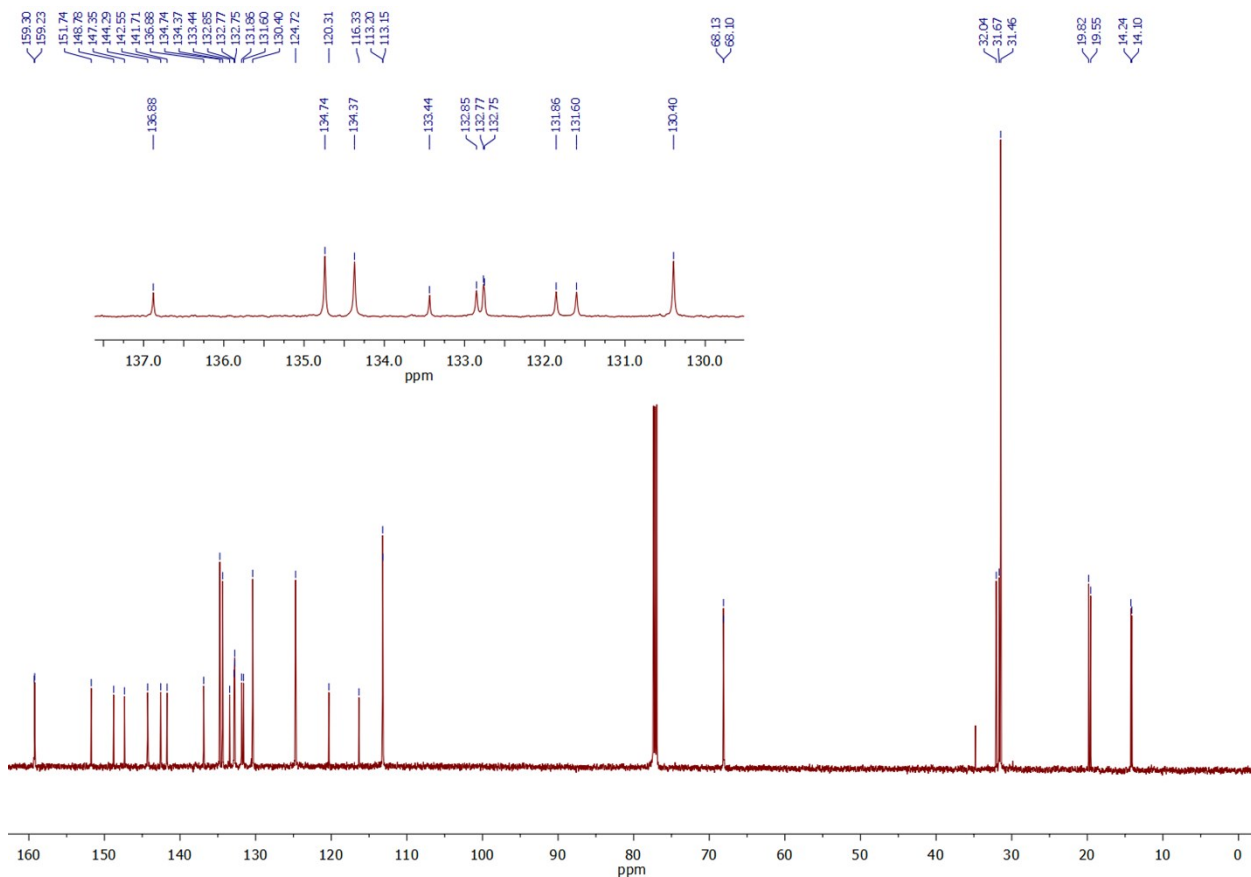

Figure S 57.  $^{13}\text{C}$ -NMR spectrum of **5b** ( $\text{CDCl}_3$ ).

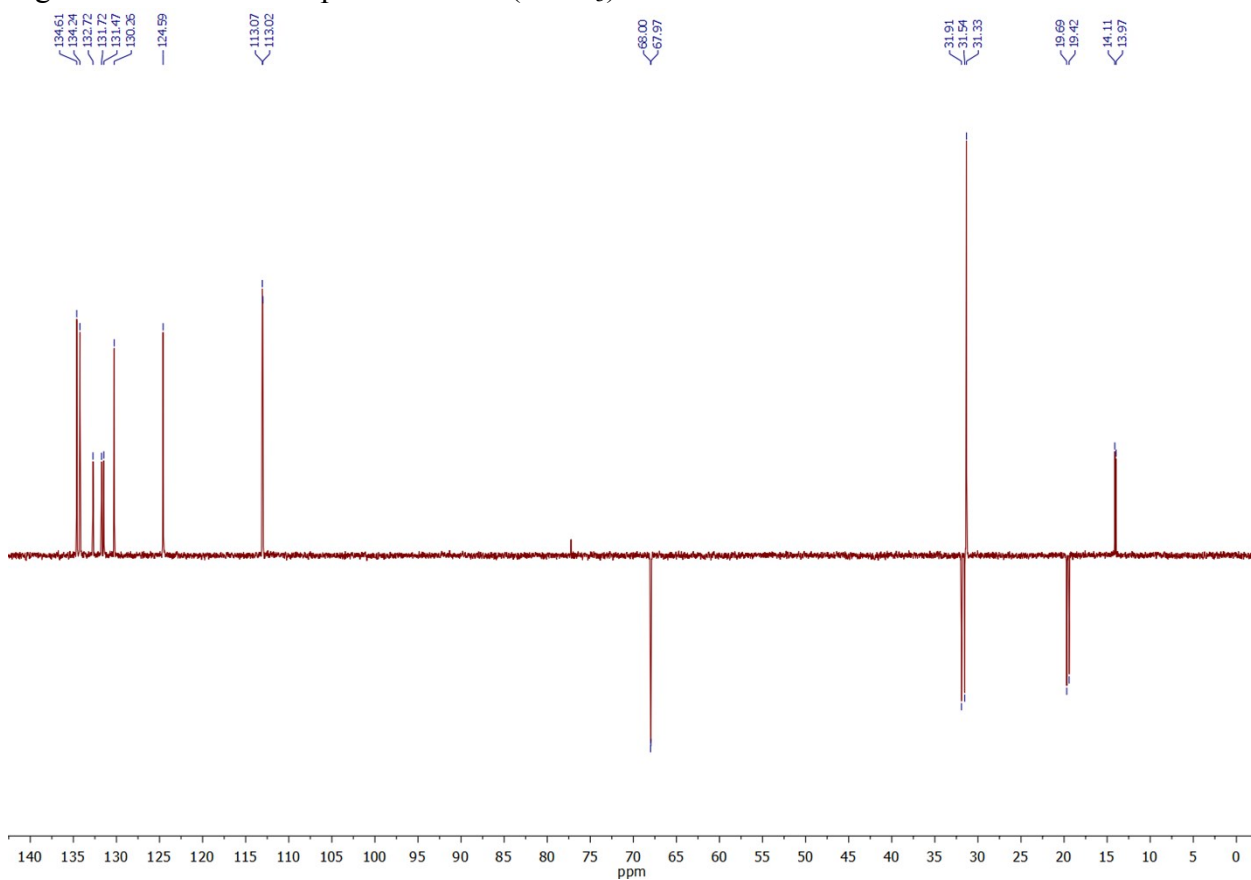

Figure S 58.  $^{13}\text{C}$  DEPT-135 spectrum of **5b** ( $\text{CDCl}_3$ ).

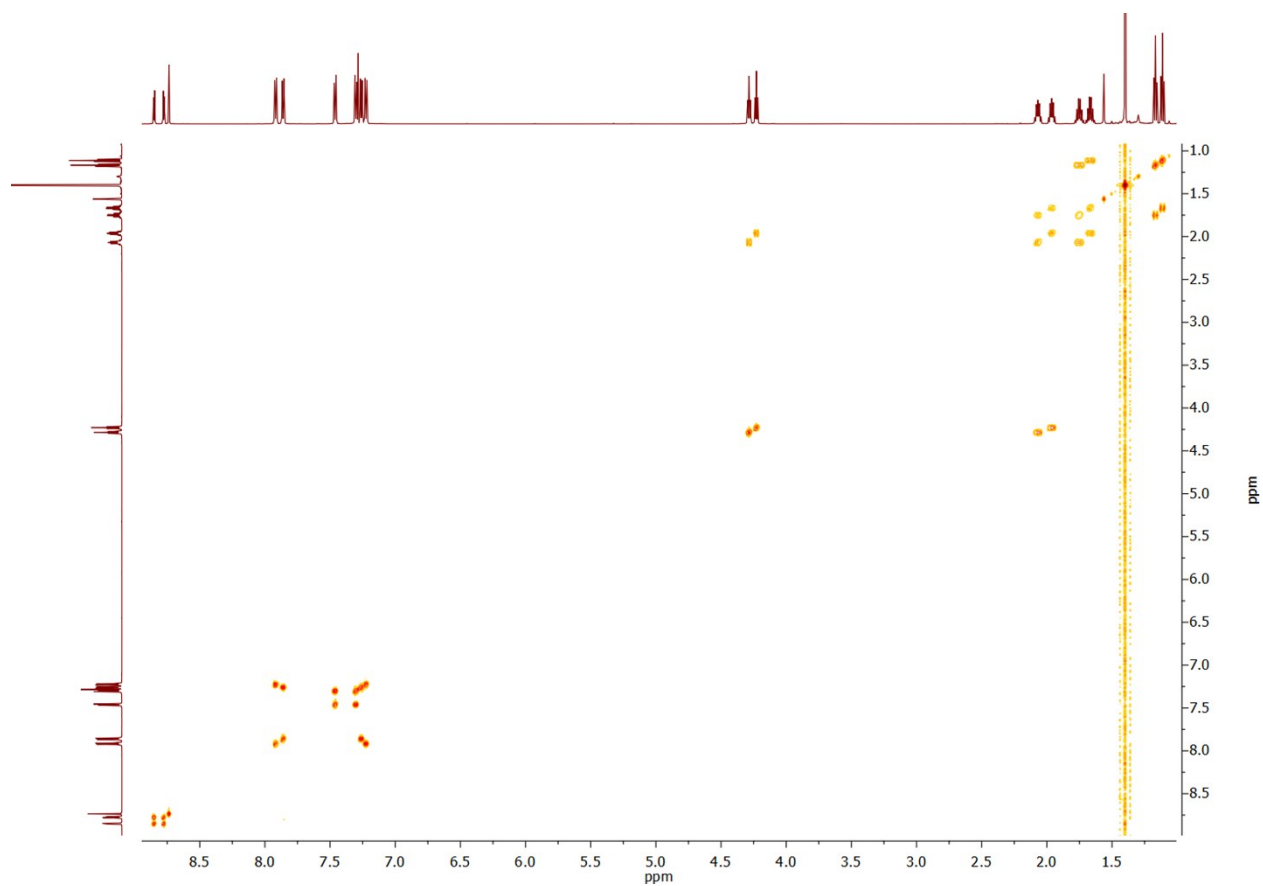

Figure S 59. COSY spectrum of **5b** (CDCl<sub>3</sub>).

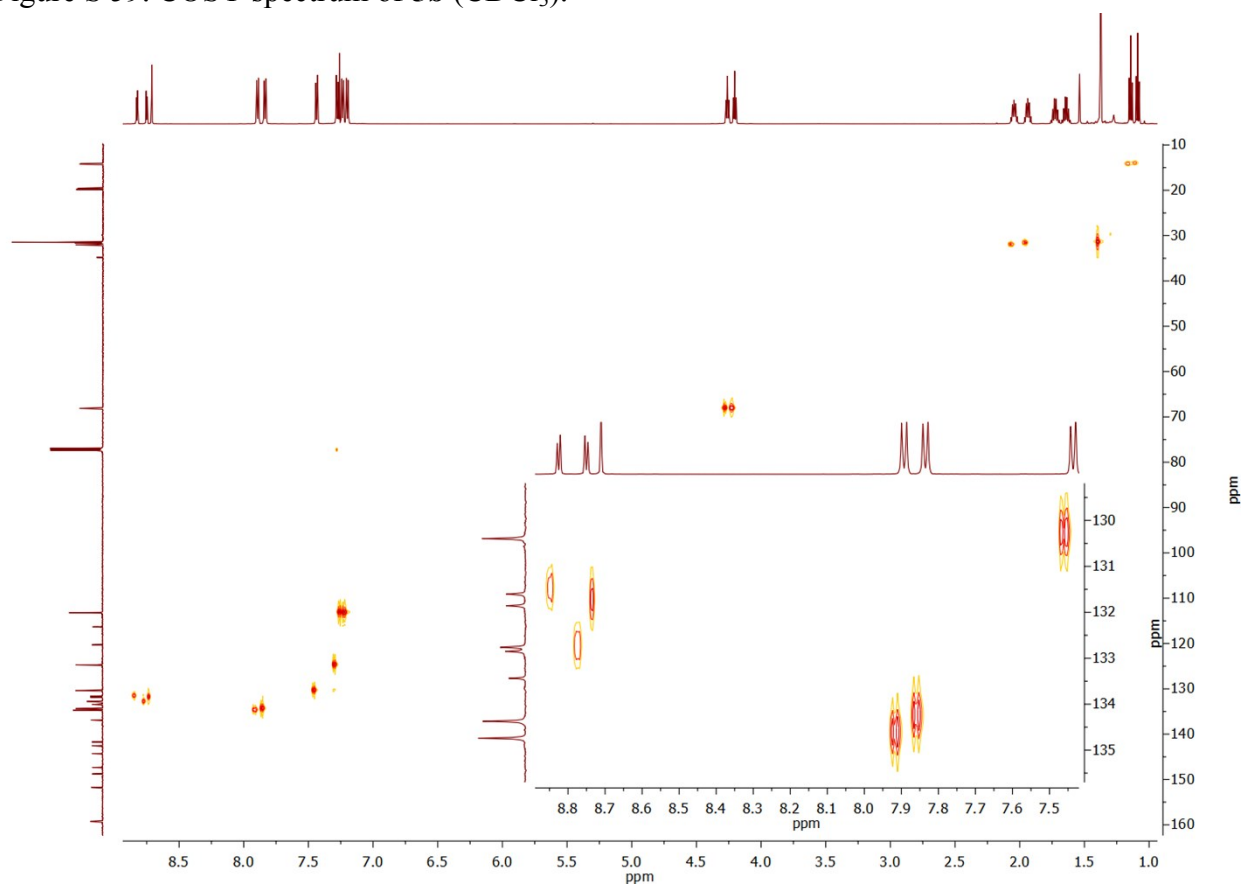

Figure S 60. <sup>1</sup>H-<sup>13</sup>C HSQC spectrum of **5b** (CDCl<sub>3</sub>).

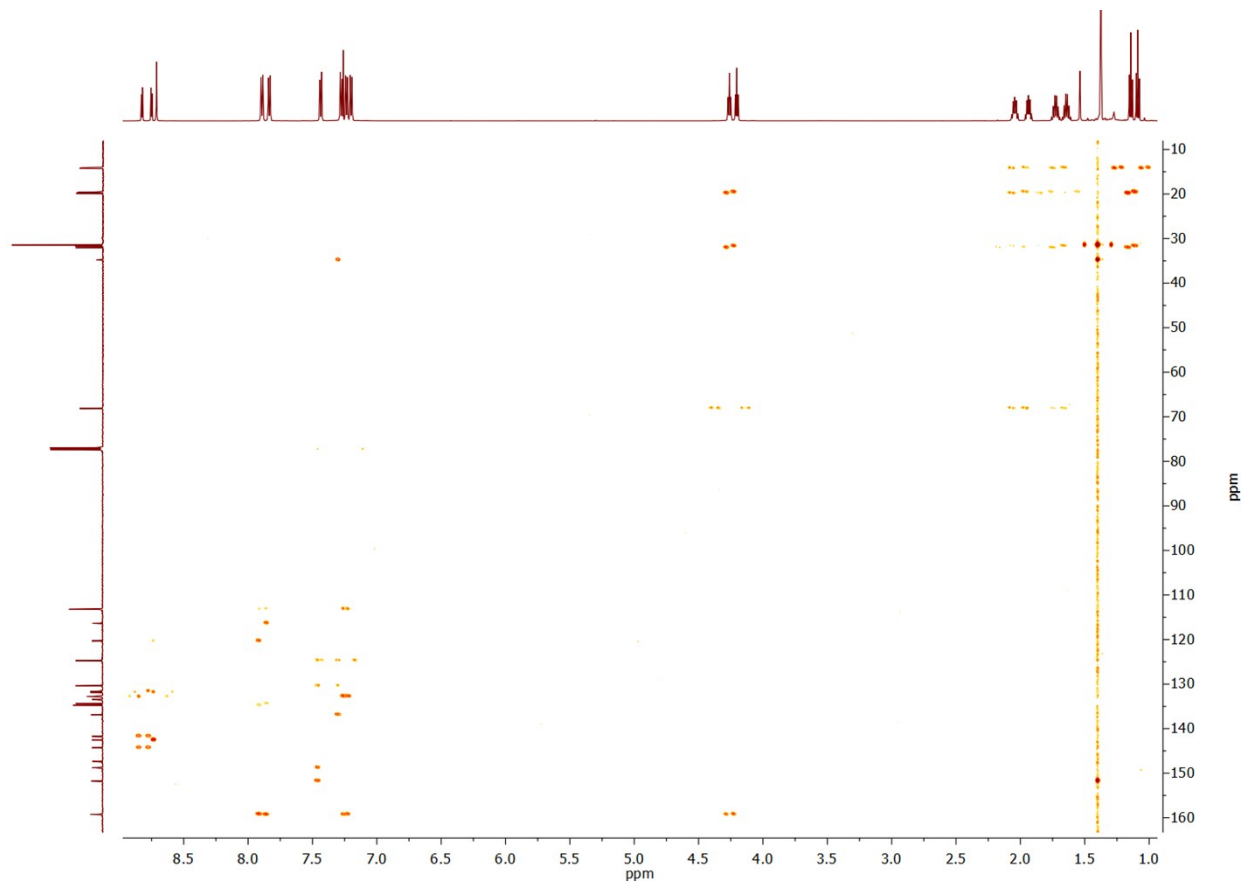

Figure S 61.  $^1\text{H}$ - $^{13}\text{C}$  HMBC spectrum of **5b** ( $\text{CDCl}_3$ ).

### Spectral data of **5c**

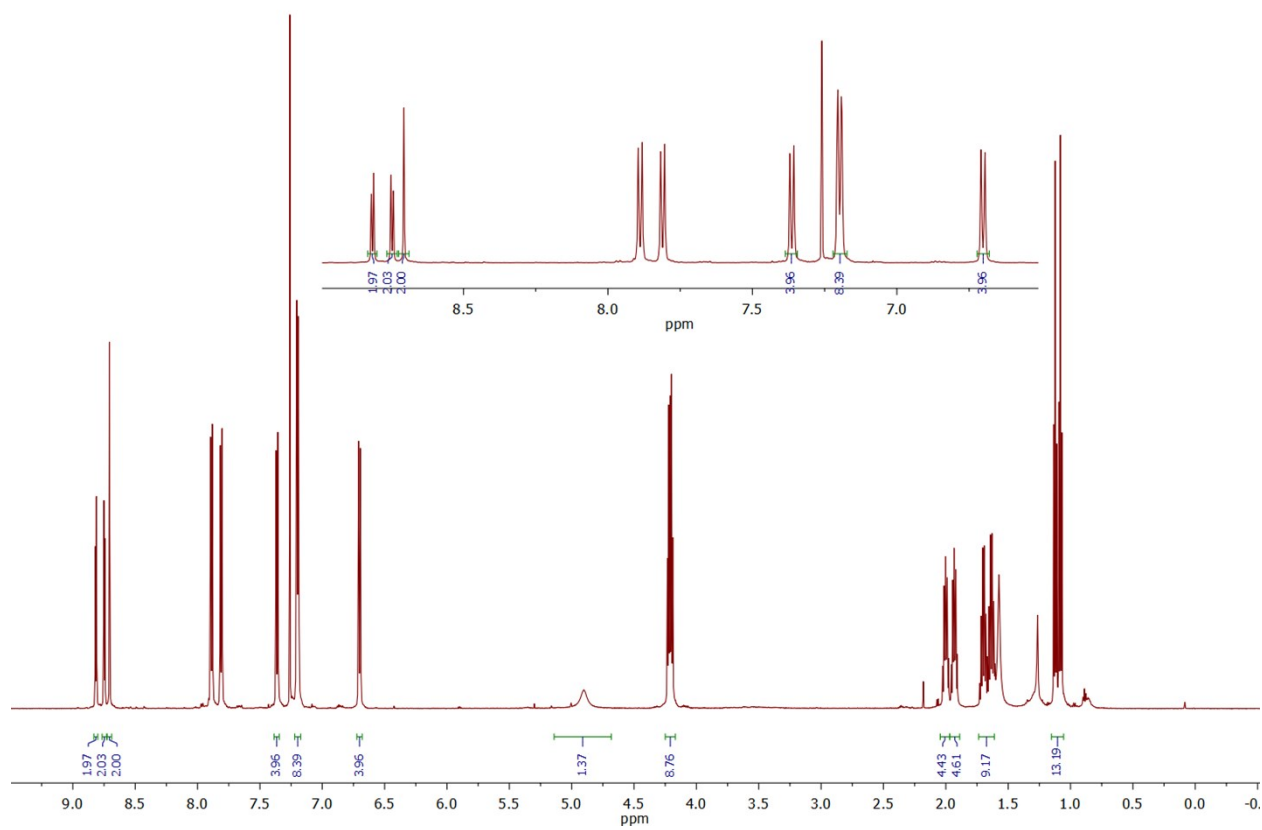

Figure S 62.  $^1\text{H}$ -NMR spectrum of **5c** ( $\text{CDCl}_3$ ).



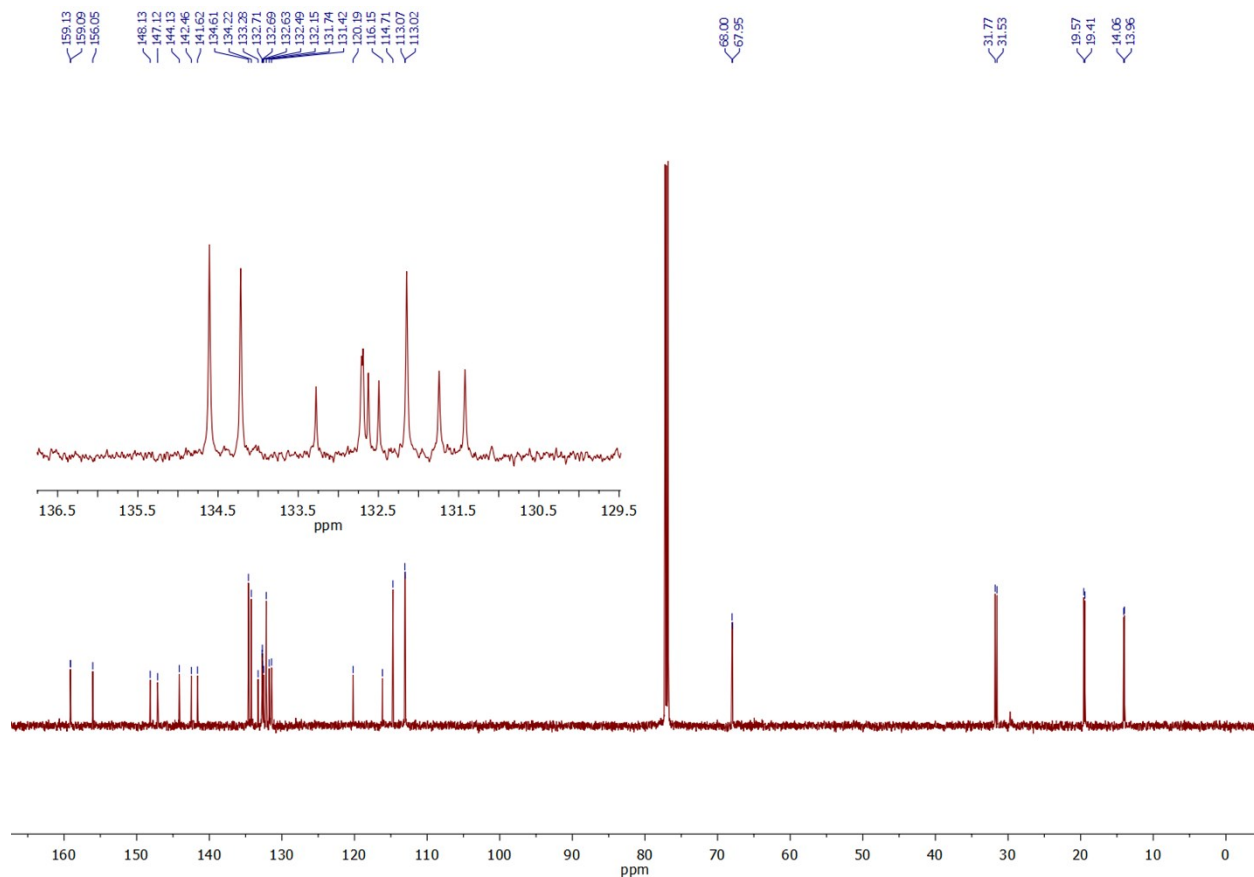

Figure S 63.  $^{13}\text{C}$ -NMR spectrum of **5c** ( $\text{CDCl}_3$ ).

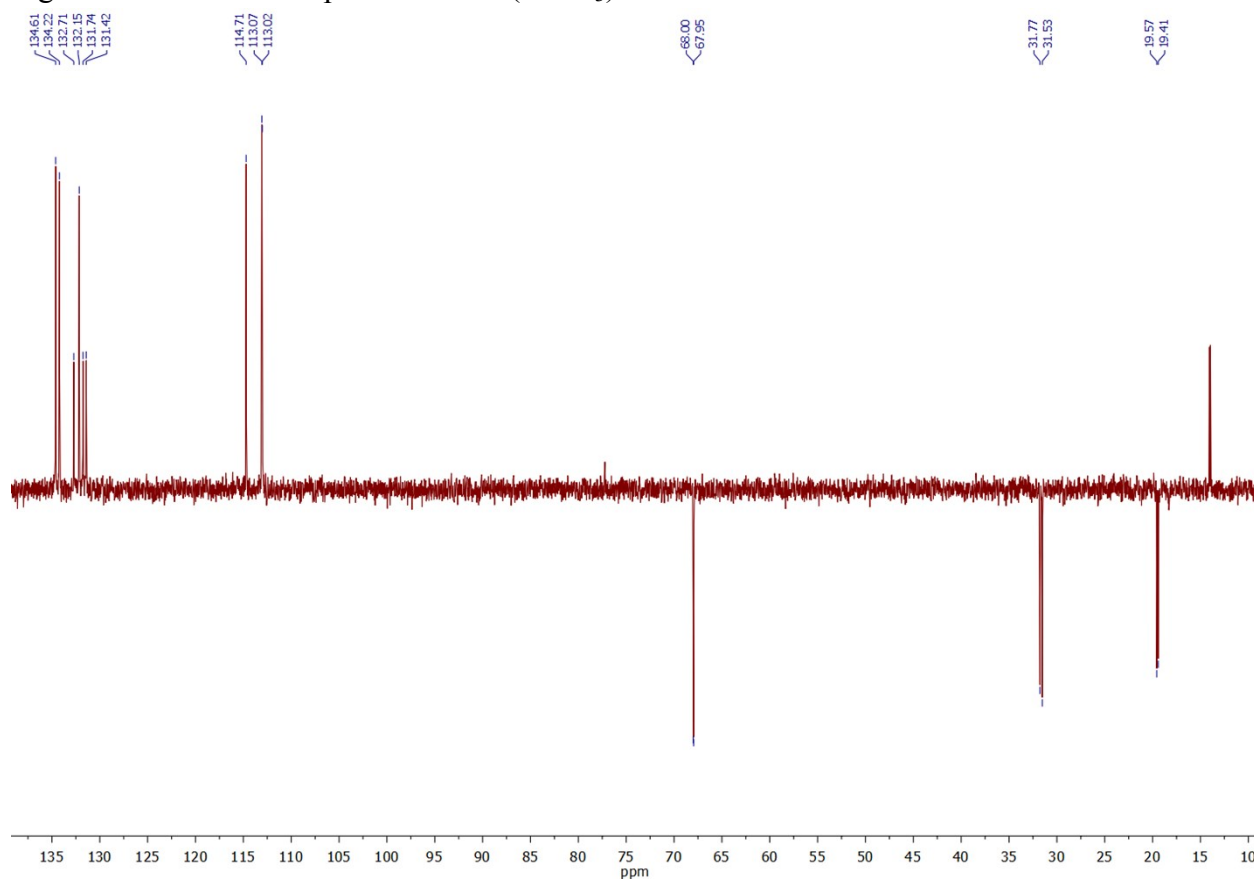

Figure S 64.  $^{13}\text{C}$  DEPT-135 spectrum of **5c** ( $\text{CDCl}_3$ ).

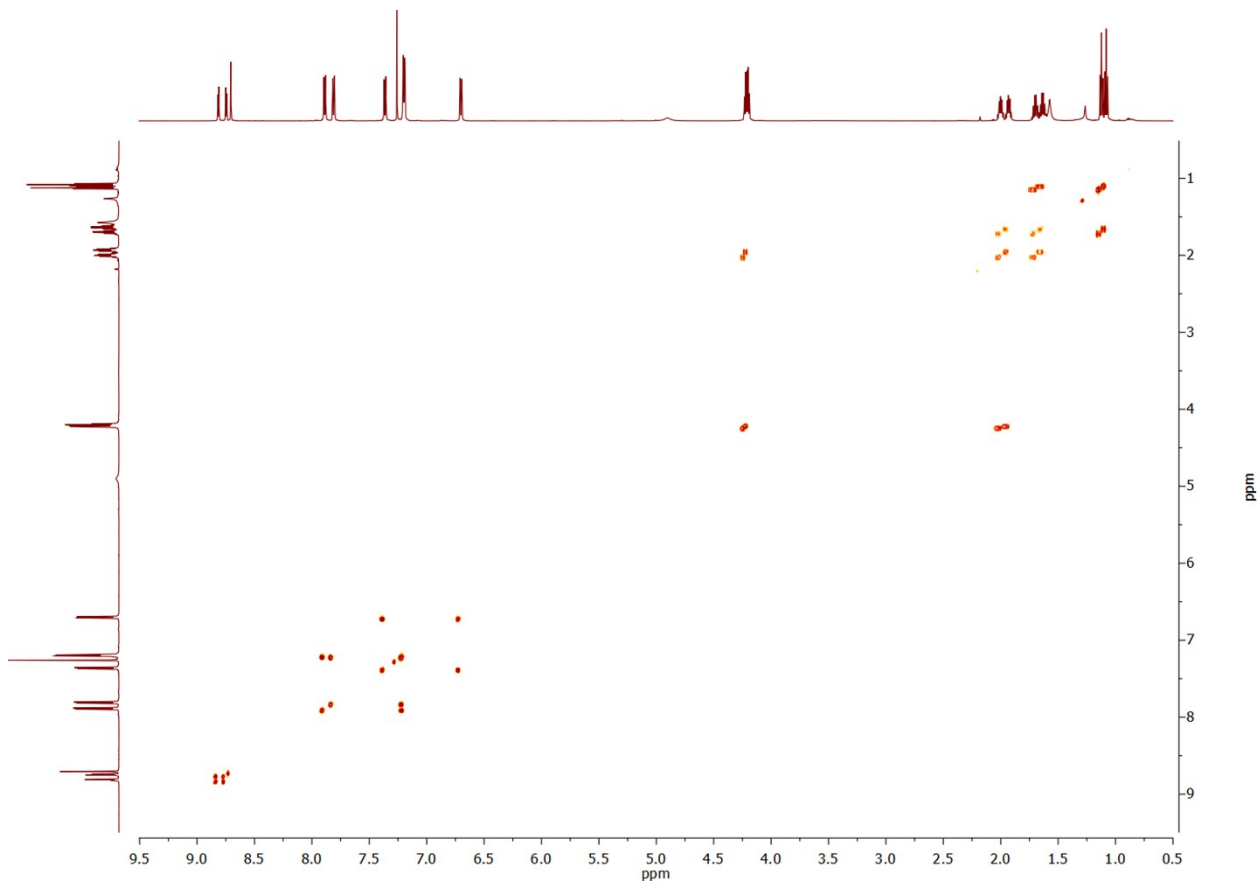

Figure S 65. COSY spectrum of **5c** (CDCl<sub>3</sub>).

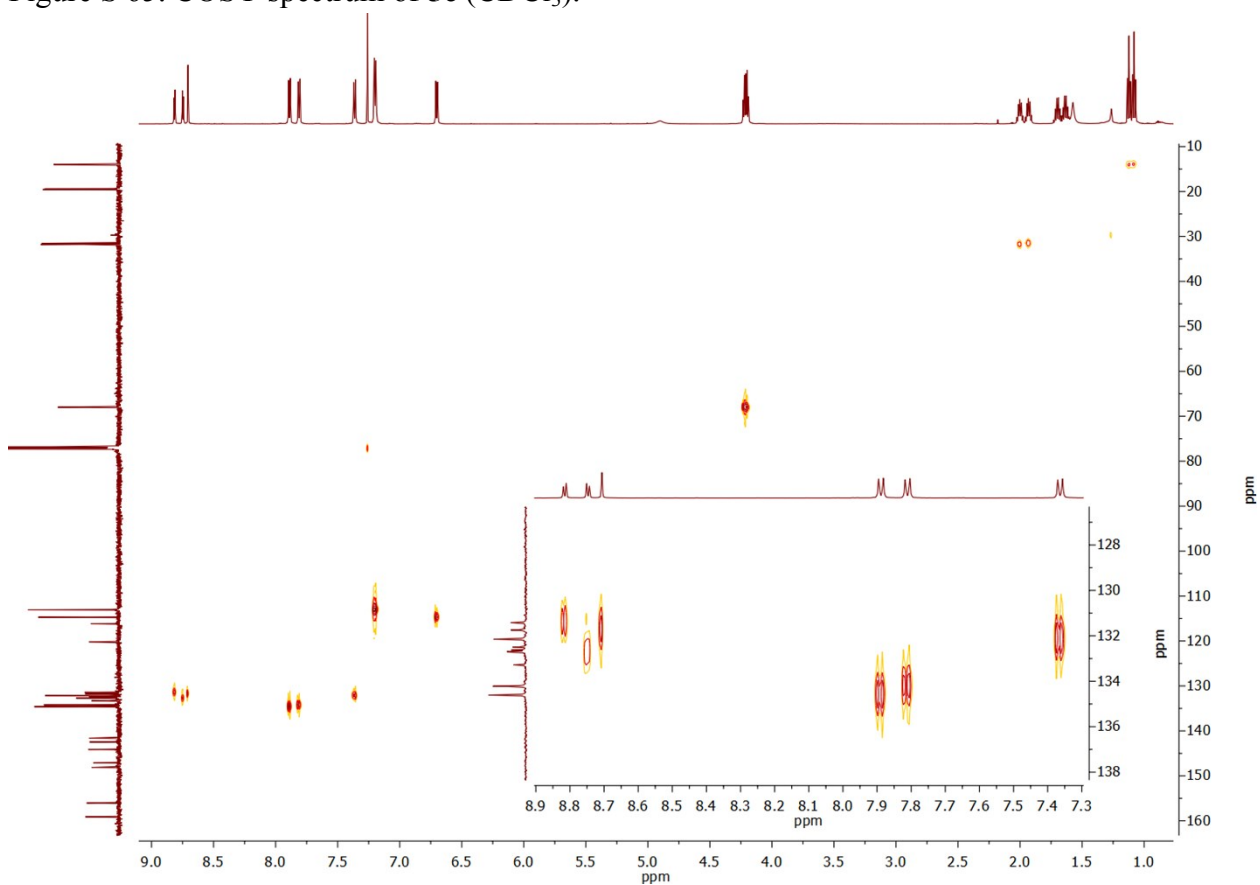

Figure S 66. <sup>1</sup>H-<sup>13</sup>C HSQC spectrum of **5c** (CDCl<sub>3</sub>).

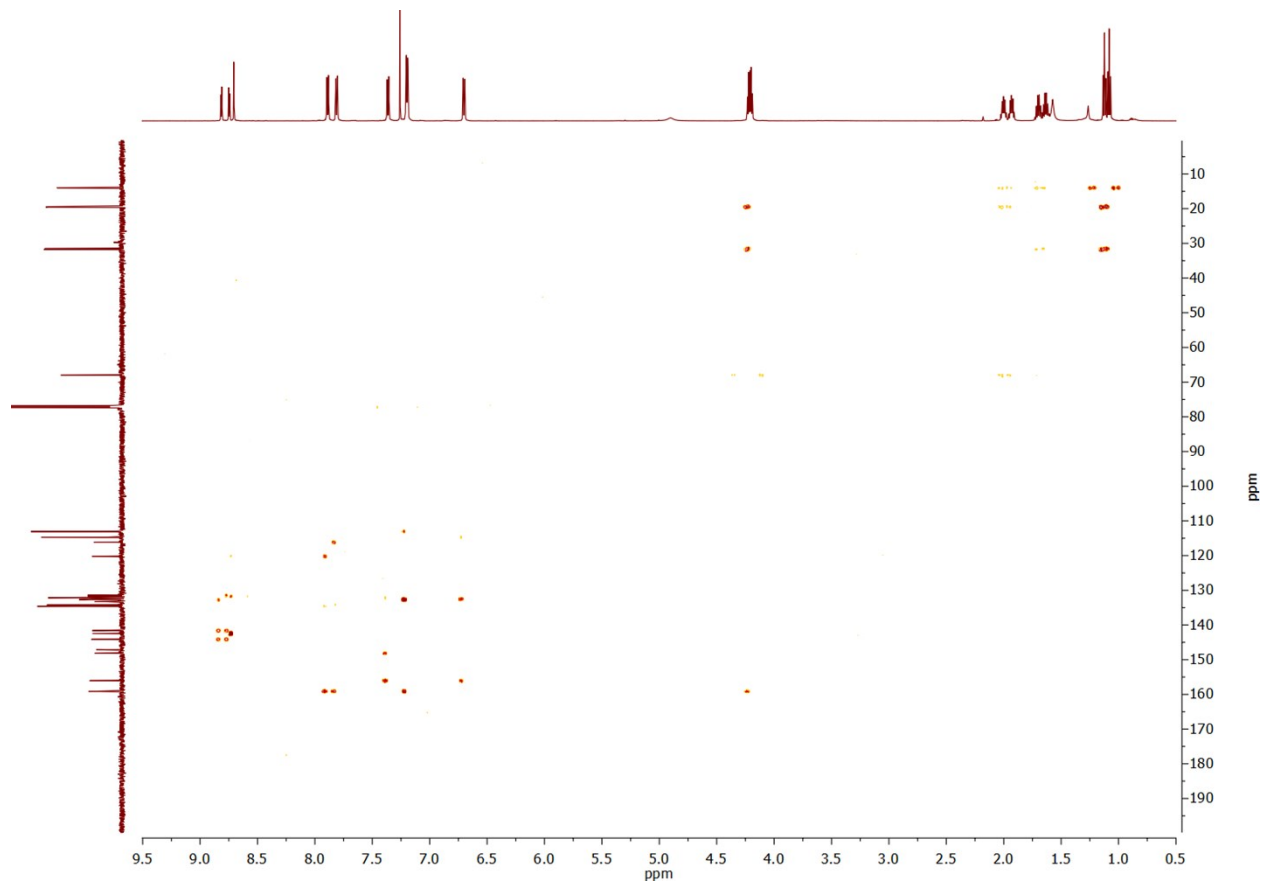

Figure S 67.  $^1\text{H}$ - $^{13}\text{C}$  HMBC spectrum of **5c** ( $\text{CDCl}_3$ ).

### Spectral data of **5e**

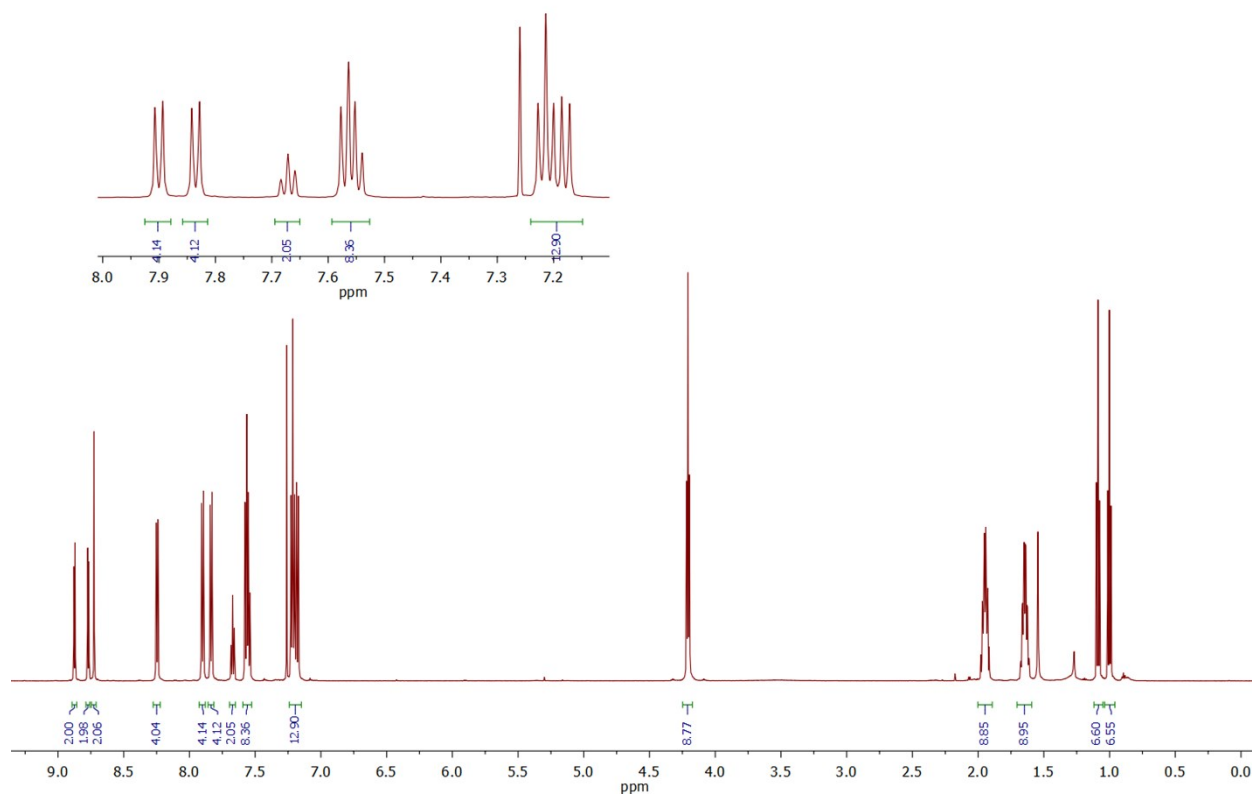

Figure S 68.  $^1\text{H}$ -NMR spectrum of **5e** ( $\text{CDCl}_3$ ).

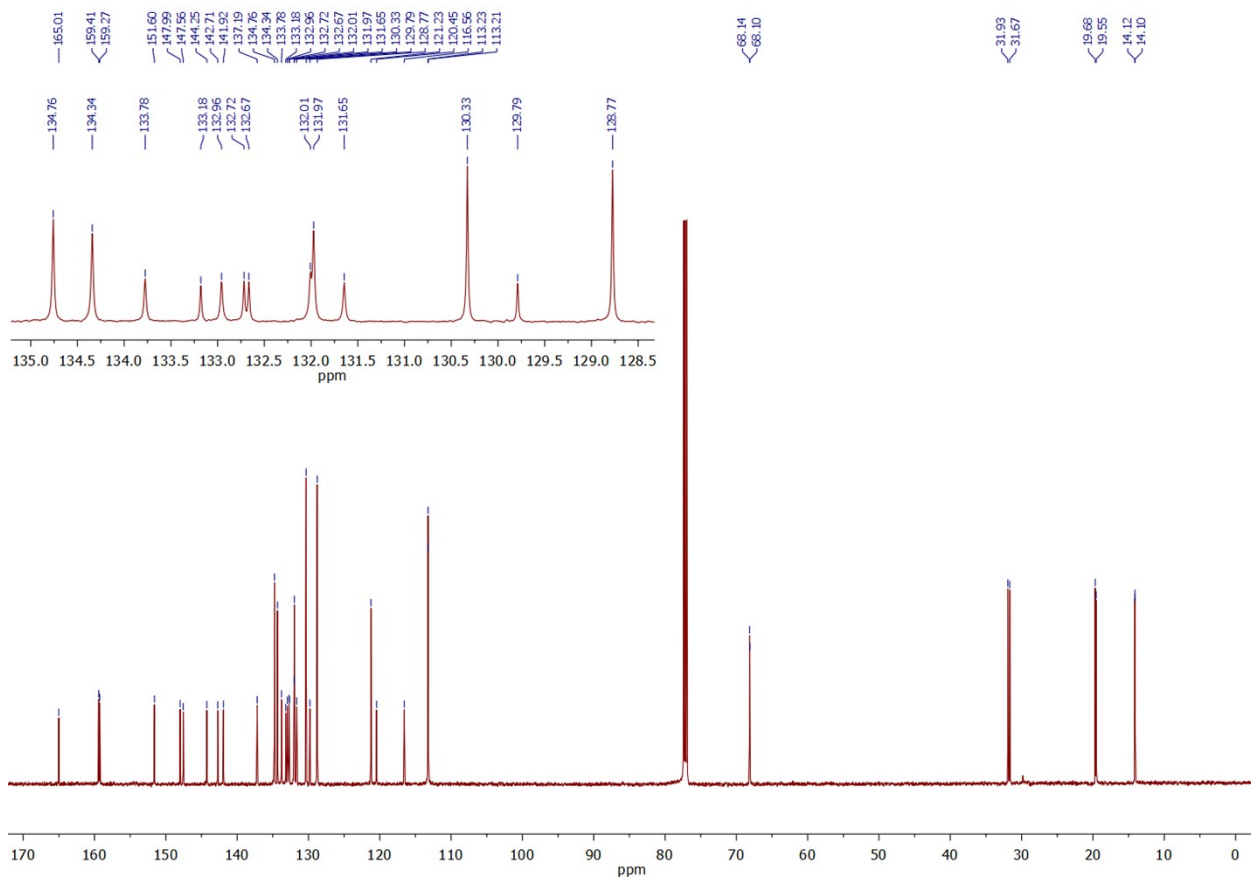

Figure S 69.  $^{13}\text{C}$ -NMR spectrum of **5e** ( $\text{CDCl}_3$ ).

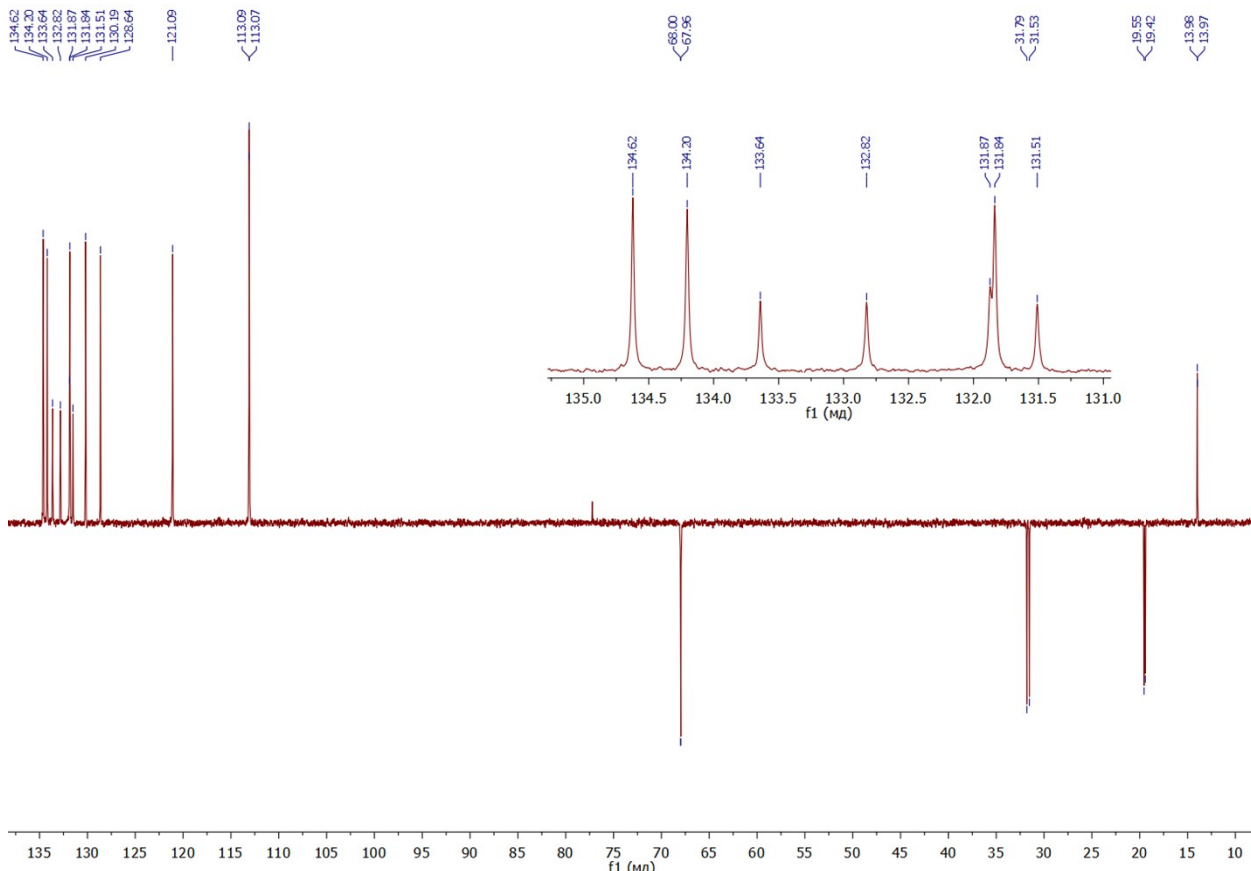

Figure S 70.  $^{13}\text{C}$  DEPT-135 spectrum of **5e** ( $\text{CDCl}_3$ ).

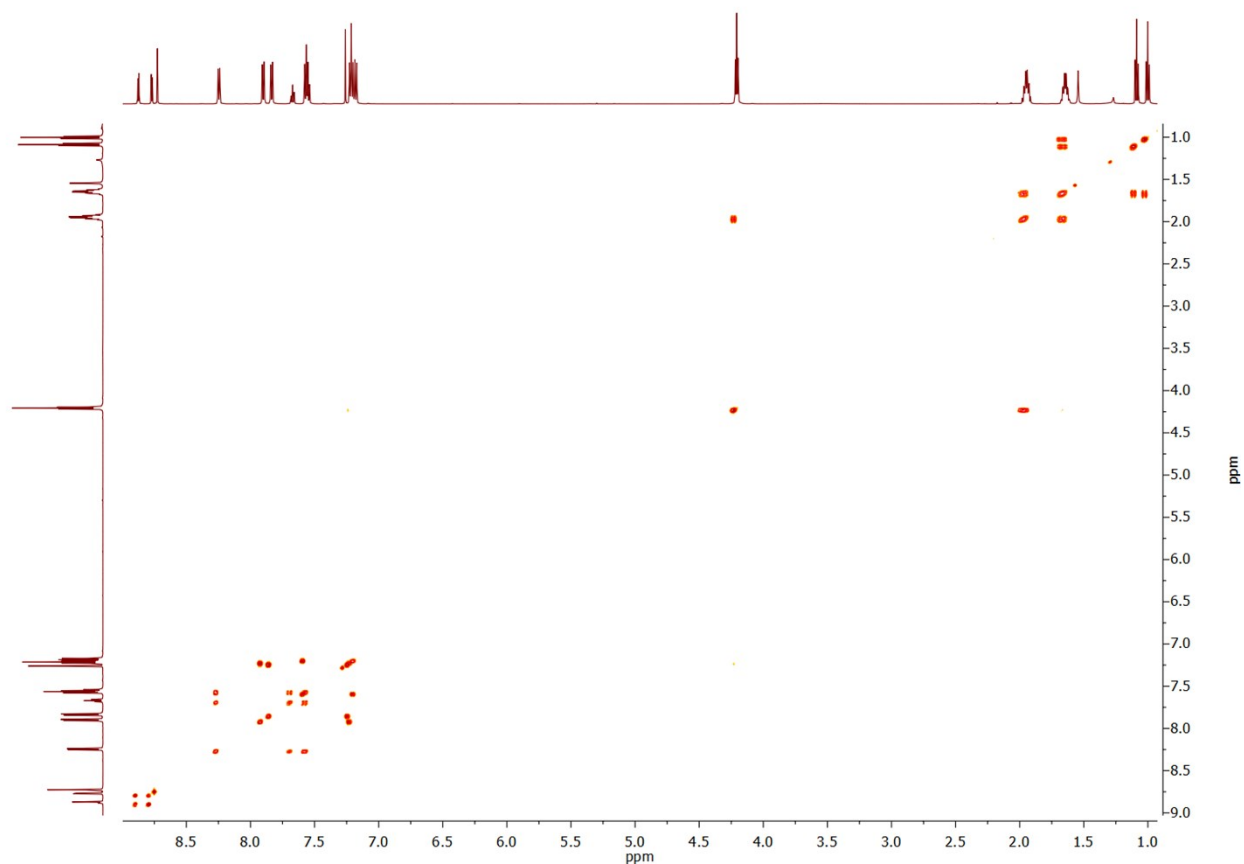

Figure S 71. COSY spectrum of **5e** (CDCl<sub>3</sub>).

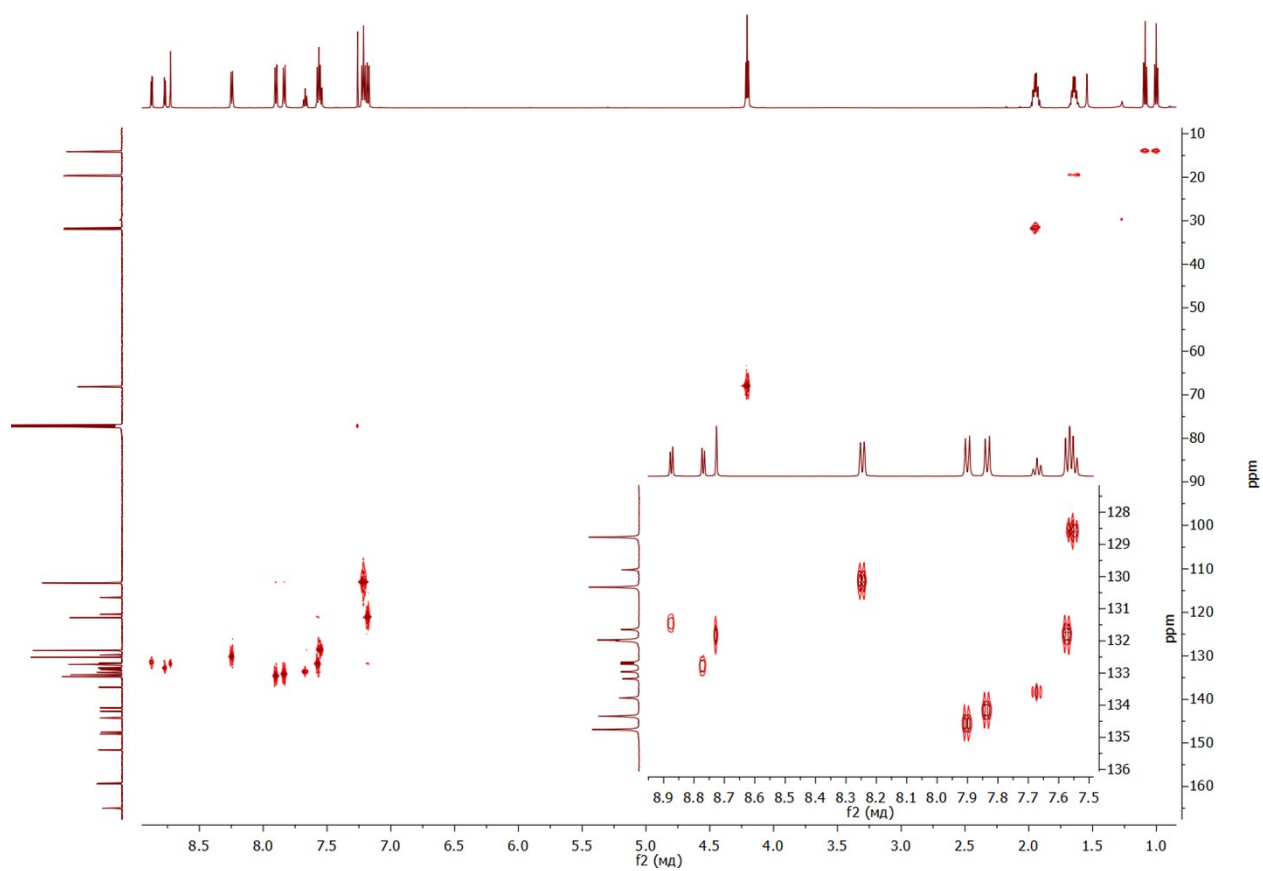

Figure S 72. <sup>1</sup>H-<sup>13</sup>C HSQC spectrum of **5e** (CDCl<sub>3</sub>).

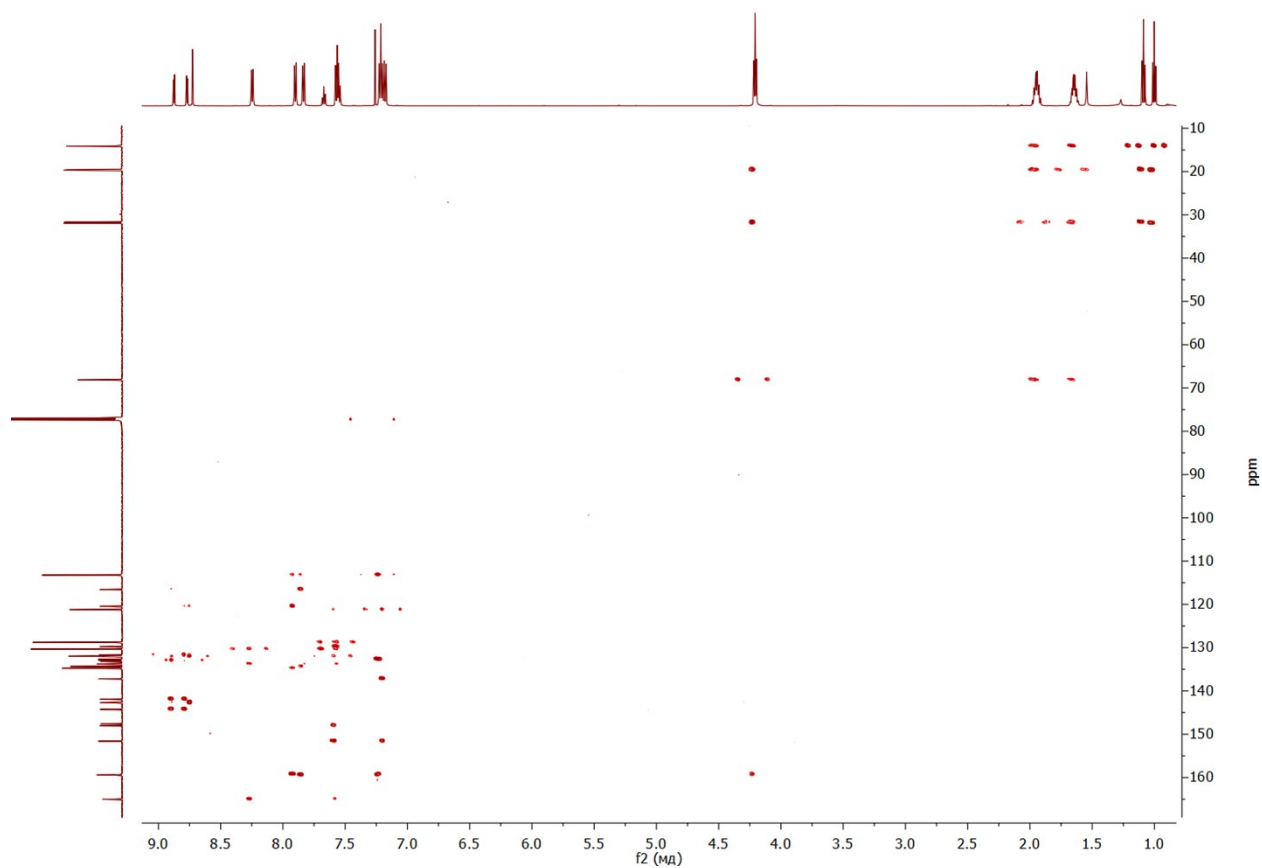

Figure S 73.  $^1\text{H}$ - $^{13}\text{C}$  HMBC spectrum of **5e** ( $\text{CDCl}_3$ ).

### Spectral data of **5f**

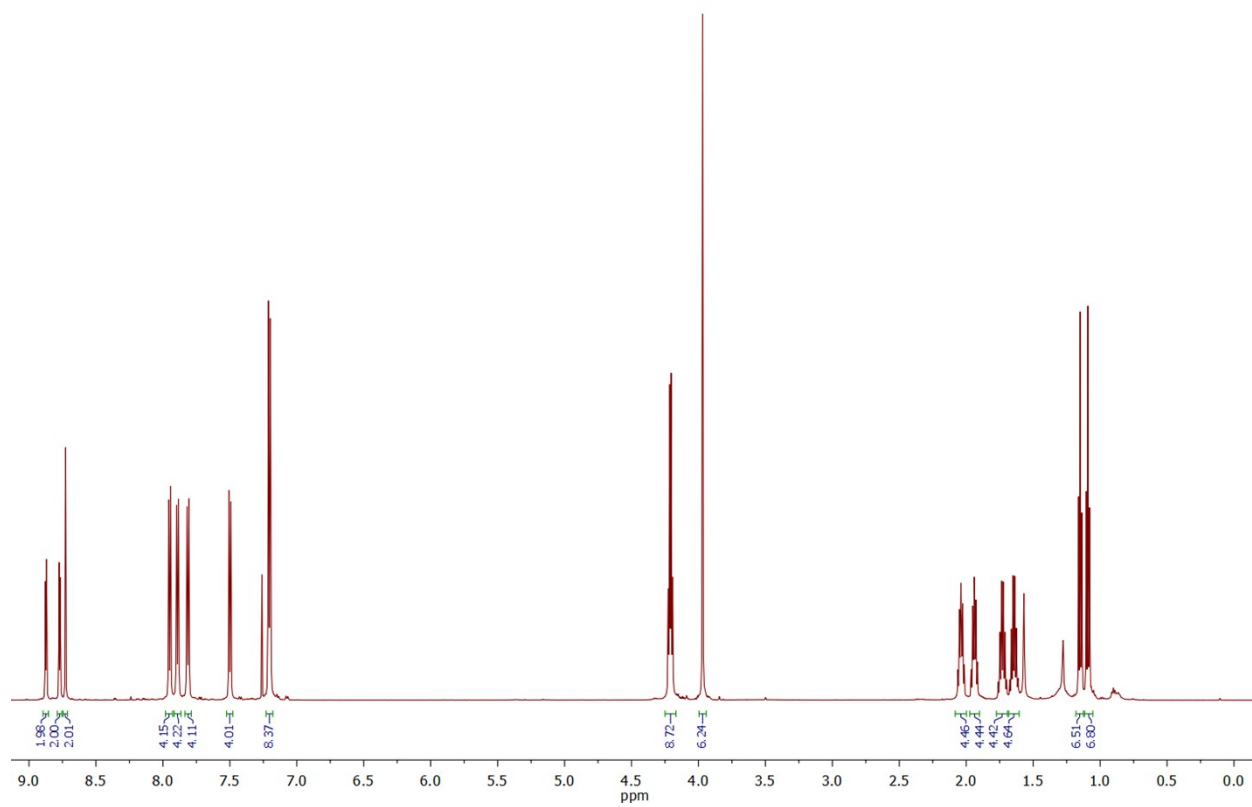

Figure S 74.  $^1\text{H}$ -NMR spectrum of **5f** ( $\text{CDCl}_3$ ).

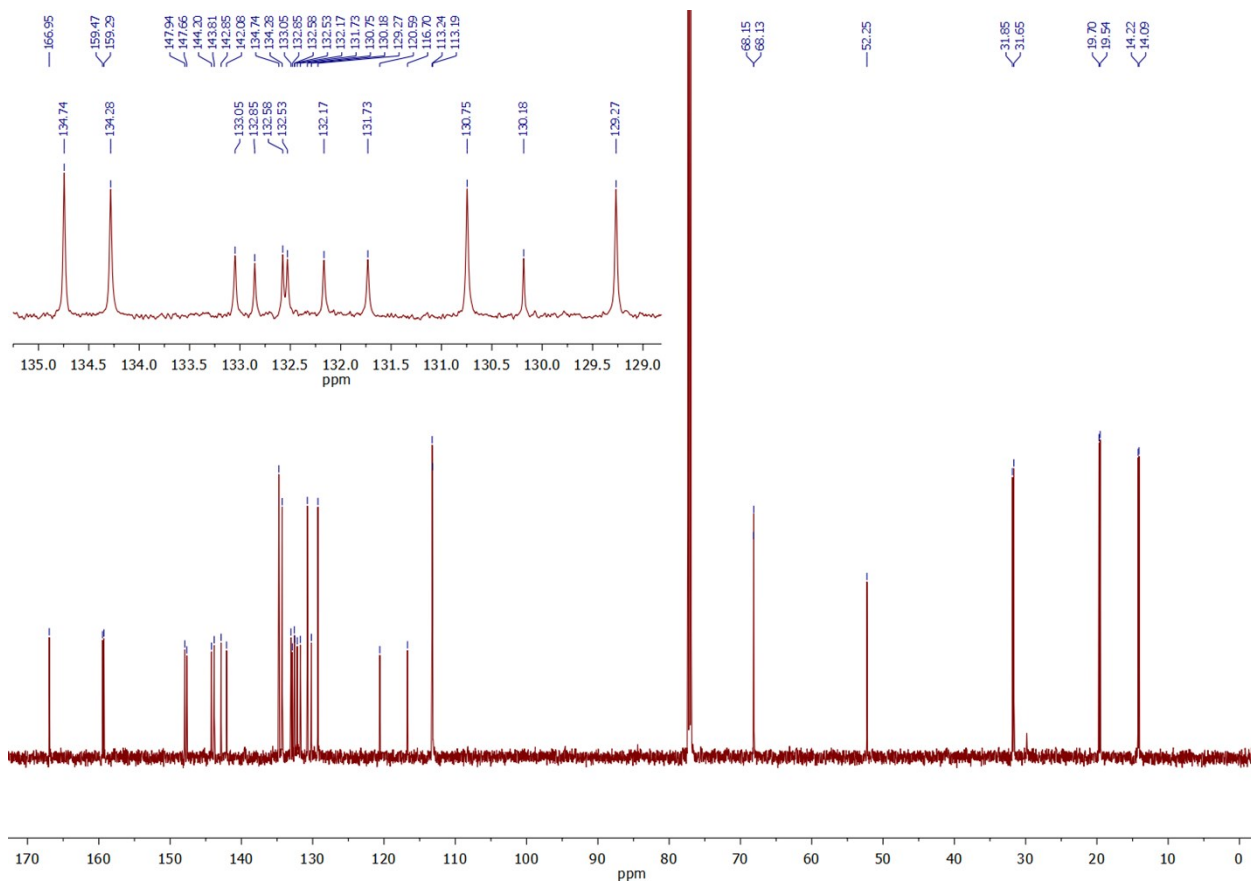

Figure S 75.  $^{13}\text{C}$ -NMR spectrum of **5f** ( $\text{CDCl}_3$ ).

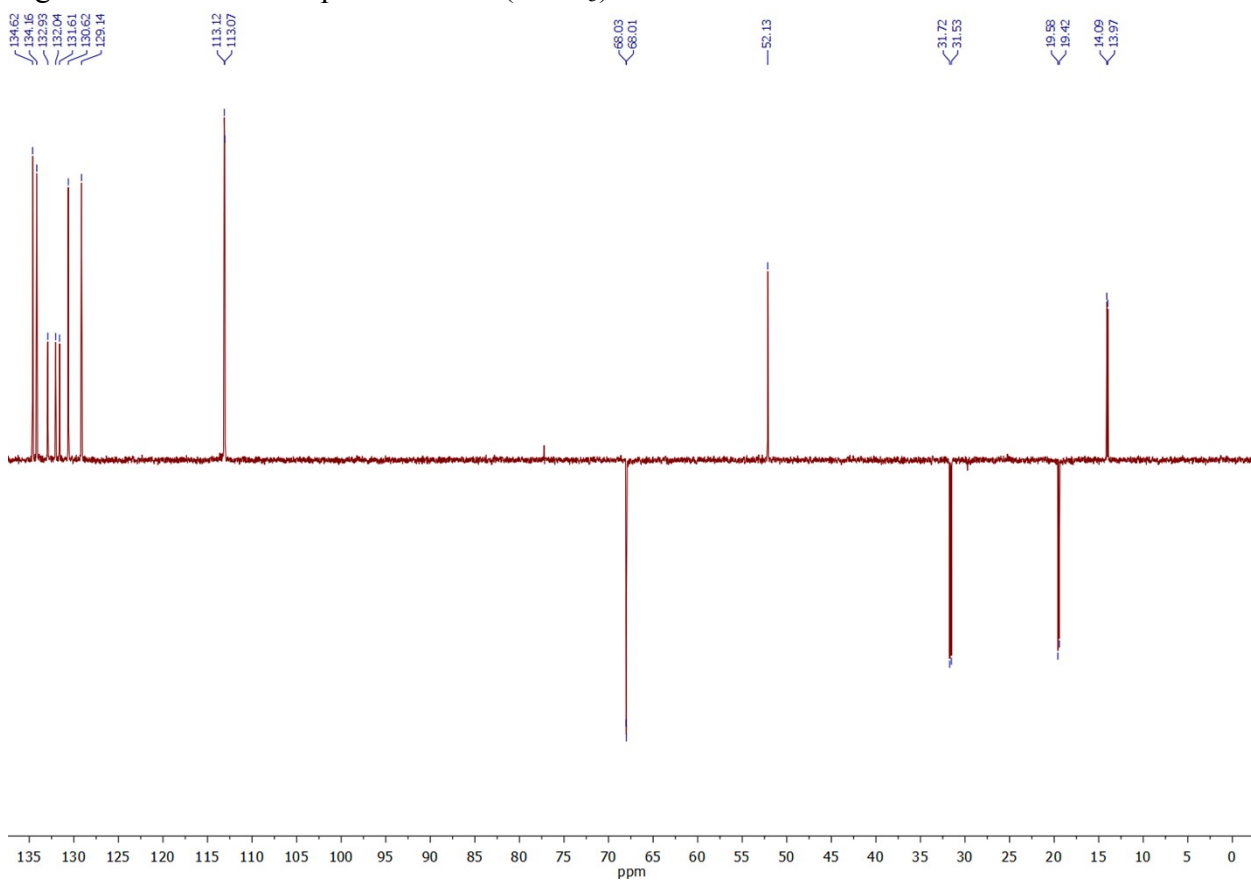

Figure S 76.  $^{13}\text{C}$  DEPT-135 spectrum of **5f** ( $\text{CDCl}_3$ ).

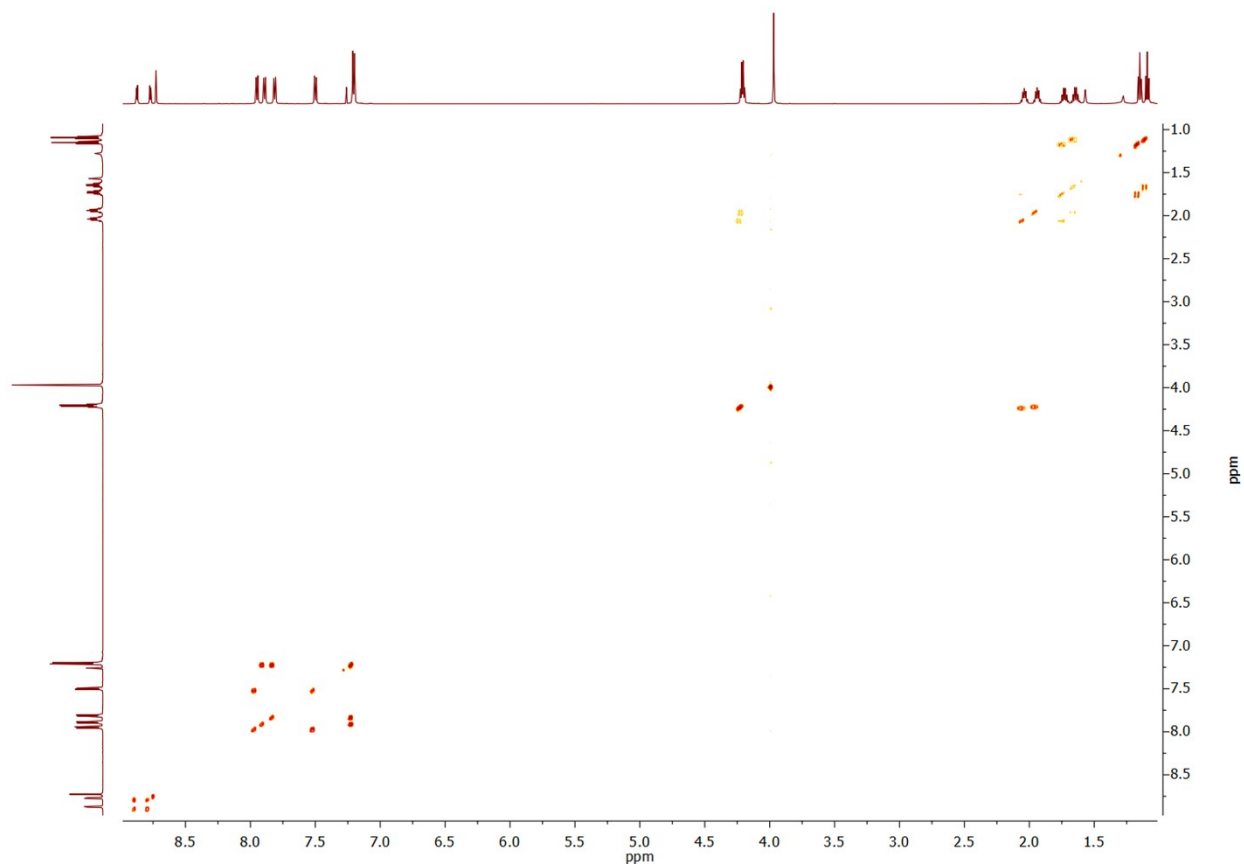

Figure S 77. COSY spectrum of **5f** (CDCl<sub>3</sub>).

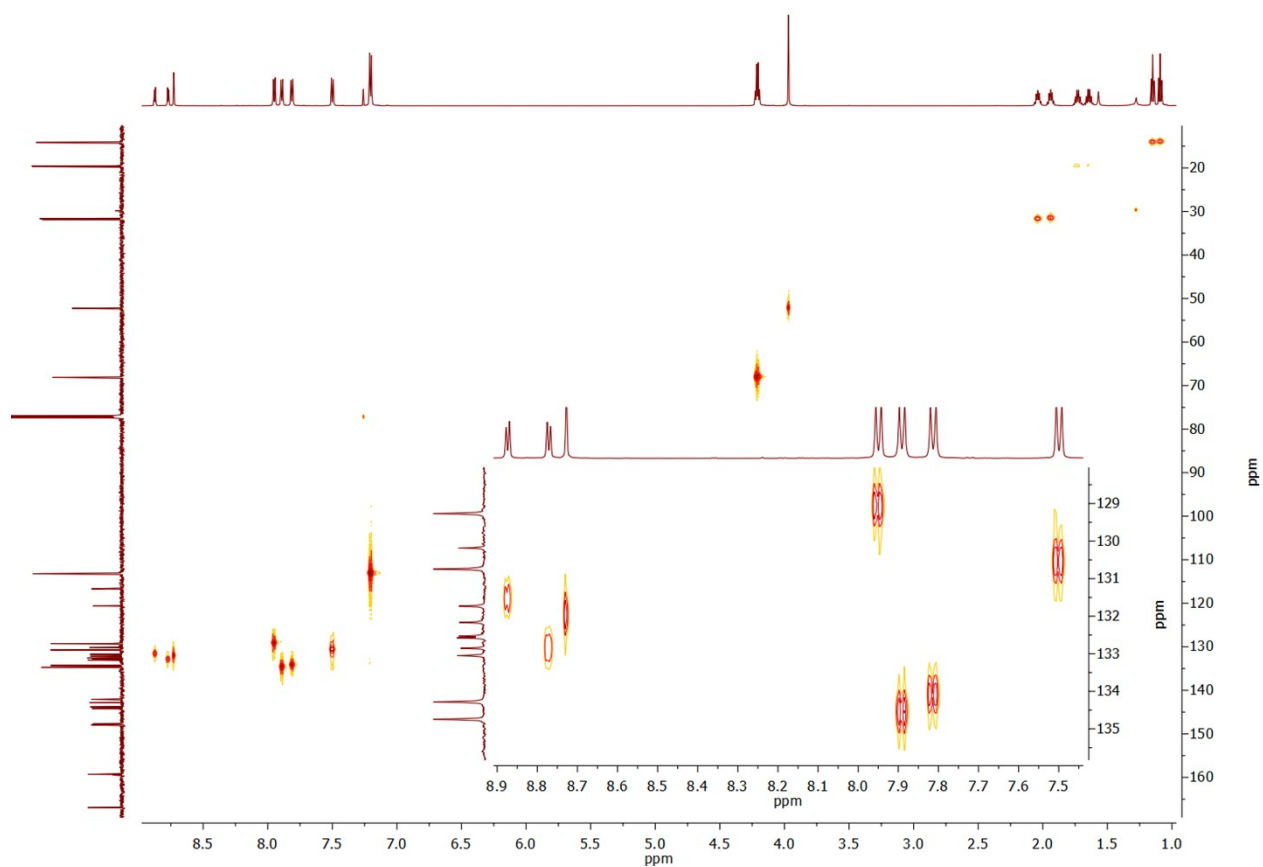

Figure S 78. <sup>1</sup>H-<sup>13</sup>C HSQC spectrum of **5f** (CDCl<sub>3</sub>).



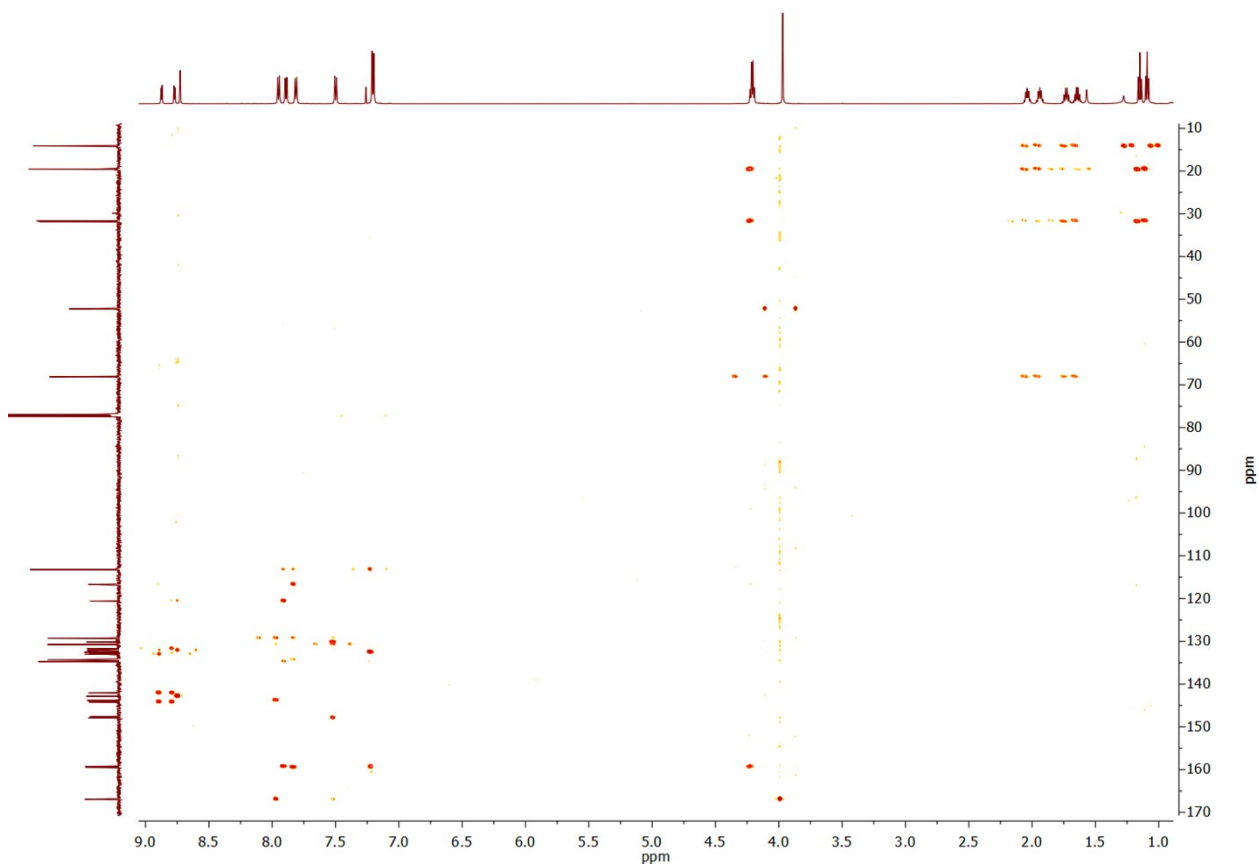

Figure S 79.  $^1\text{H}$ - $^{13}\text{C}$  HMBC spectrum of **5f** ( $\text{CDCl}_3$ ).

### Spectral data of **5g**

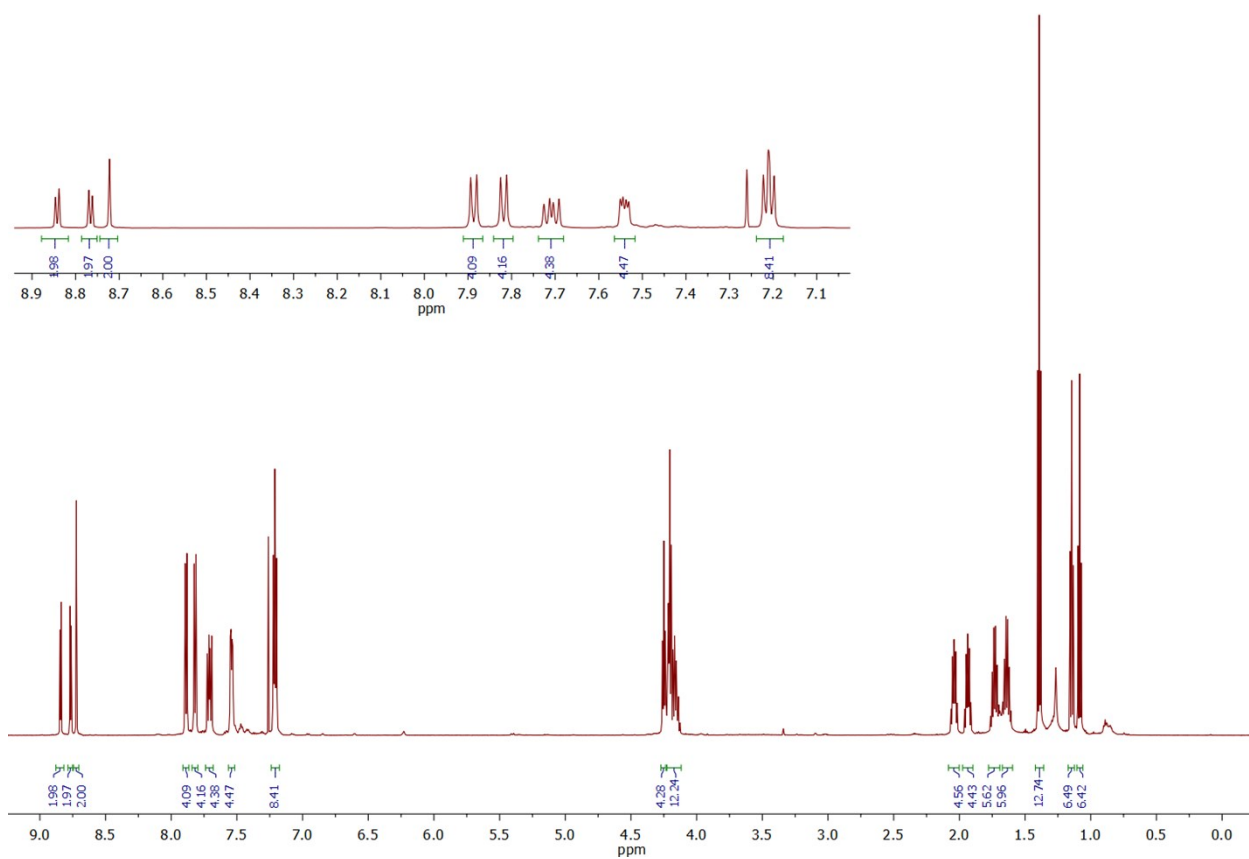

Figure S 80.  $^1\text{H}$ -NMR spectrum of **5g** ( $\text{CDCl}_3$ ).

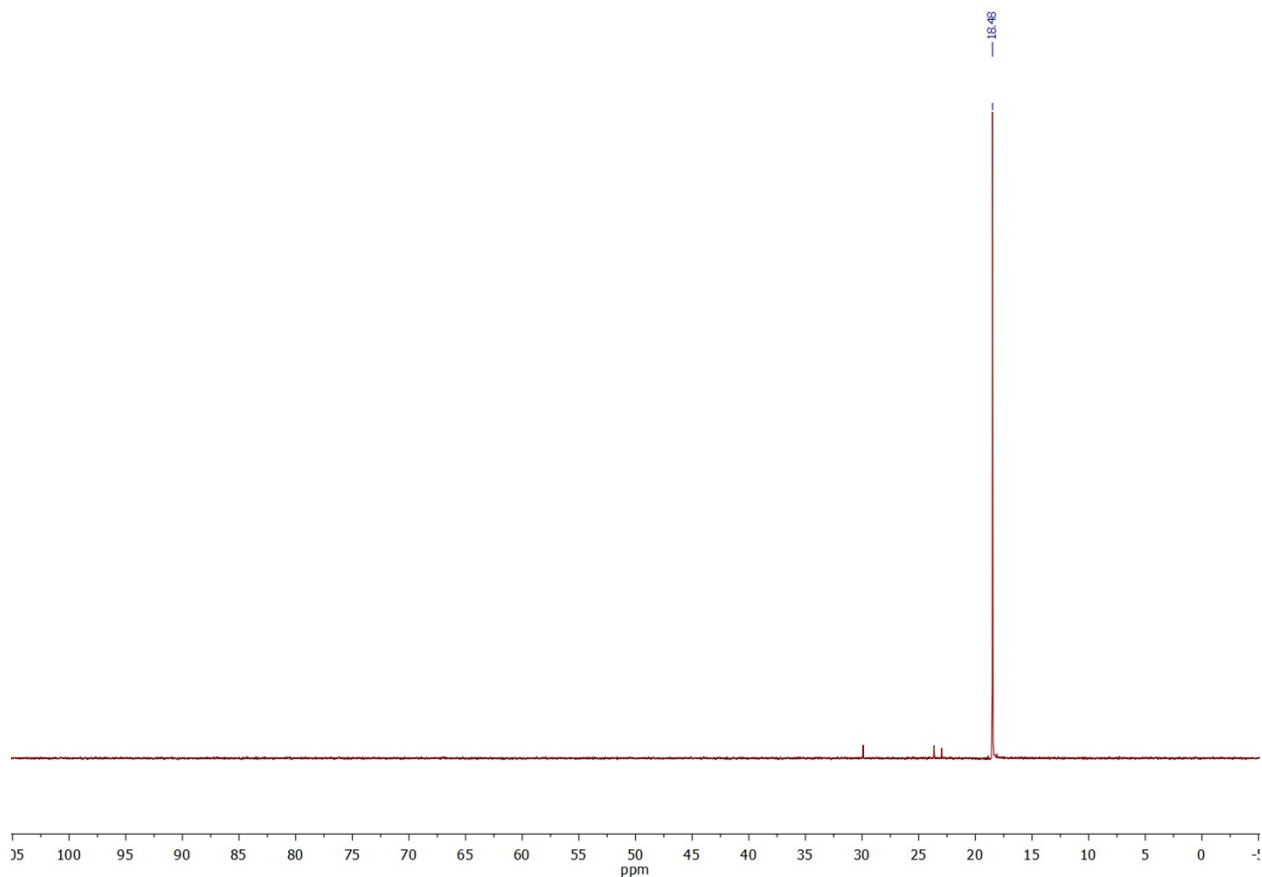

Figure S 81.  $^{31}\text{P}$ -NMR spectrum of **5g** ( $\text{CDCl}_3$ ).

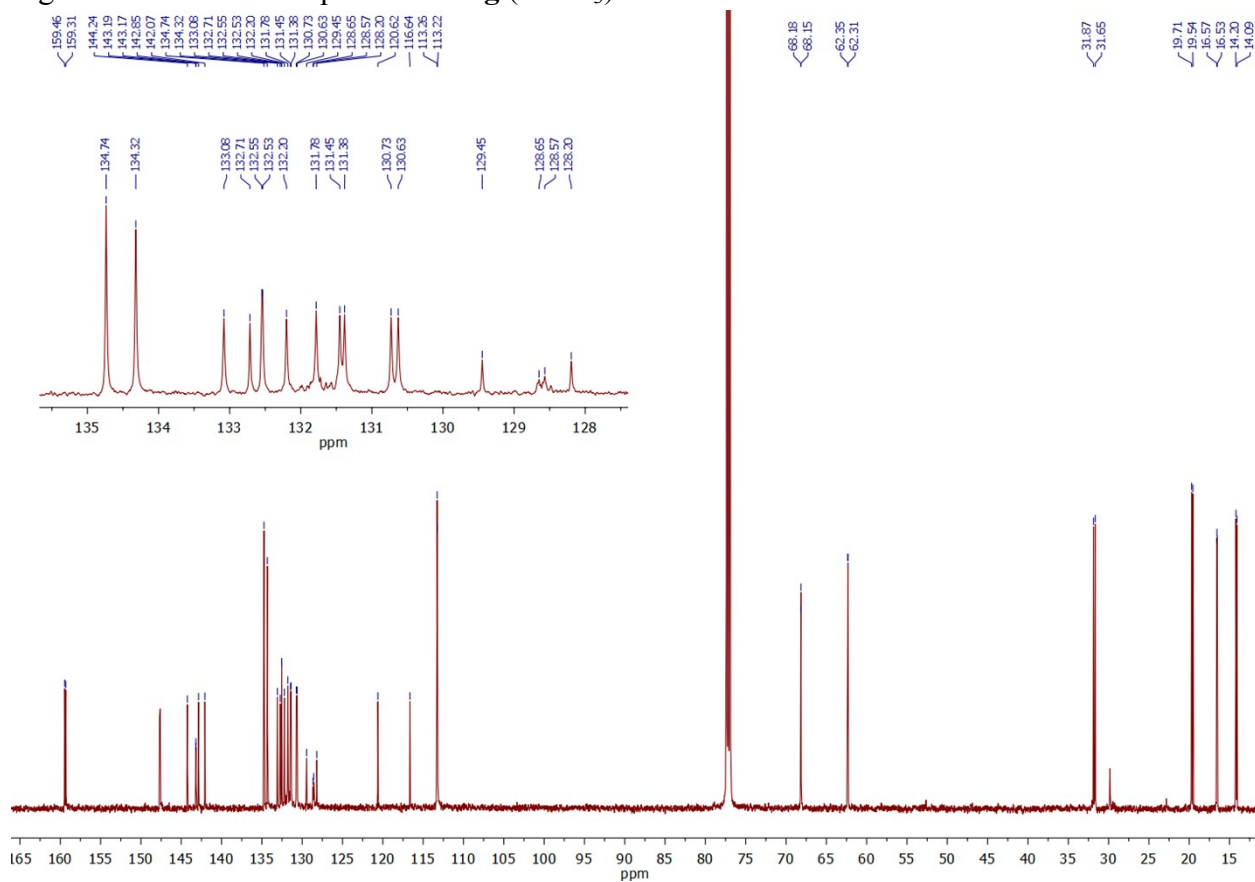

Figure S 82.  $^{13}\text{C}$ -NMR spectrum of **5g** ( $\text{CDCl}_3$ ).

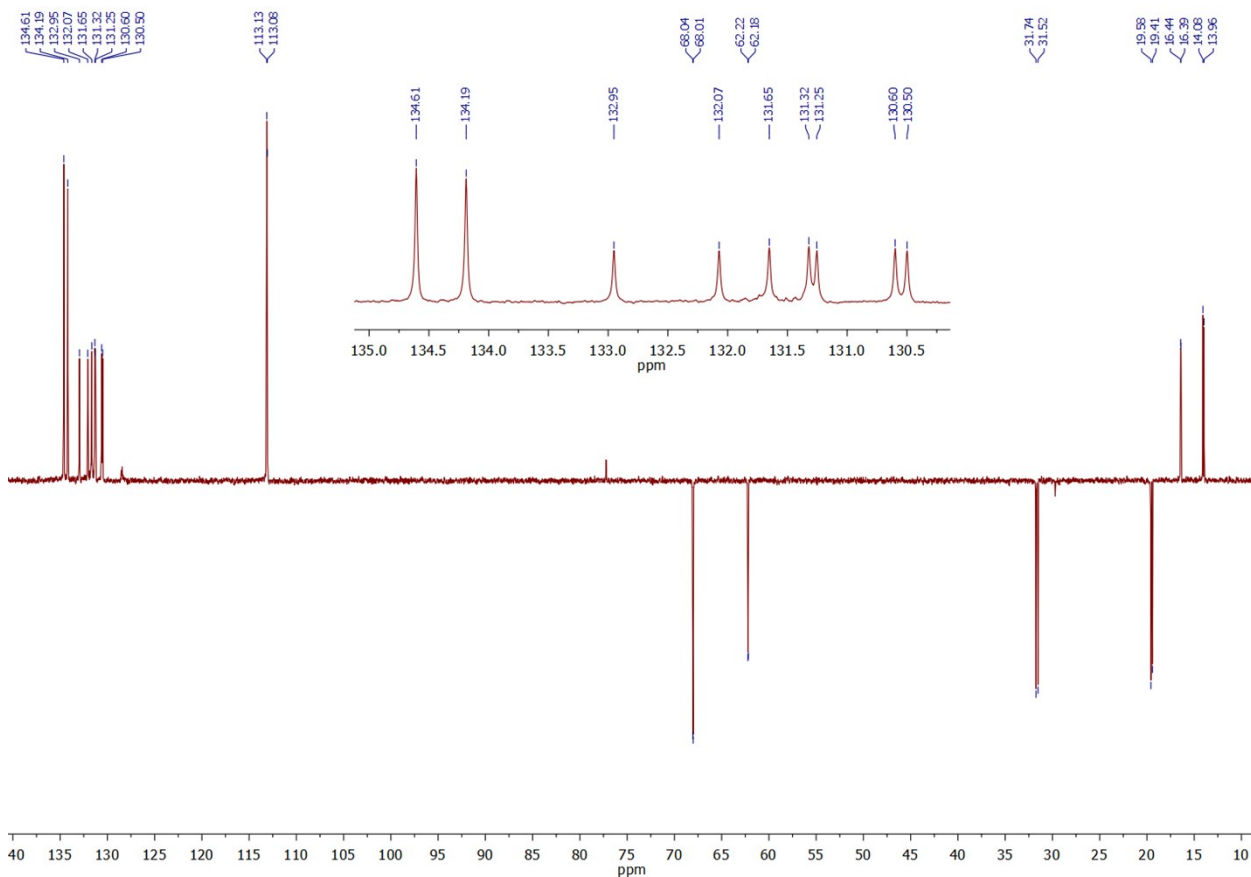

Figure S 83.  $^{13}\text{C}$  DEPT spectrum of **5g** ( $\text{CDCl}_3$ ).

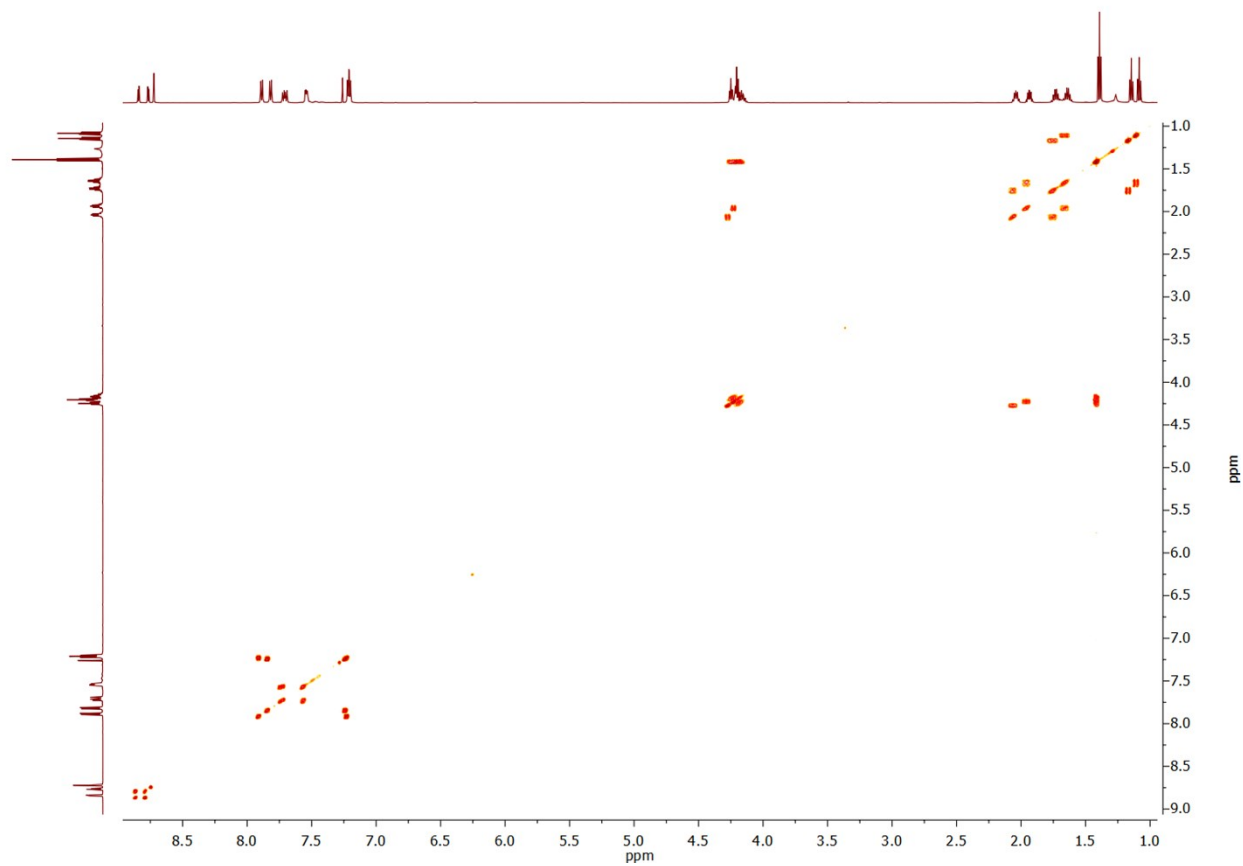

Figure S 84. COSY spectrum of **5g** ( $\text{CDCl}_3$ ).

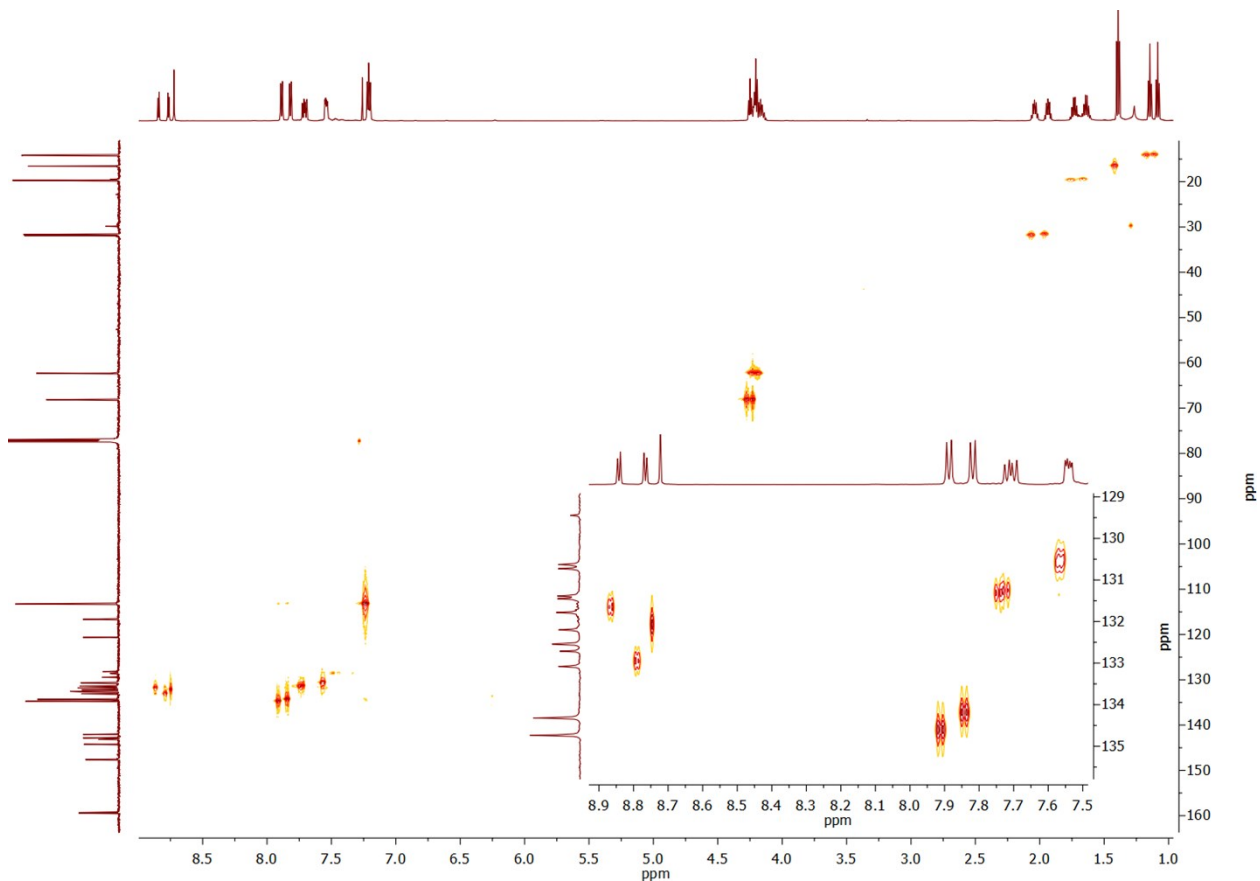

Figure S 85.  $^1\text{H}$ - $^{13}\text{C}$  HSQC spectrum of **5g** ( $\text{CDCl}_3$ ).

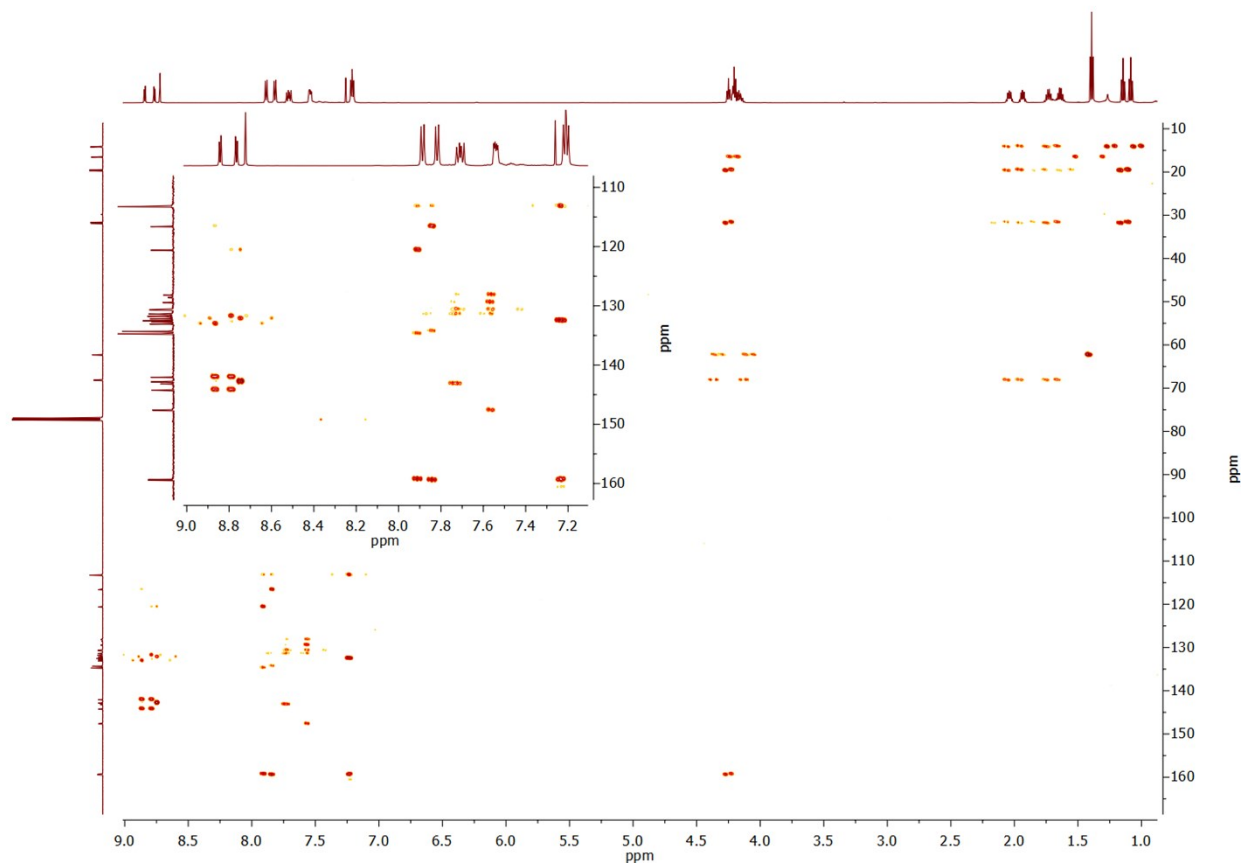

Figure S 86.  $^1\text{H}$ - $^{13}\text{C}$  HMBC spectrum of **5g** ( $\text{CDCl}_3$ ).

## Spectral data of 5h

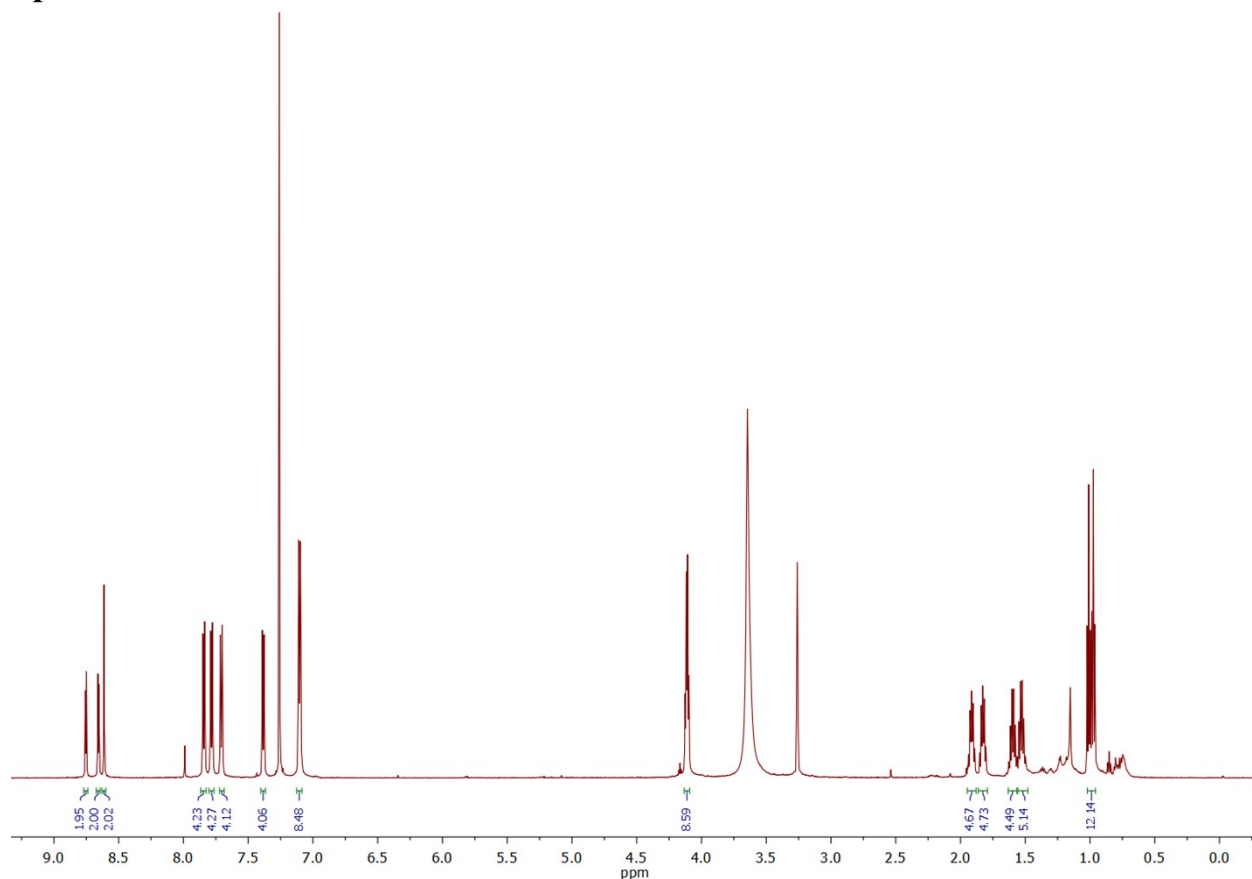

Figure S 87. <sup>1</sup>H-NMR spectrum of **5h** (20% MeOD in CDCl<sub>3</sub>).

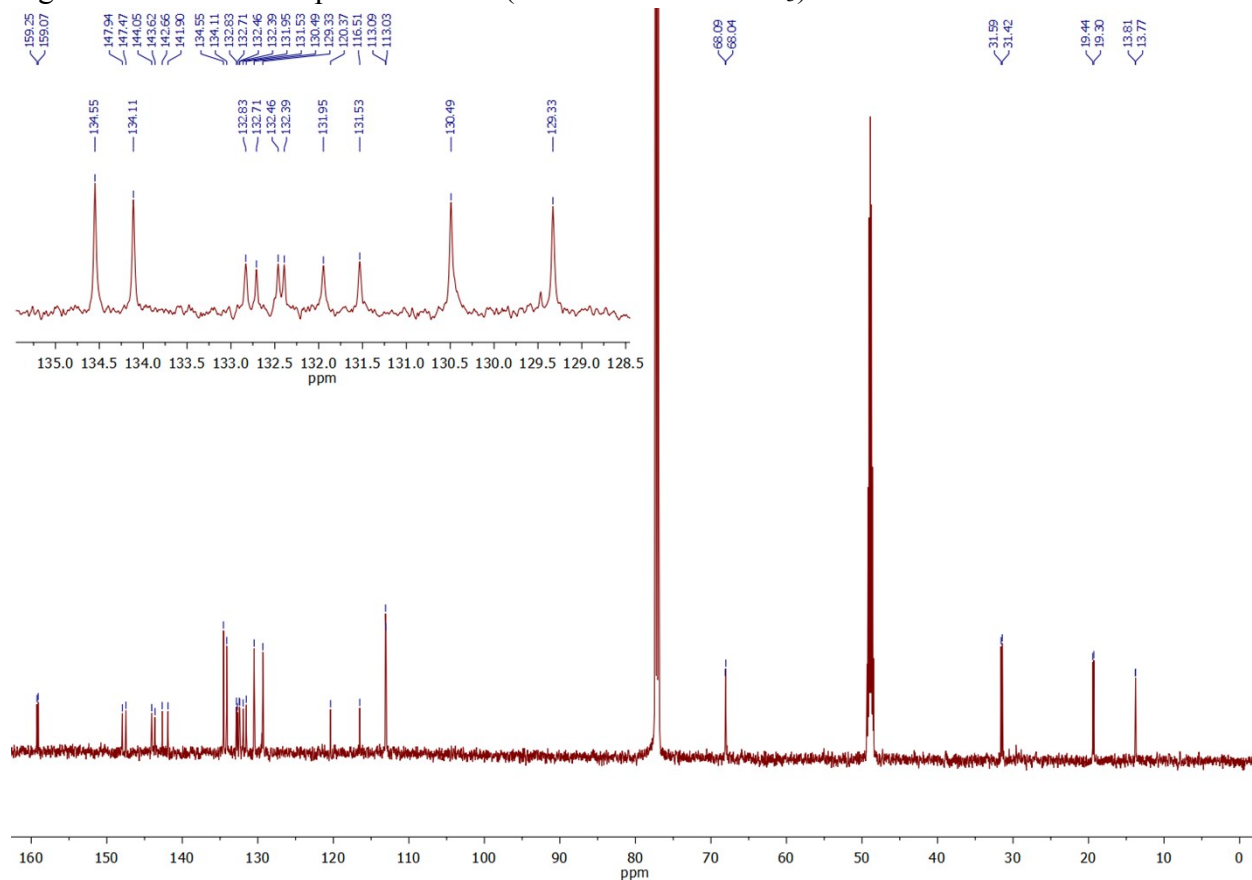

Figure S 88. <sup>13</sup>C-NMR spectrum of **5h** (20% MeOD in CDCl<sub>3</sub>).

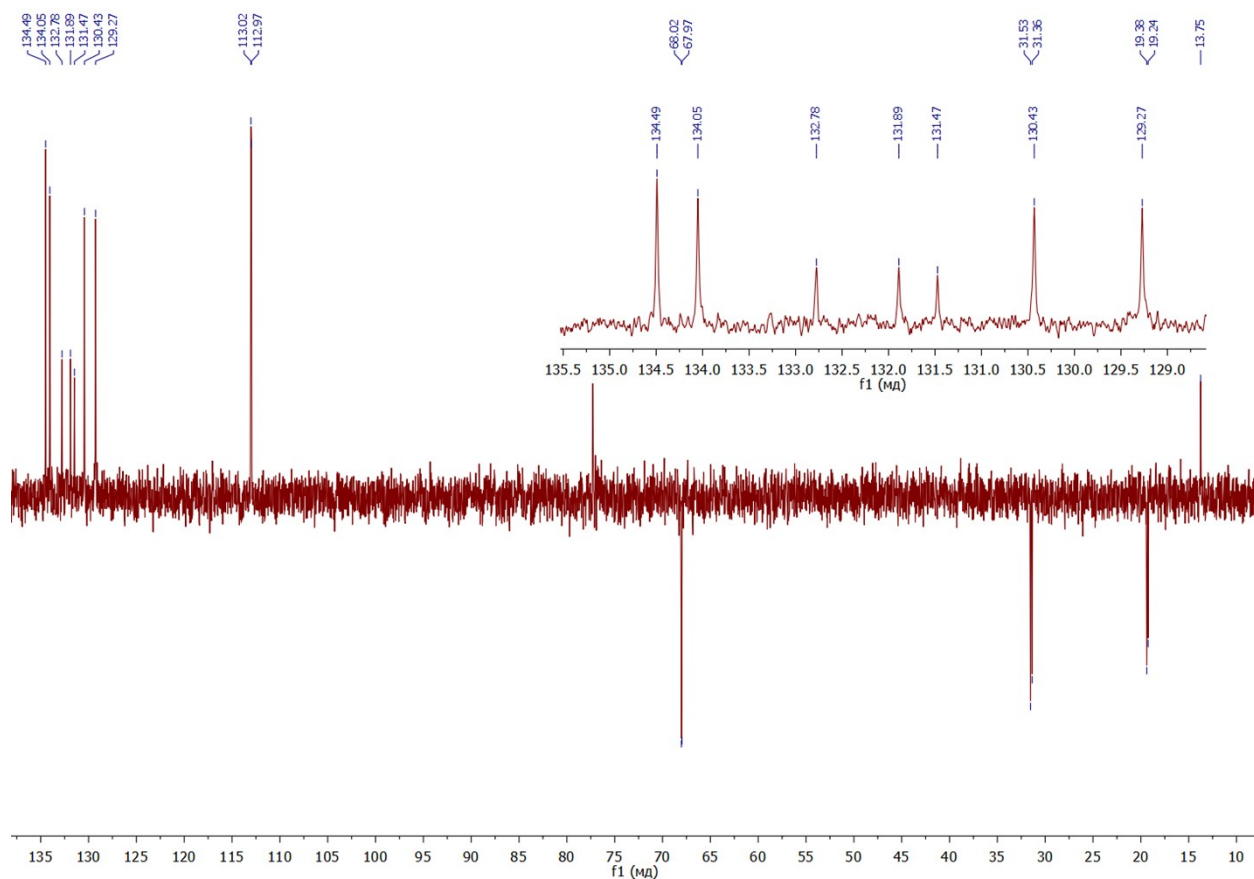

Figure S 89.  $^{13}\text{C}$  DEPT-135 spectrum of **5h** (20% MeOD in  $\text{CDCl}_3$ ).

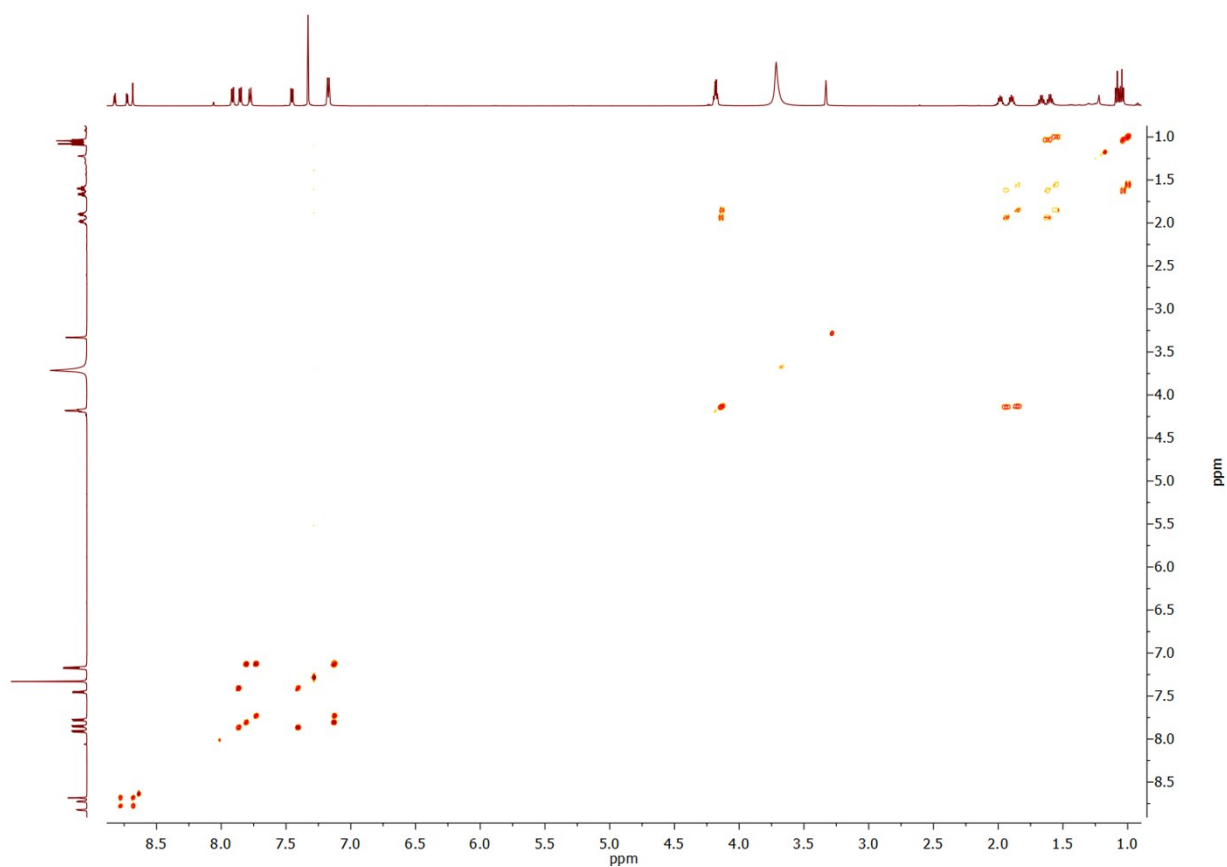

Figure S 90. COSY spectrum of **5h** (20% MeOD in  $\text{CDCl}_3$ ).

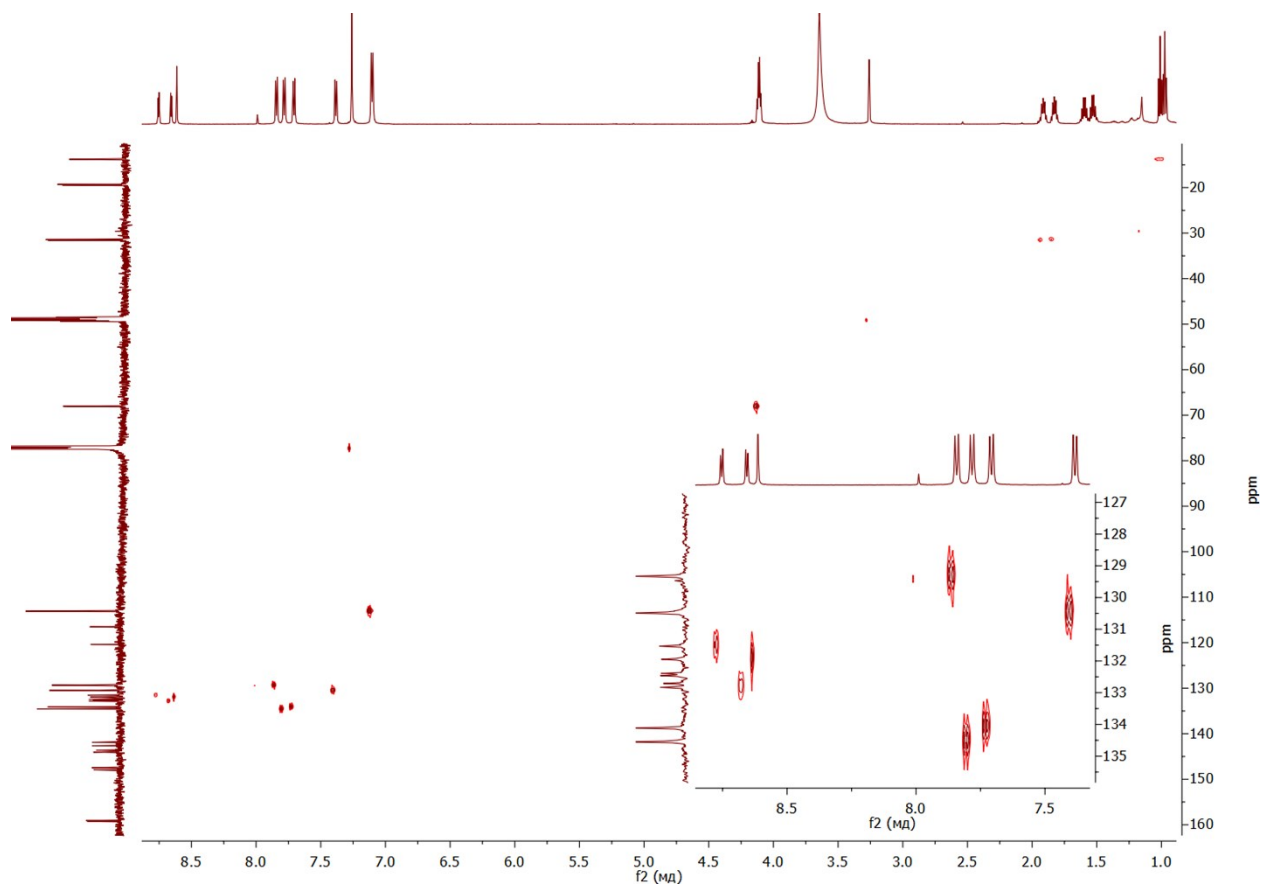

Figure S 91.  $^1\text{H}$ - $^{13}\text{C}$  HSQC spectrum of **5h** (20% MeOD in  $\text{CDCl}_3$ ).

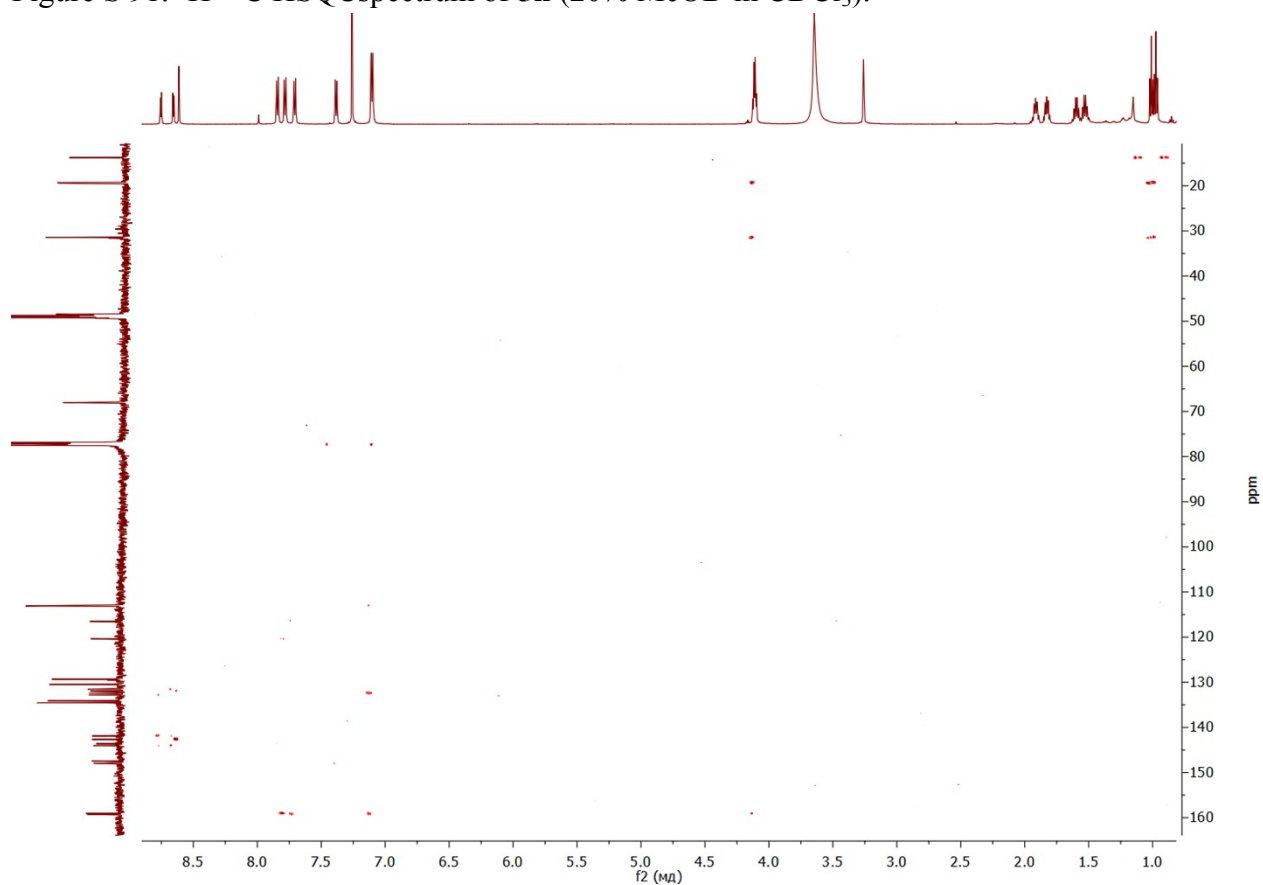

Figure S 92.  $^1\text{H}$ - $^{13}\text{C}$  HMBC spectrum of **5h** (20% MeOD in  $\text{CDCl}_3$ ).

## Spectral data of 6

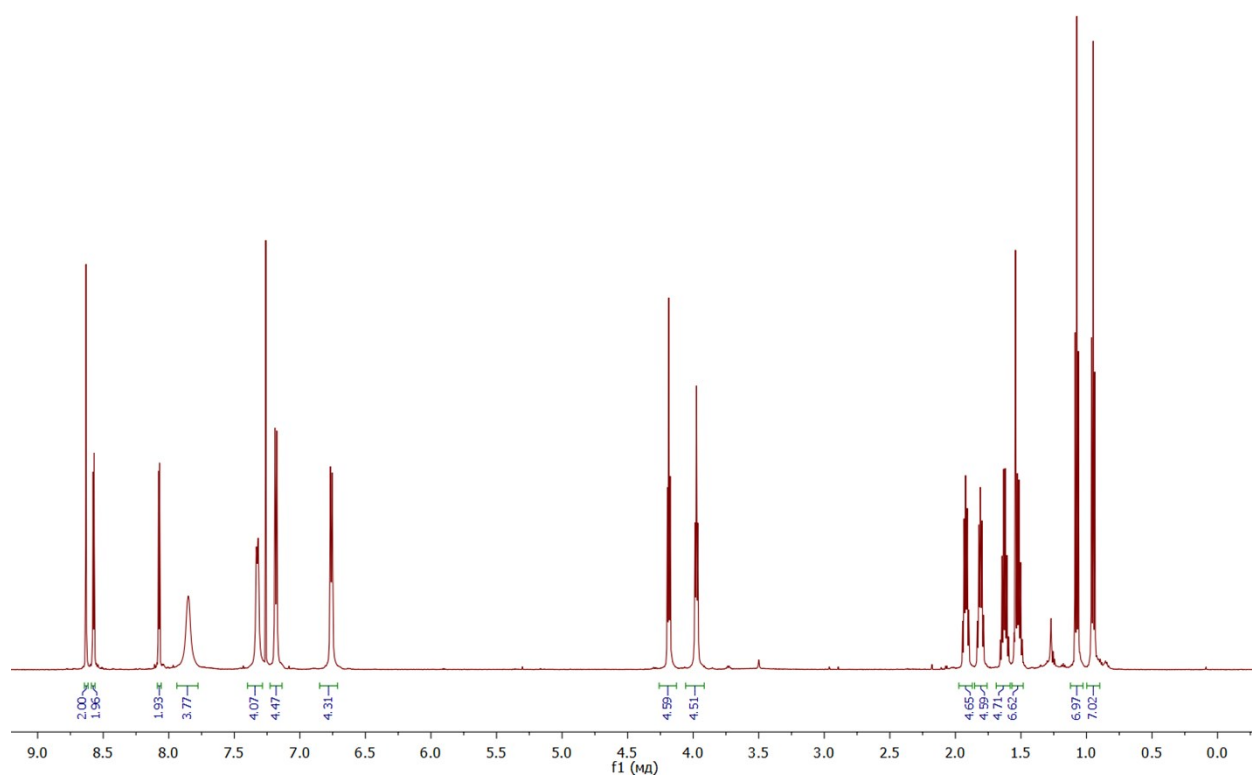

Figure S 93.  $^1\text{H-NMR}$  spectrum of **6** ( $\text{CDCl}_3$ ).

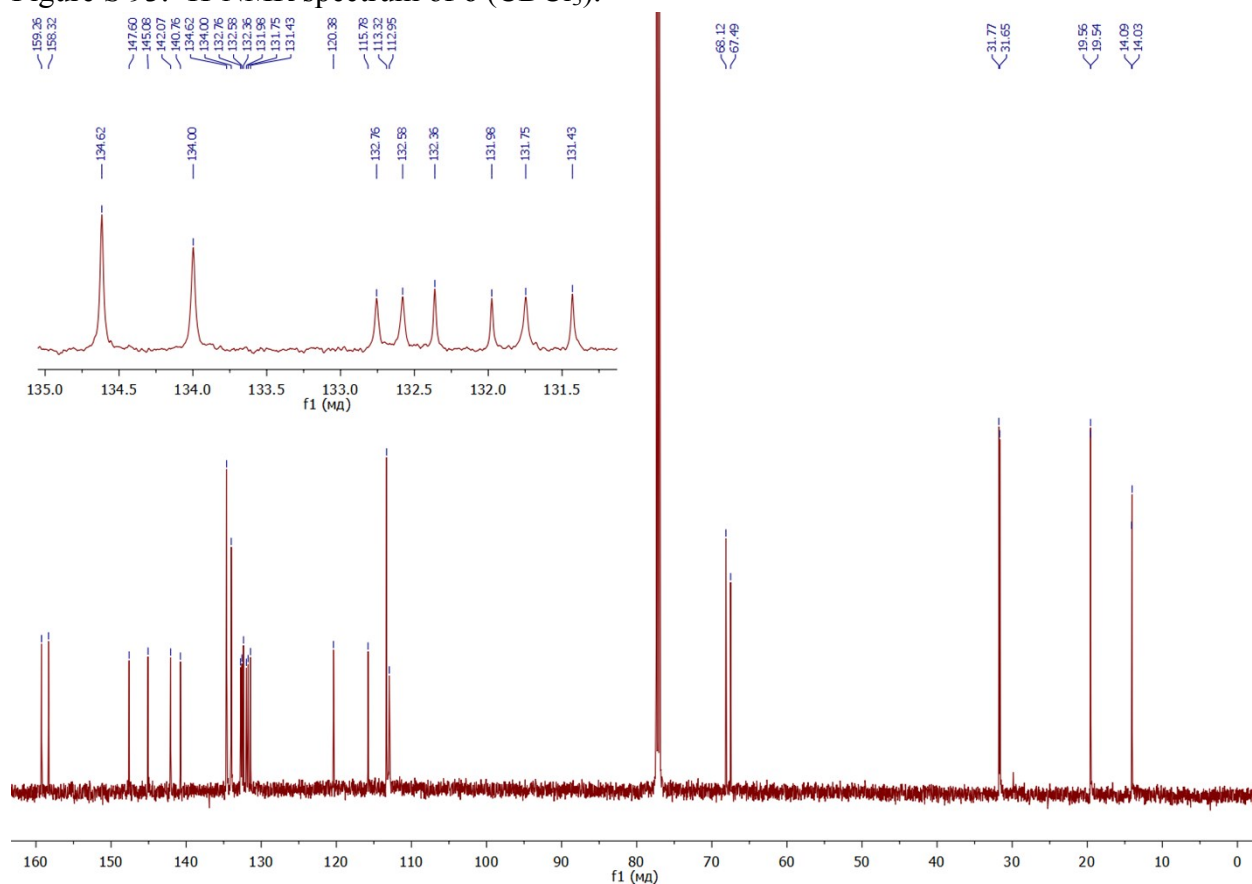

Figure S 94.  $^{13}\text{C-NMR}$  spectrum of **6** ( $\text{CDCl}_3$ ).



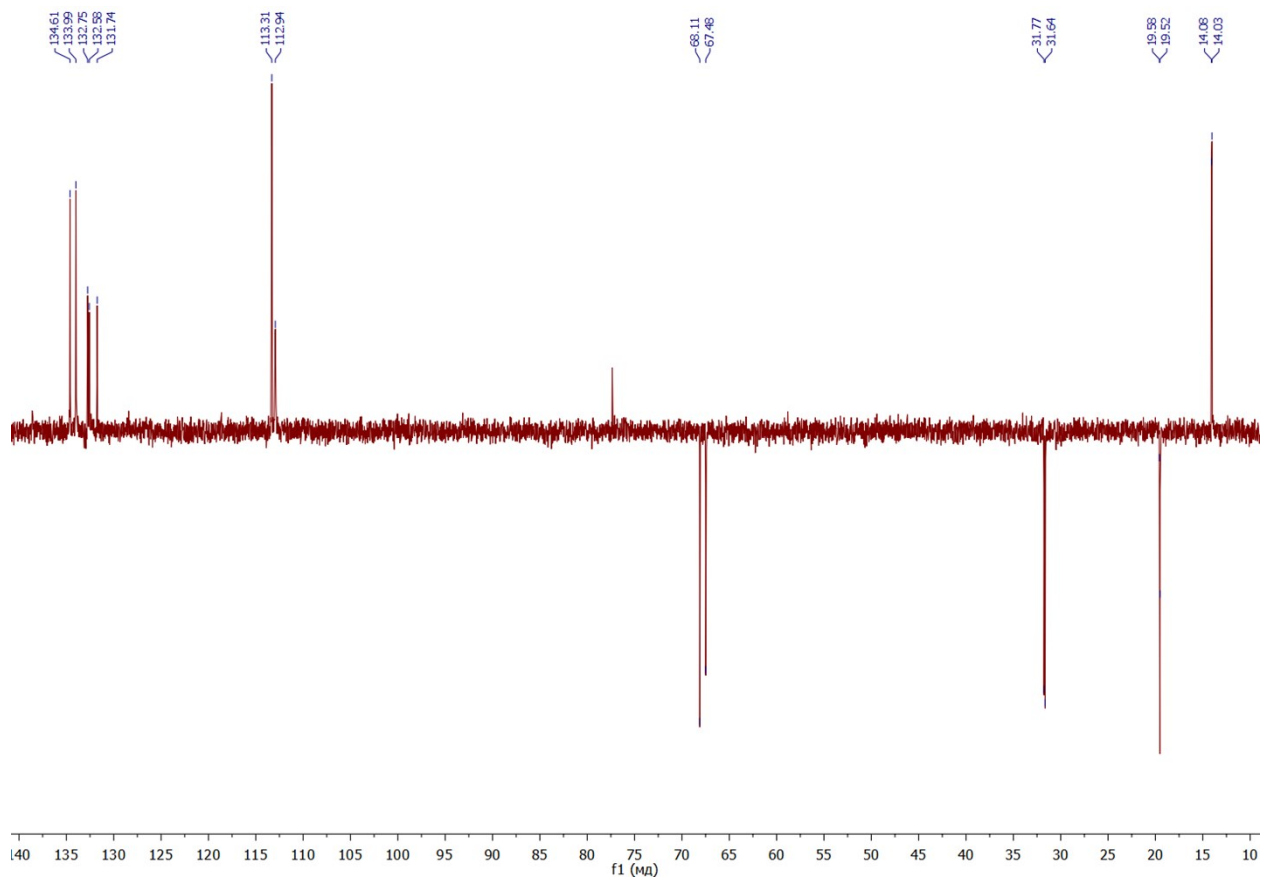

Figure S 95.  $^{13}\text{C}$  DEPT-135 spectrum of **6** ( $\text{CDCl}_3$ ).

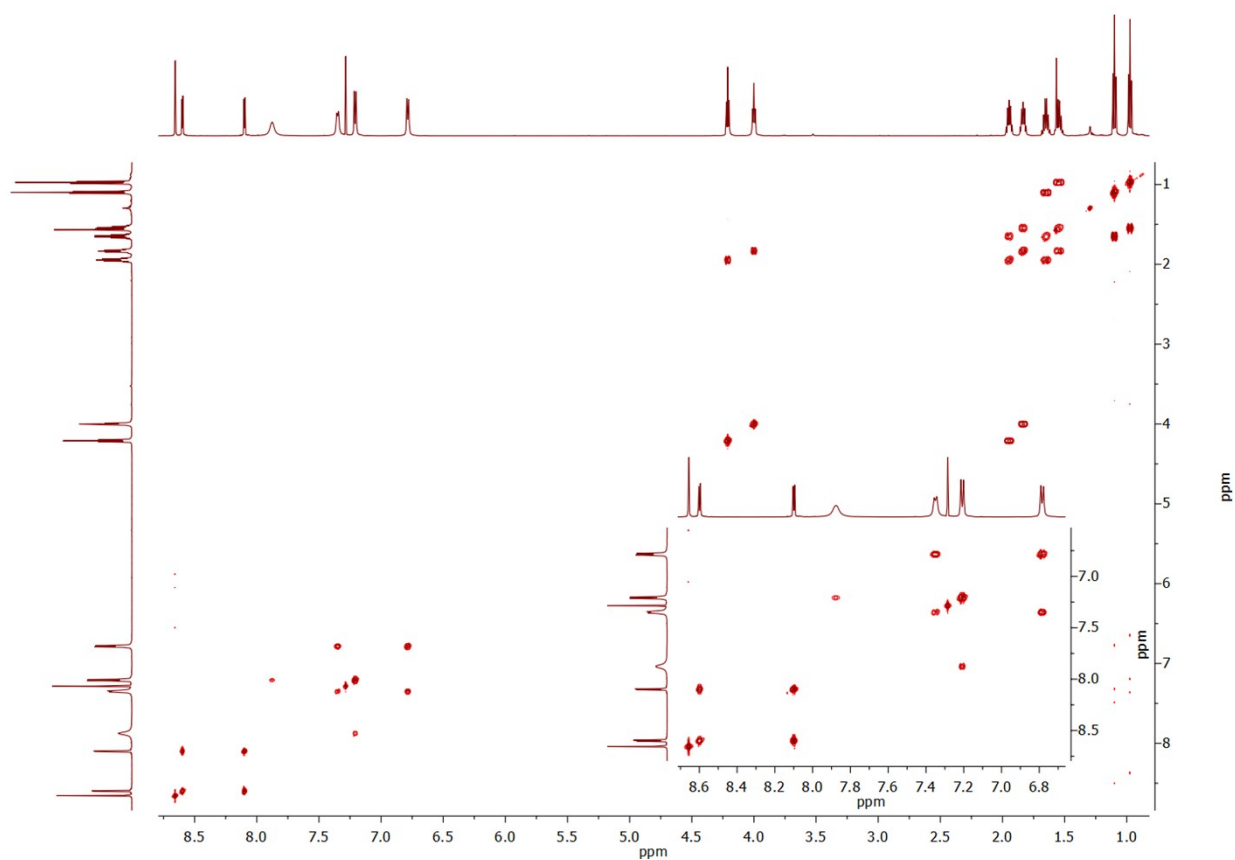

Figure S 96. COSY spectrum of **6** ( $\text{CDCl}_3$ ).

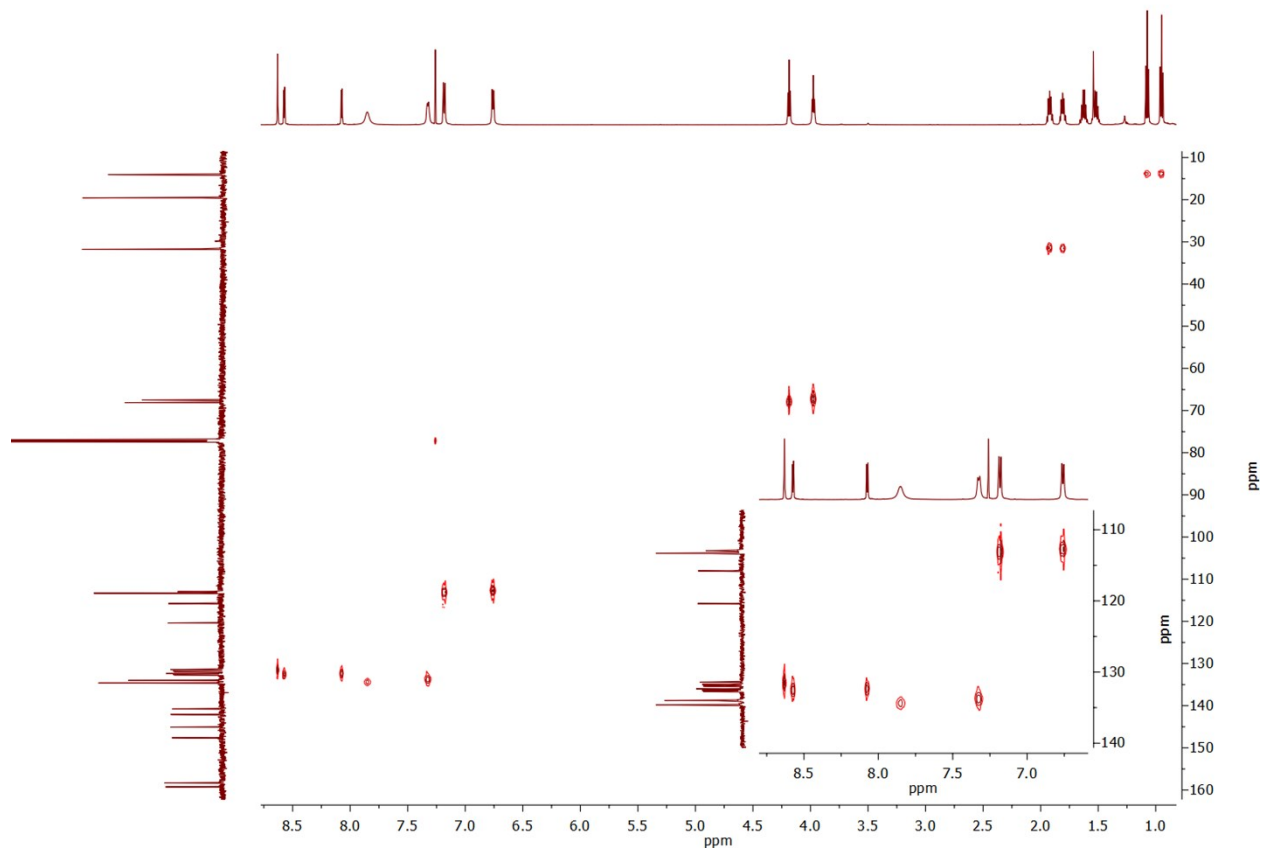

Figure S 97.  $^1\text{H}$ - $^{13}\text{C}$  HSQC spectrum of **6** ( $\text{CDCl}_3$ ).

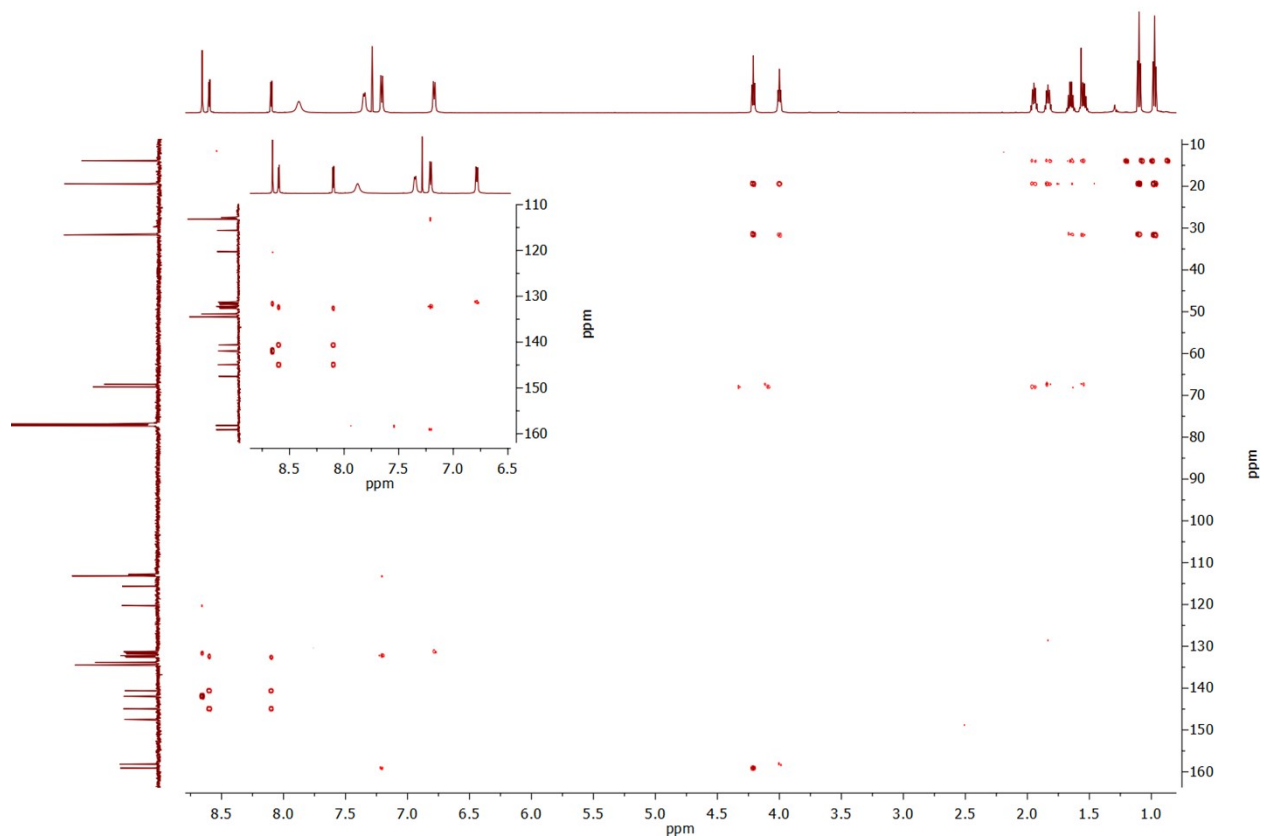

Figure S 98.  $^1\text{H}$ - $^{13}\text{C}$  HMBC spectrum of **6** ( $\text{CDCl}_3$ ).

# Spectral data of 8g

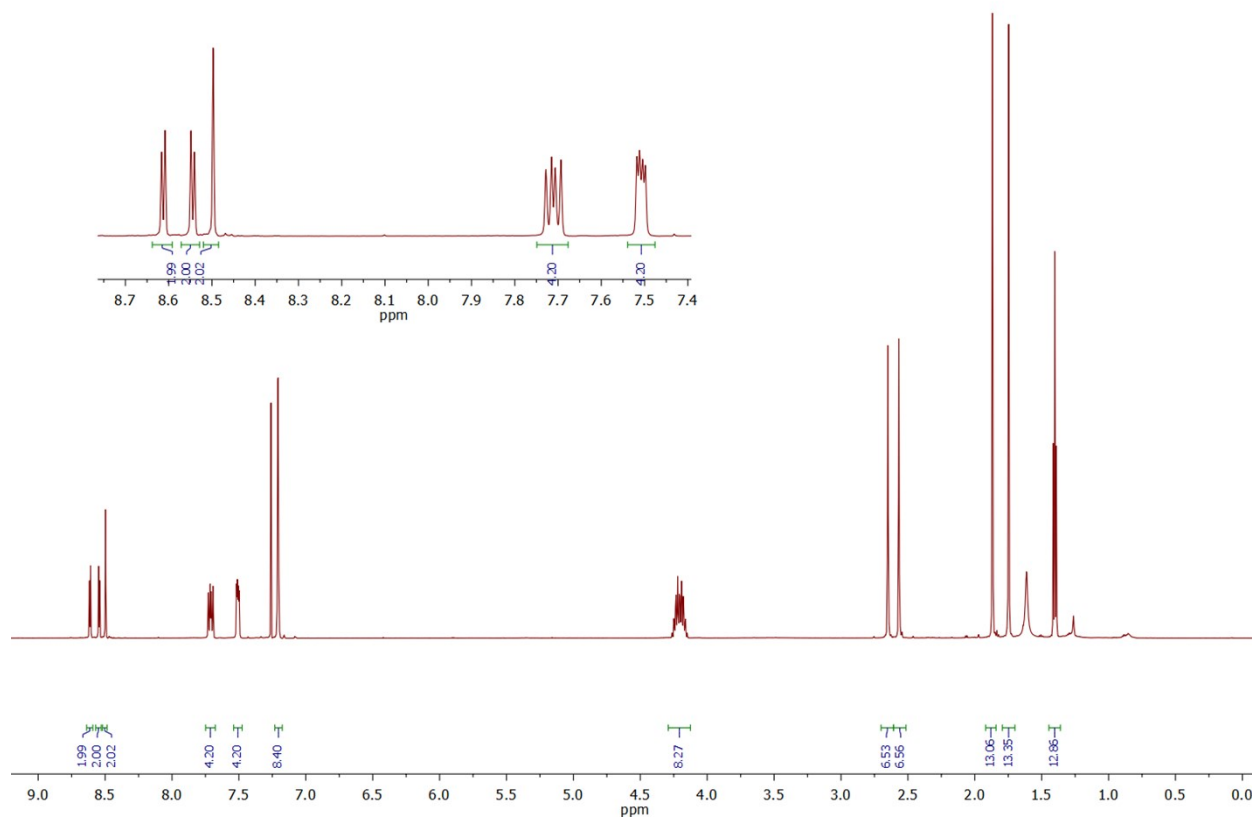

Figure S 99.  $^1\text{H-NMR}$  spectrum of **8g** ( $\text{CDCl}_3$ ).

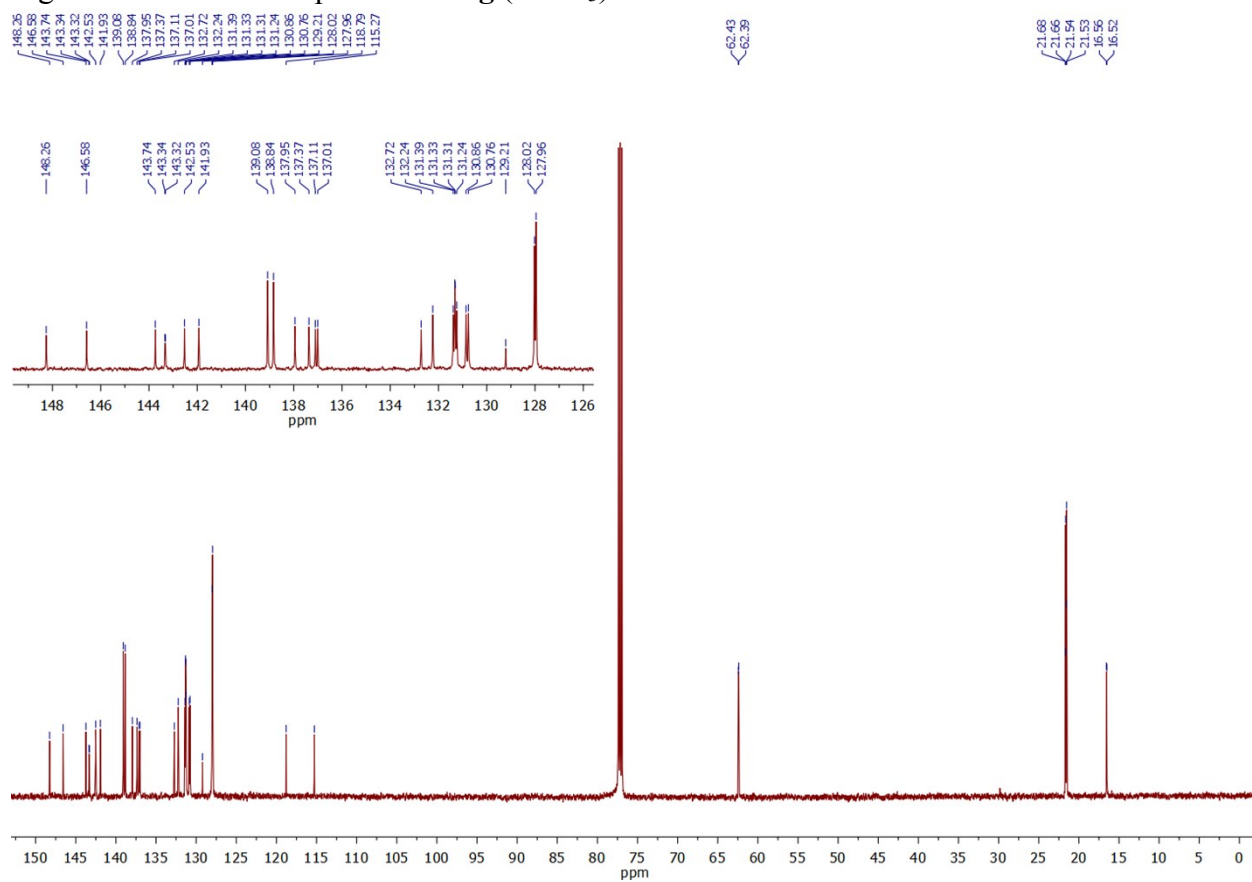

Figure S 100.  $^{13}\text{C-NMR}$  spectrum of **8g** ( $\text{CDCl}_3$ ).

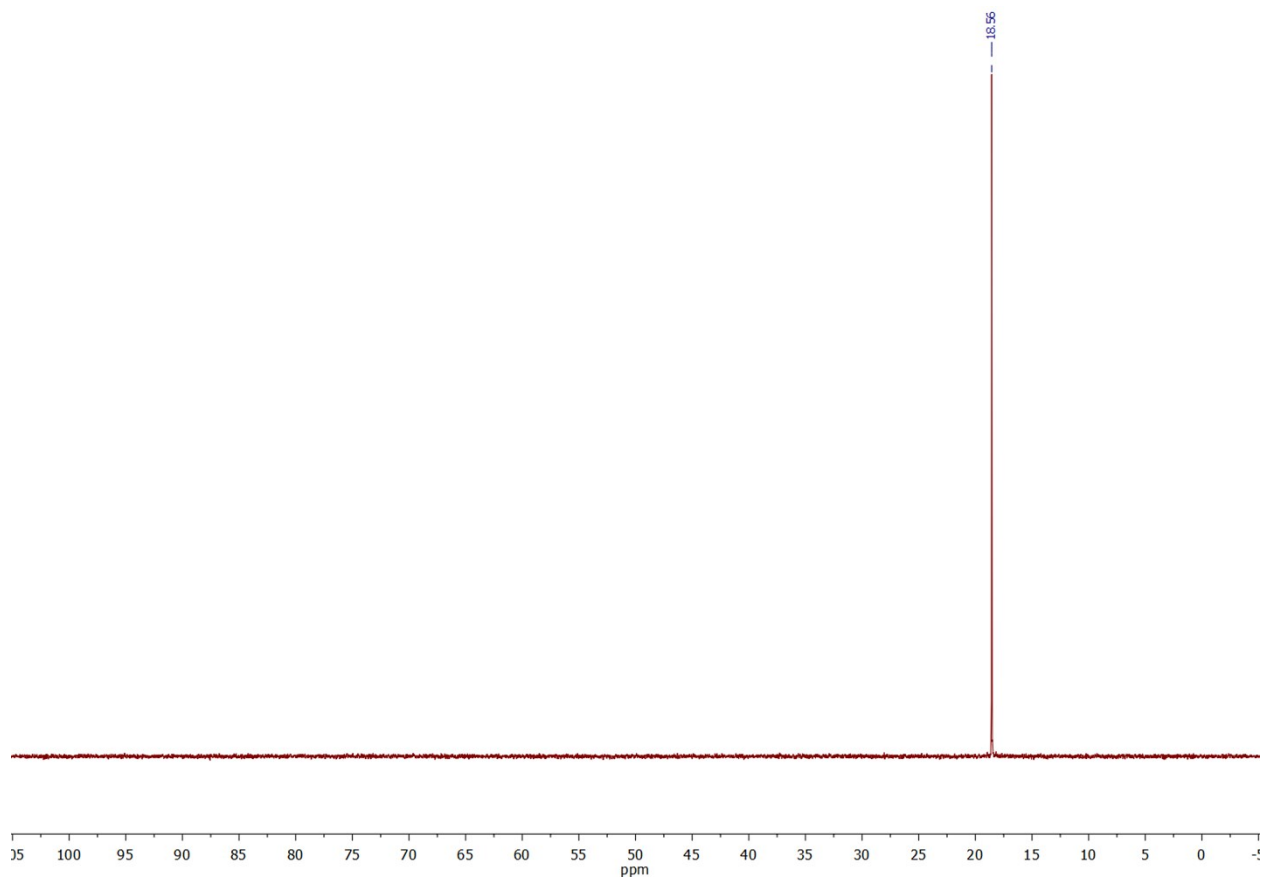

Figure S 101.  $^{31}\text{P}$ -NMR spectrum of **8g** ( $\text{CDCl}_3$ ).

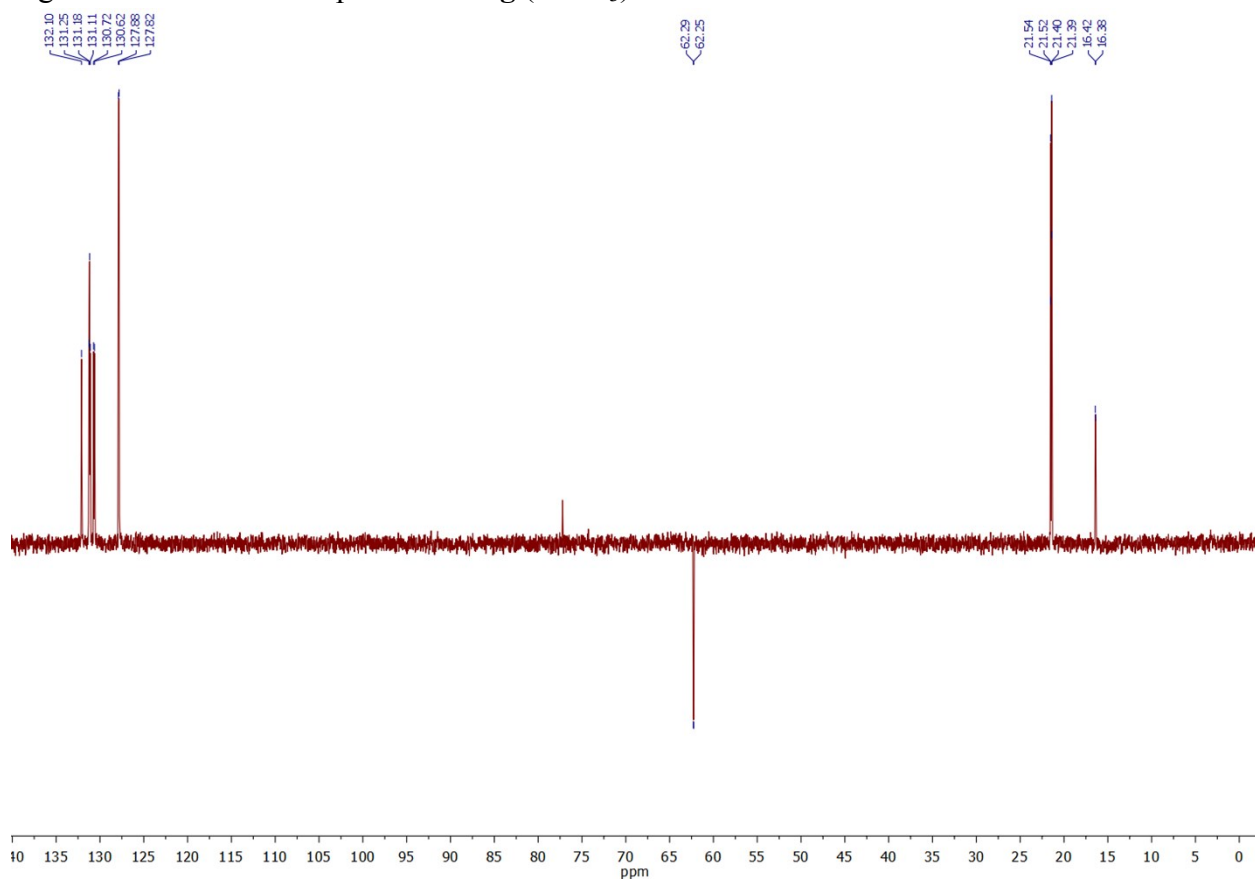

Figure S 102.  $^{13}\text{C}$  DEPT-135 spectrum of **8g** ( $\text{CDCl}_3$ ).

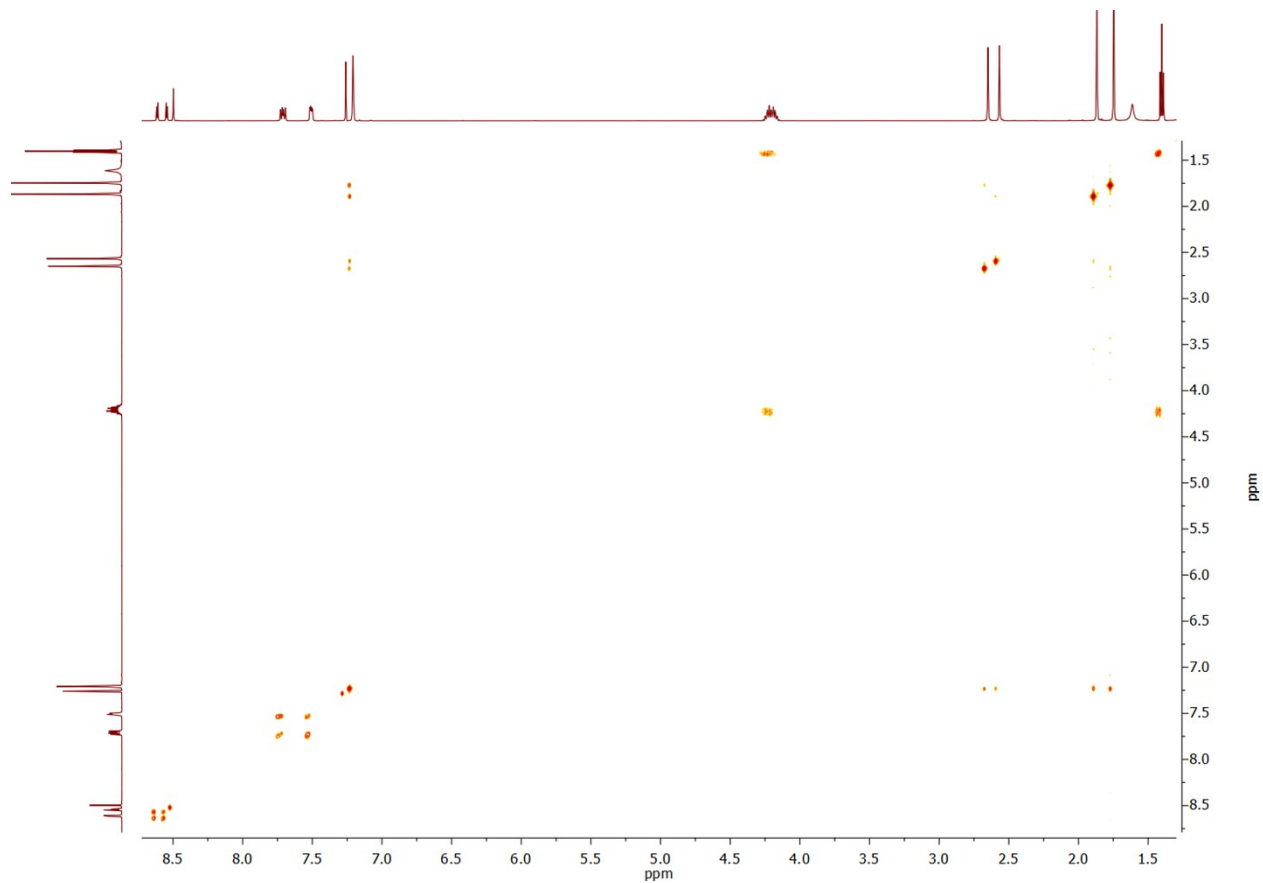

Figure S 103. COSY spectrum of **8g** (CDCl<sub>3</sub>).

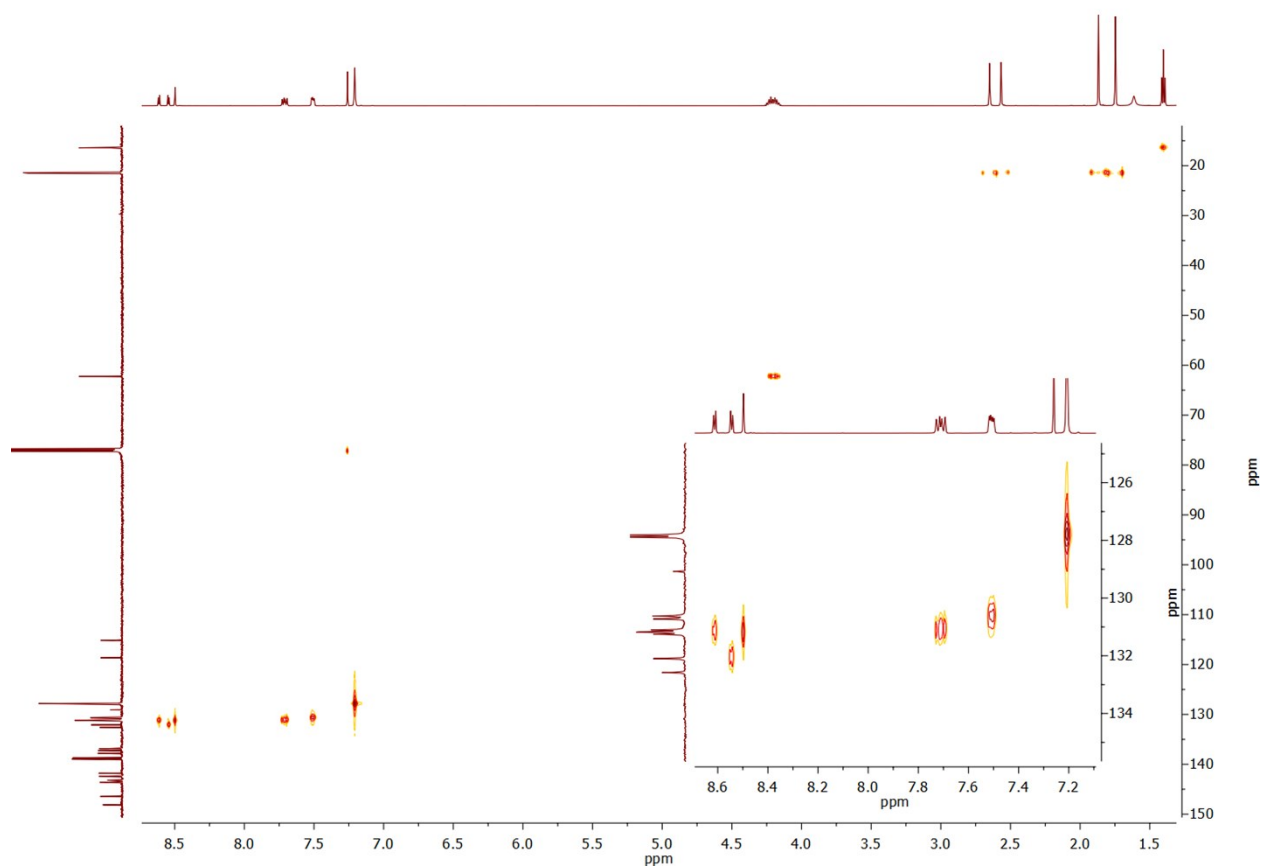

Figure S 104. <sup>1</sup>H-<sup>13</sup>C HSQC spectrum of **8g** (CDCl<sub>3</sub>).

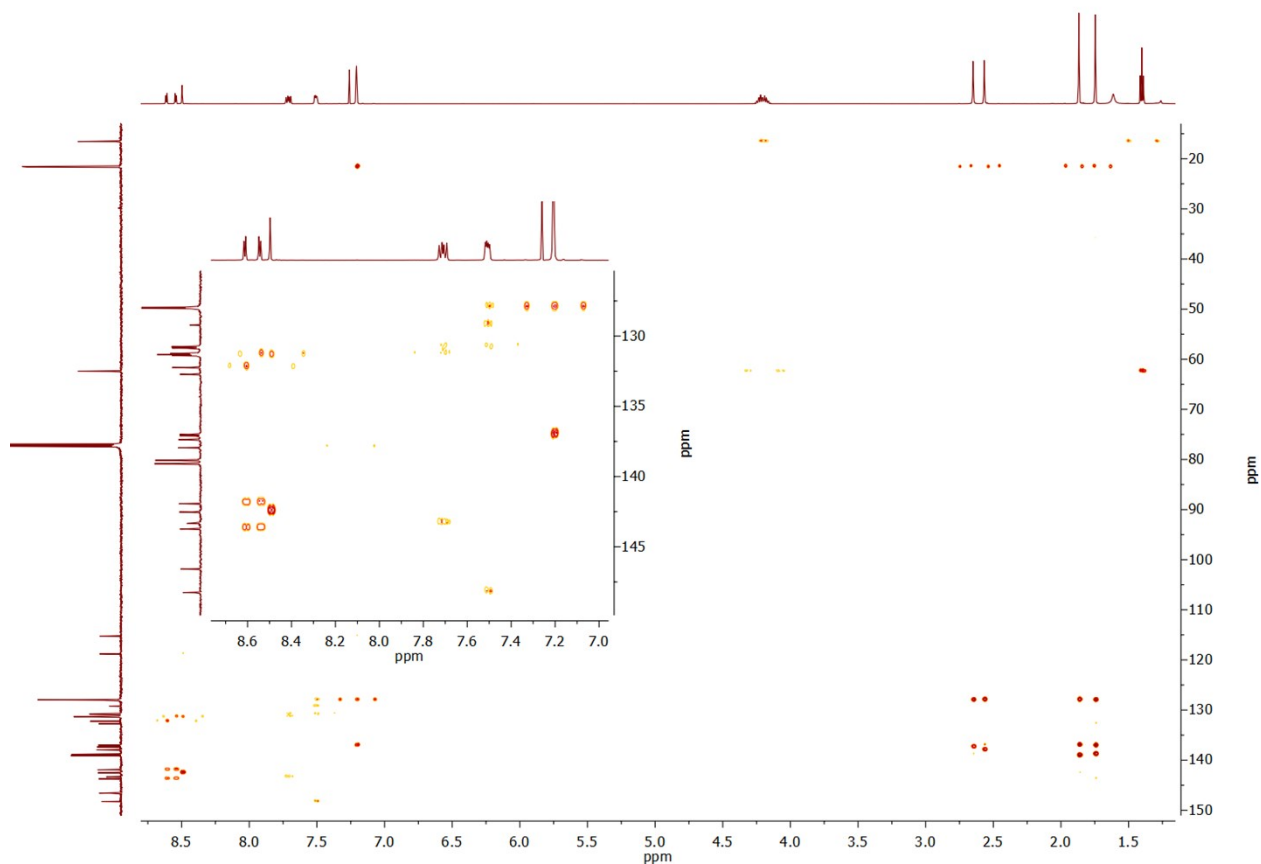

Figure S 105.  $^1\text{H}$ - $^{13}\text{C}$  HMBC spectrum of **8g** ( $\text{CDCl}_3$ ).

### Spectral data of **9**

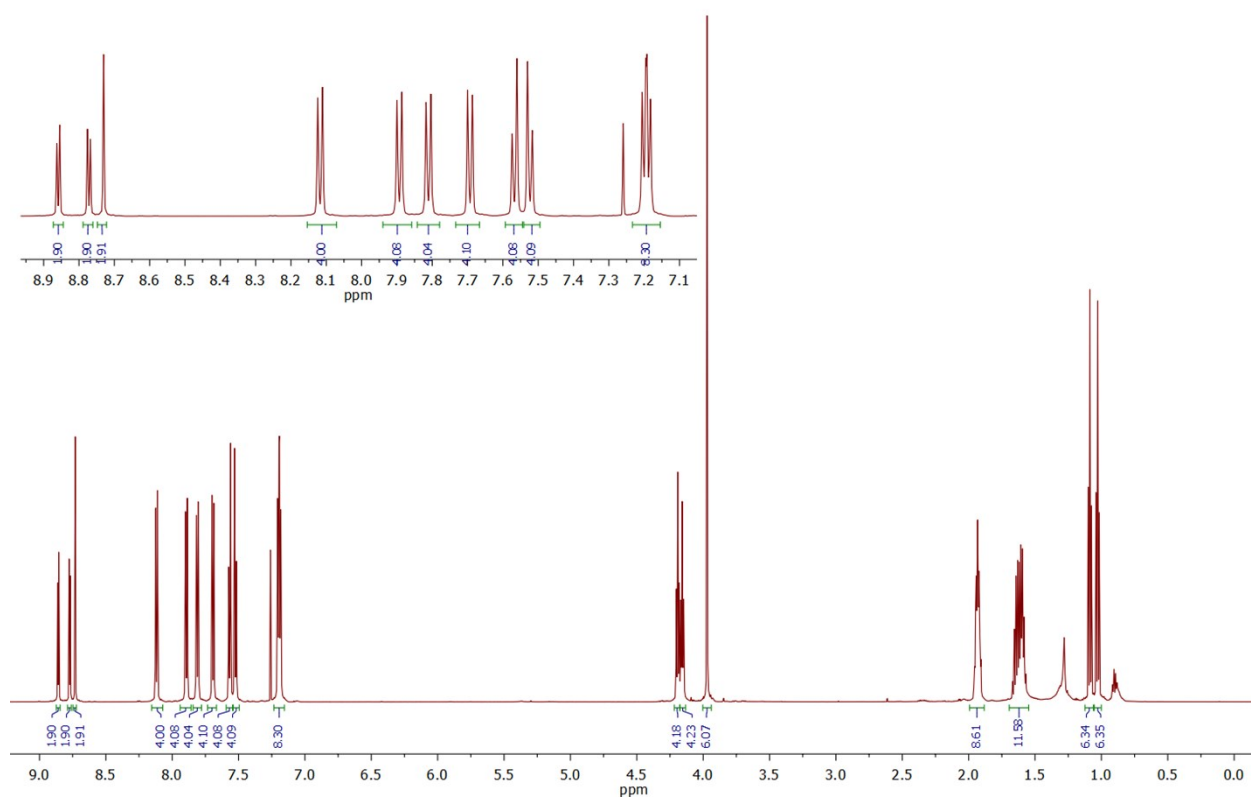

Figure S 106.  $^1\text{H}$ -NMR spectrum of **9** ( $\text{CDCl}_3$ ).

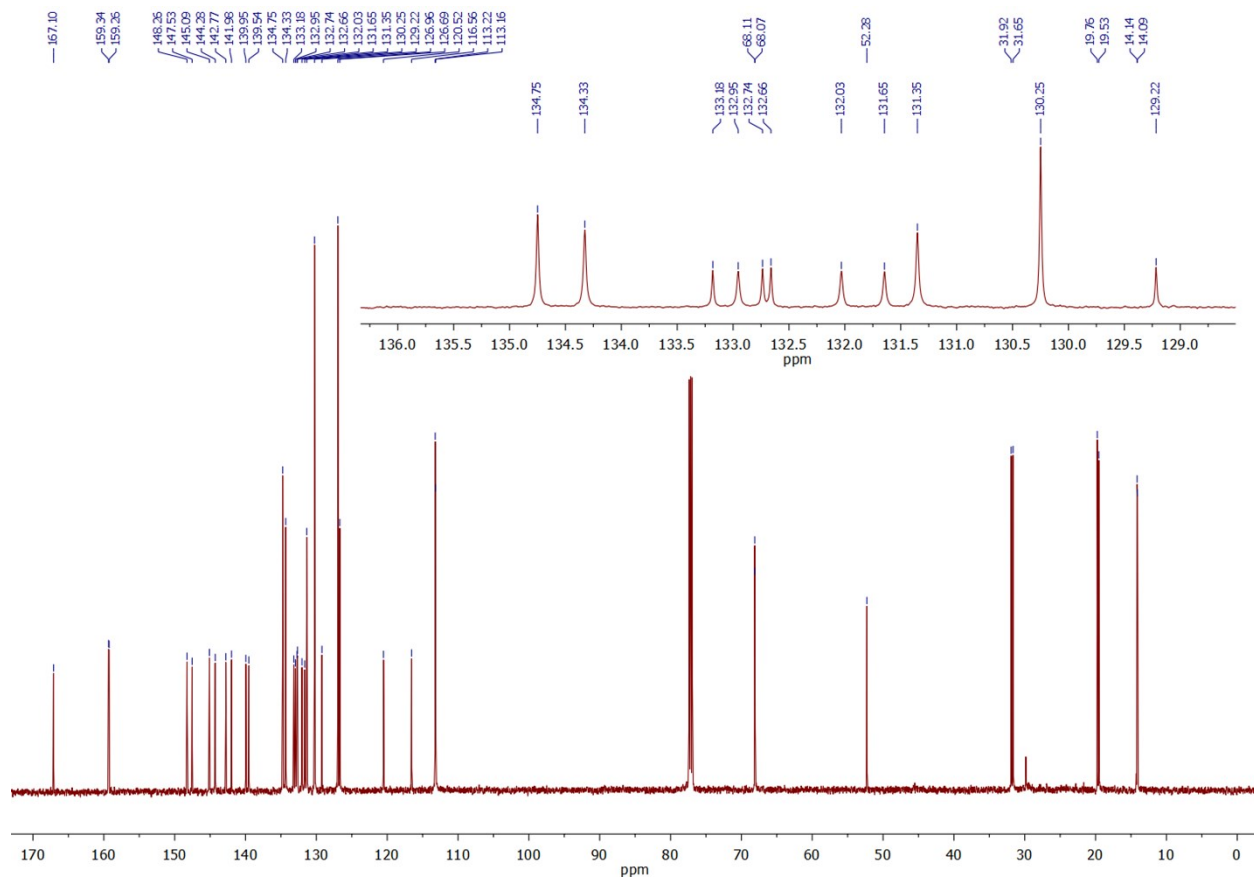

Figure S 107.  $^{13}\text{C}$ -NMR spectrum of **9** ( $\text{CDCl}_3$ ).

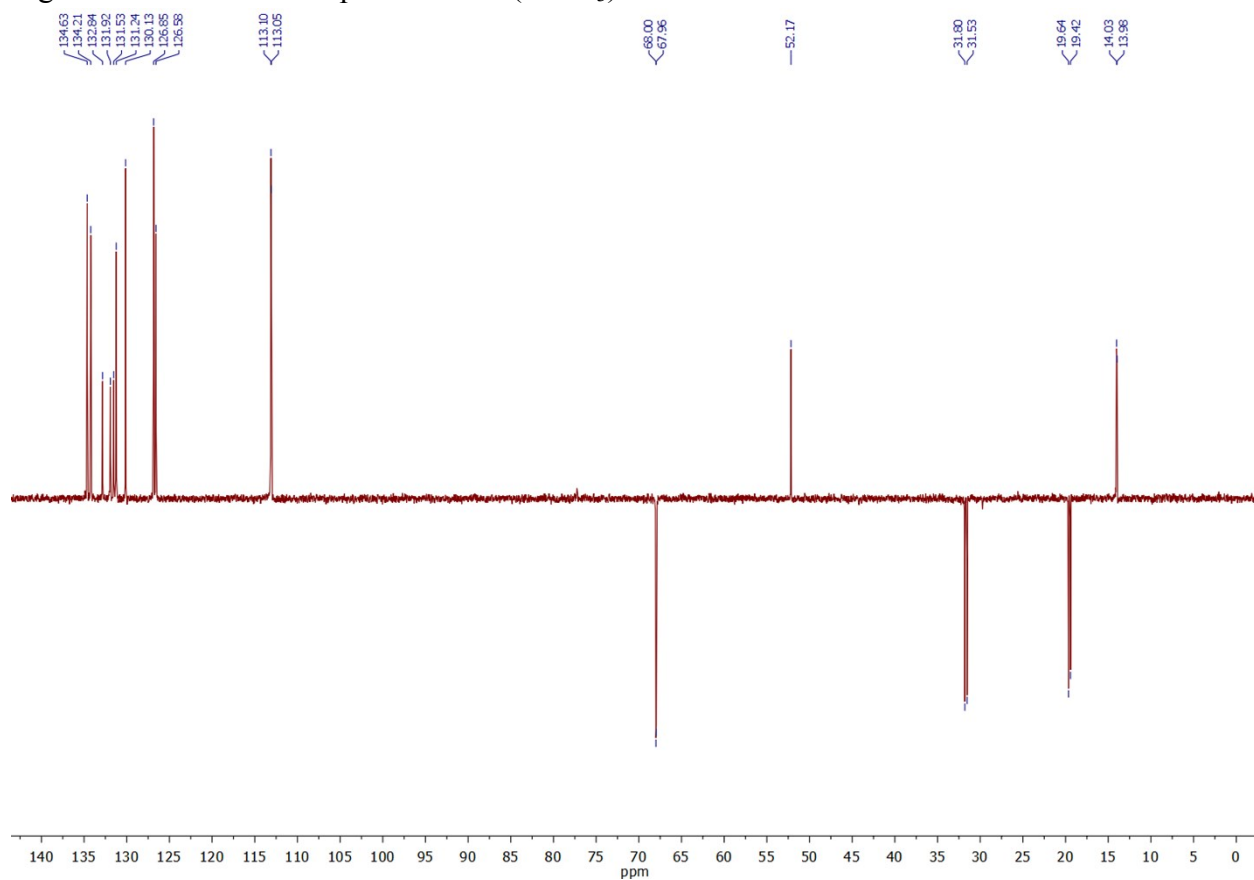

Figure S 108.  $^{13}\text{C}$  DEPT-135 spectrum of **9** ( $\text{CDCl}_3$ ).

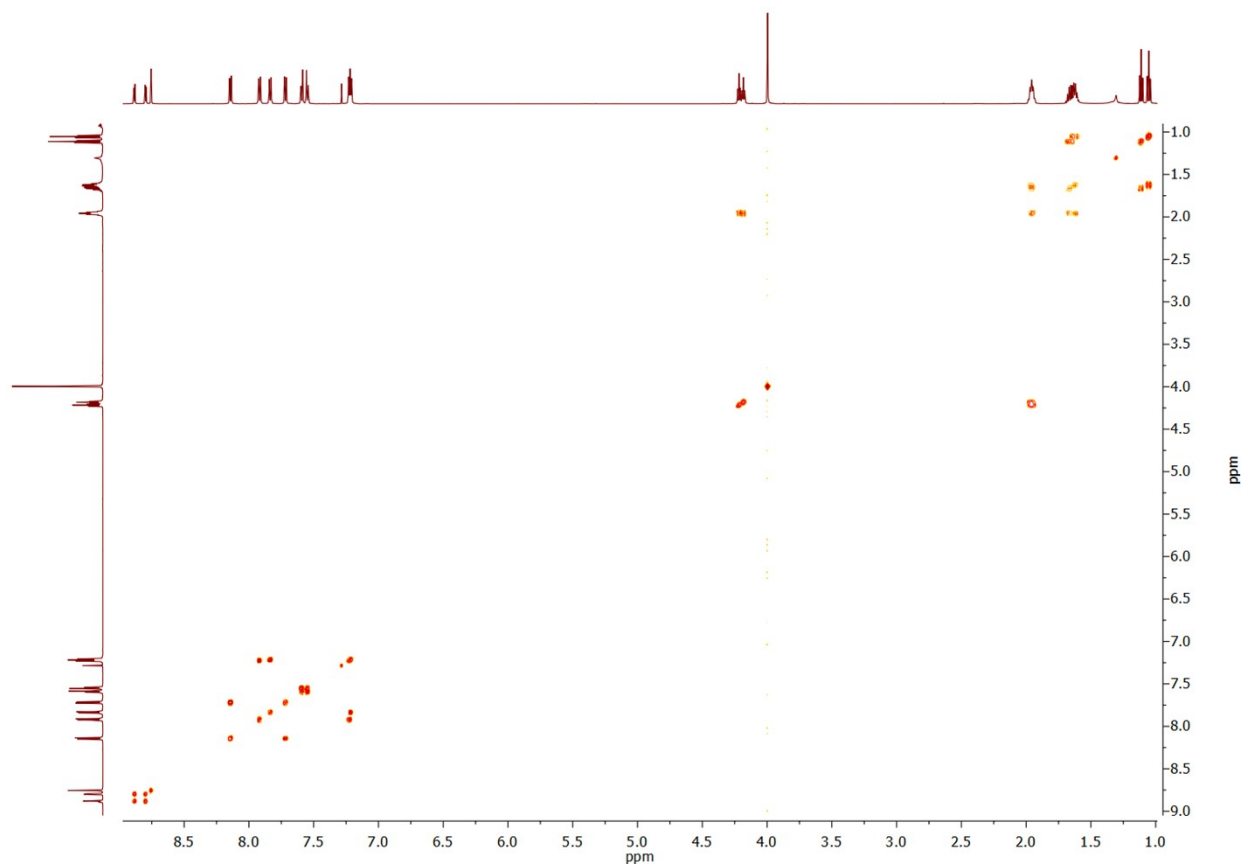

Figure S 109. COSY spectrum of **9** (CDCl<sub>3</sub>).

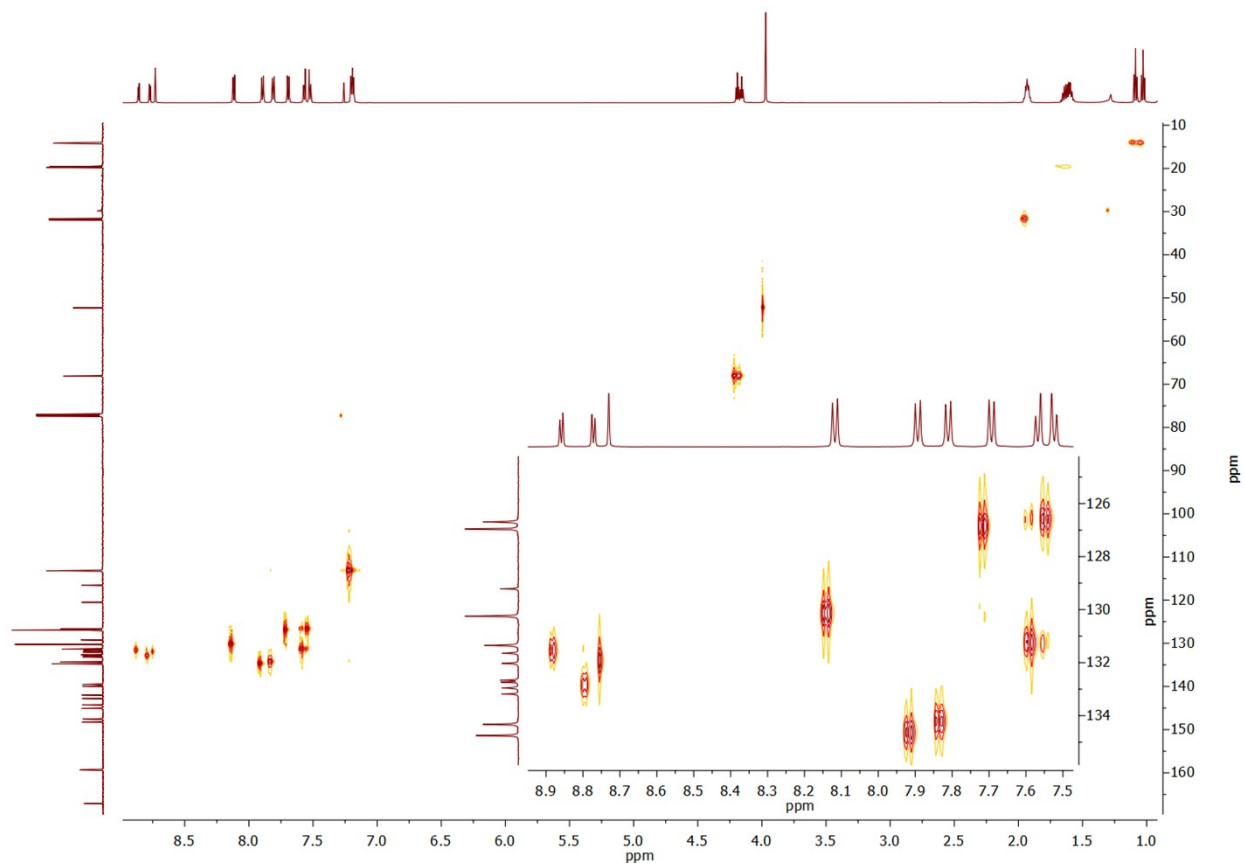

Figure S 110. <sup>1</sup>H-<sup>13</sup>C HSQC spectrum of **9** (CDCl<sub>3</sub>).



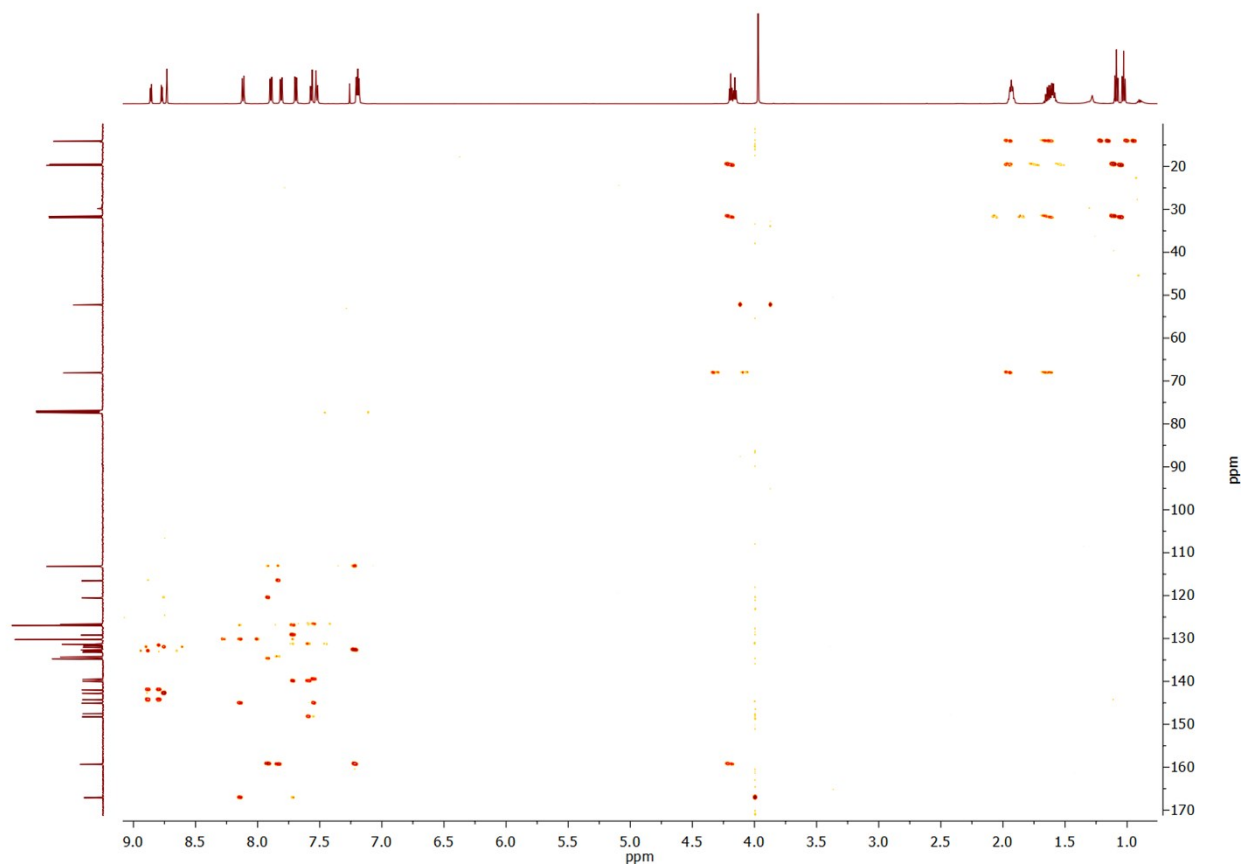

Figure S 111.  $^1\text{H}$ - $^{13}\text{C}$  HMBC spectrum of **9** ( $\text{CDCl}_3$ ).

### Spectral data of **10**

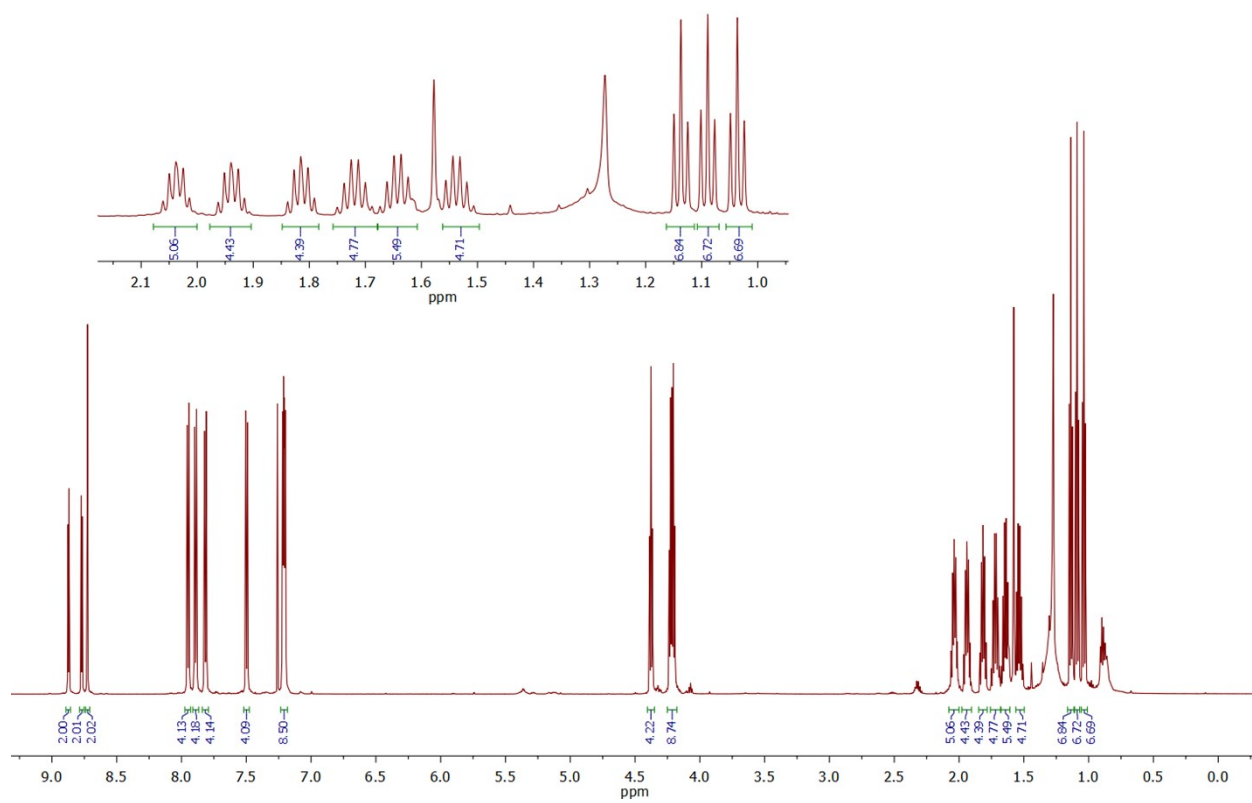

Figure S 112.  $^1\text{H}$ -NMR spectrum of **10** ( $\text{CDCl}_3$ ).

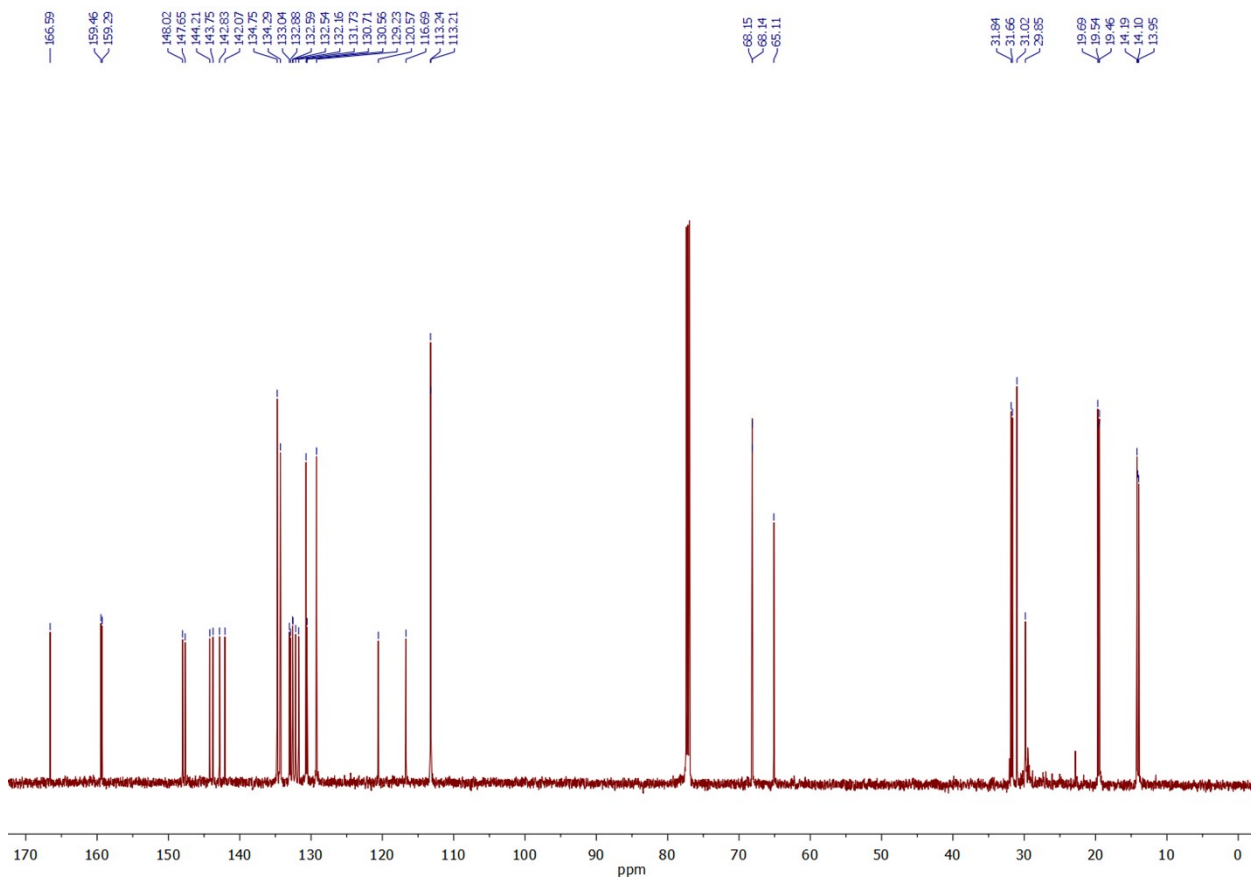

Figure S 113.  $^{13}\text{C}$ -NMR spectrum of **10** ( $\text{CDCl}_3$ ).

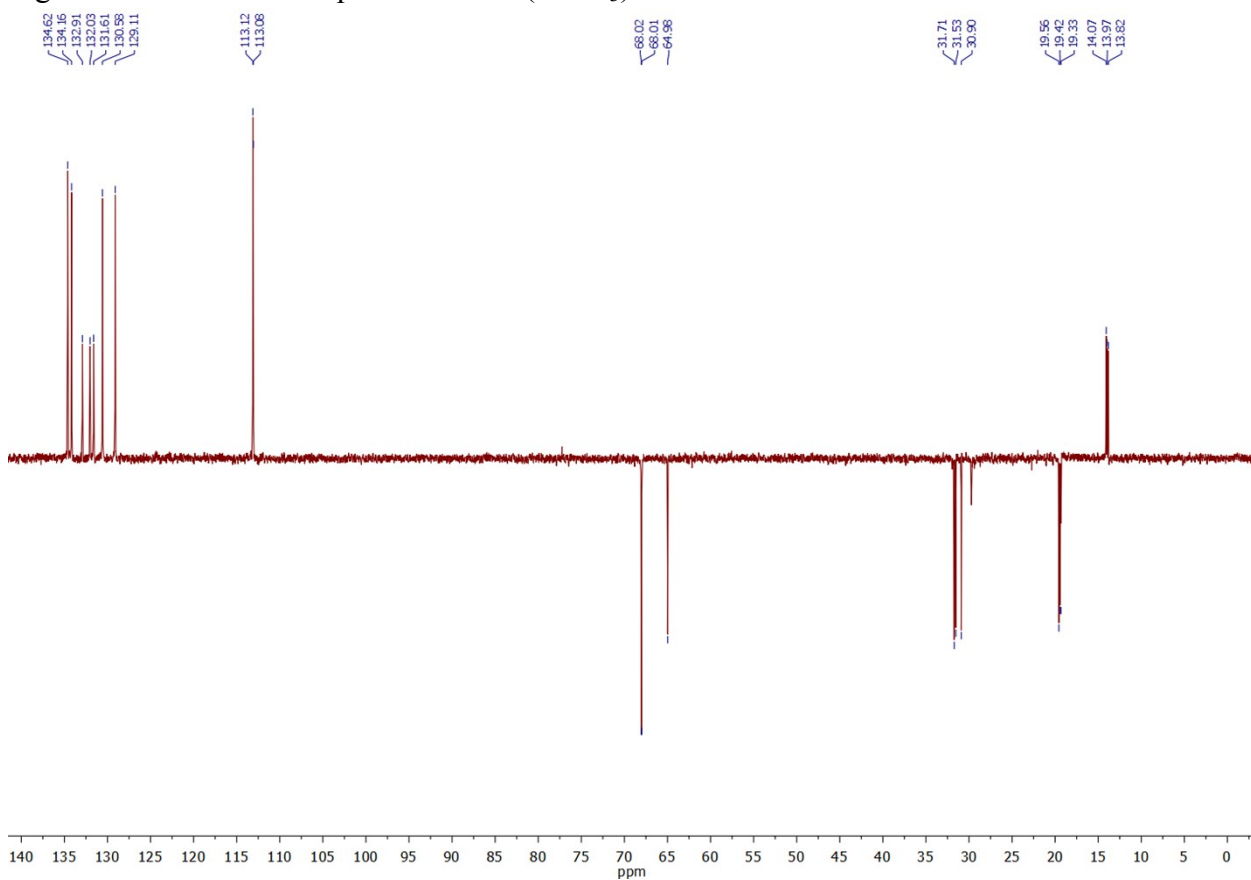

Figure S 114.  $^{13}\text{C}$  DEPT-135 spectrum of **10** ( $\text{CDCl}_3$ ).

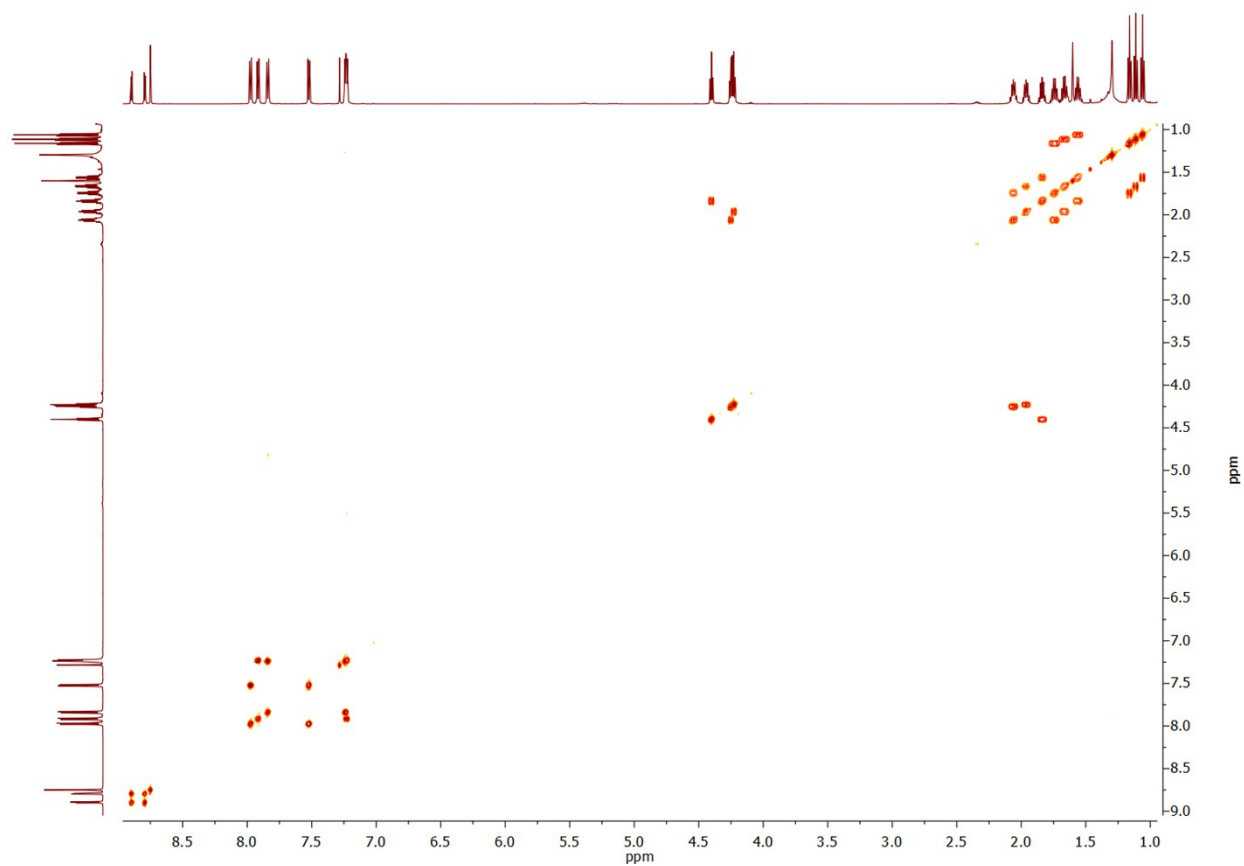

Figure S 115. COSY spectrum of **10** (CDCl<sub>3</sub>).

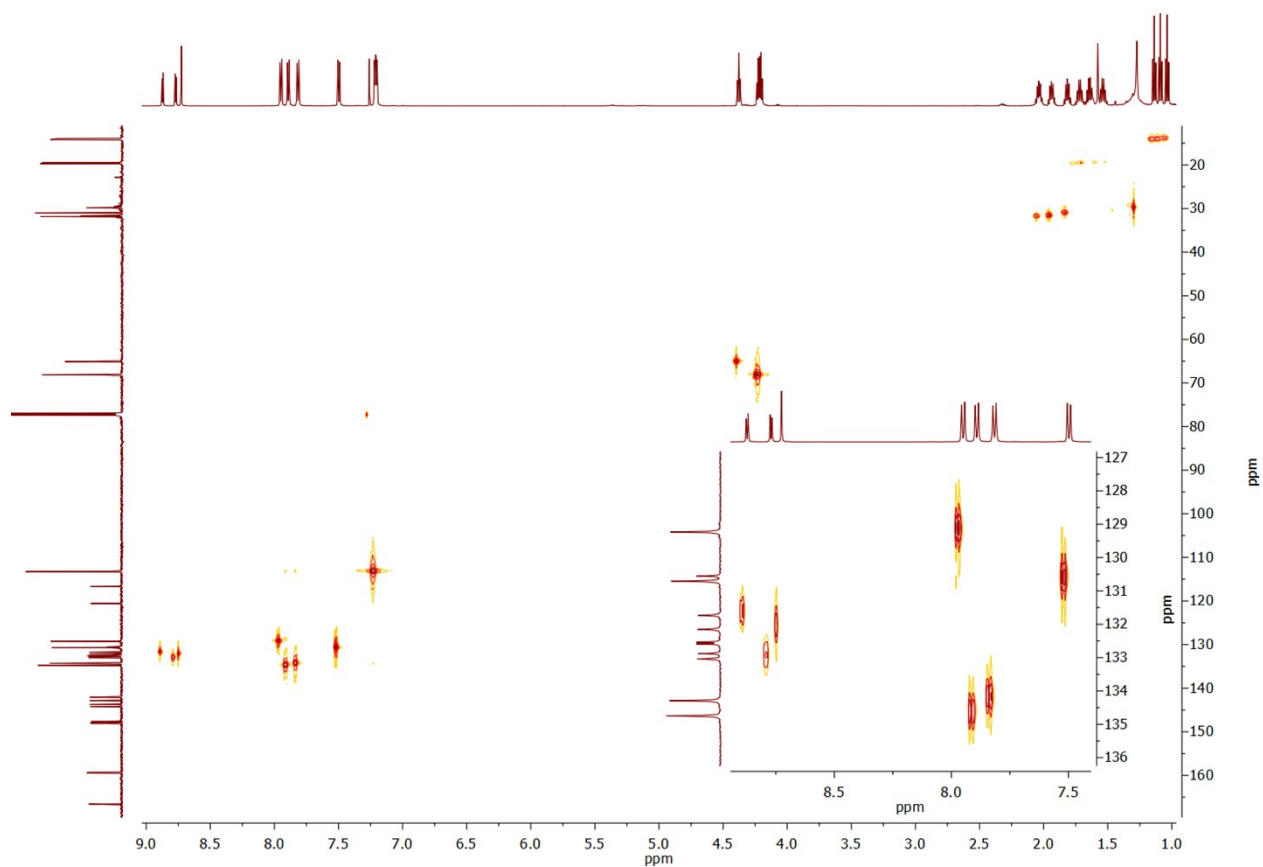

Figure S 116. <sup>1</sup>H-<sup>13</sup>C HSQC spectrum of **10** (CDCl<sub>3</sub>).

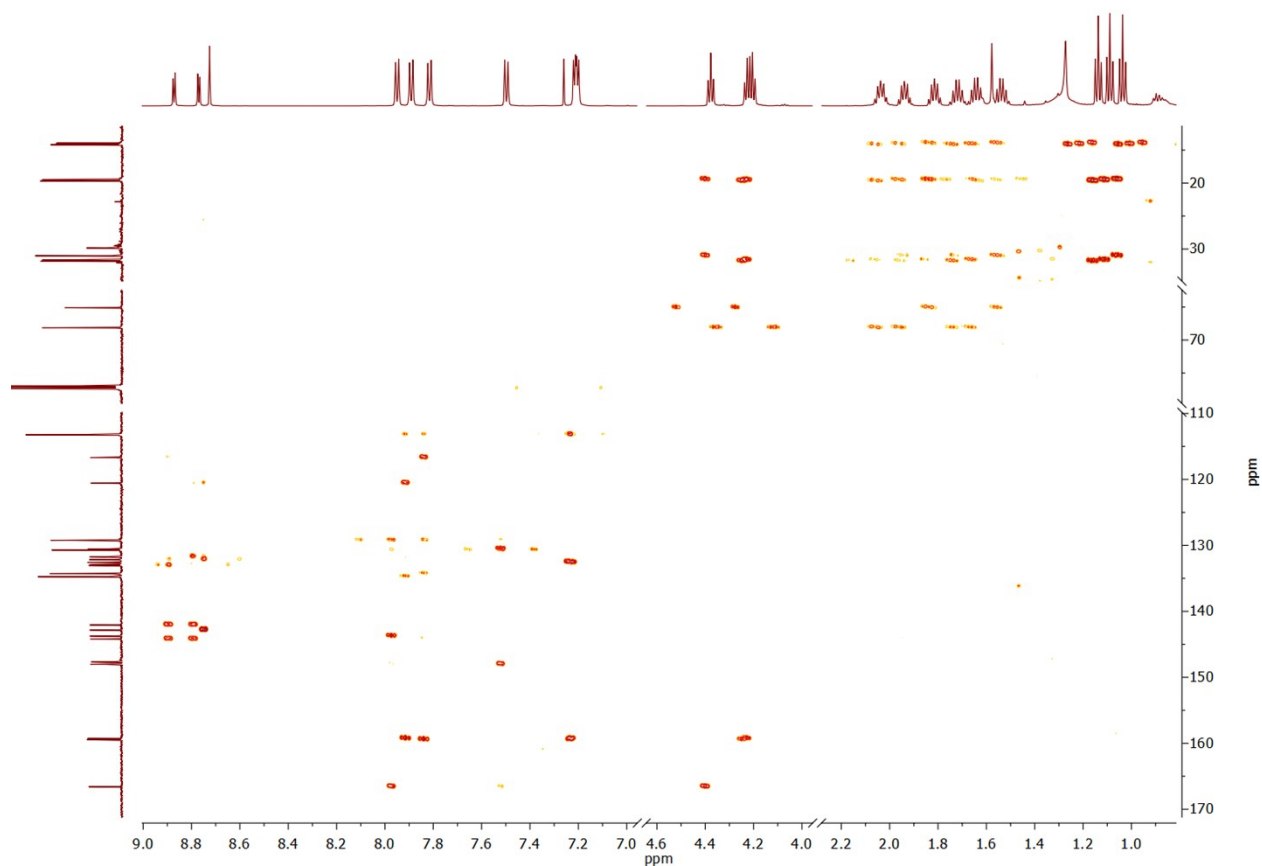

Figure S 117.  $^1\text{H}$ - $^{13}\text{C}$  HMBC spectrum of **10** ( $\text{CDCl}_3$ ).

### Spectral data of **11**

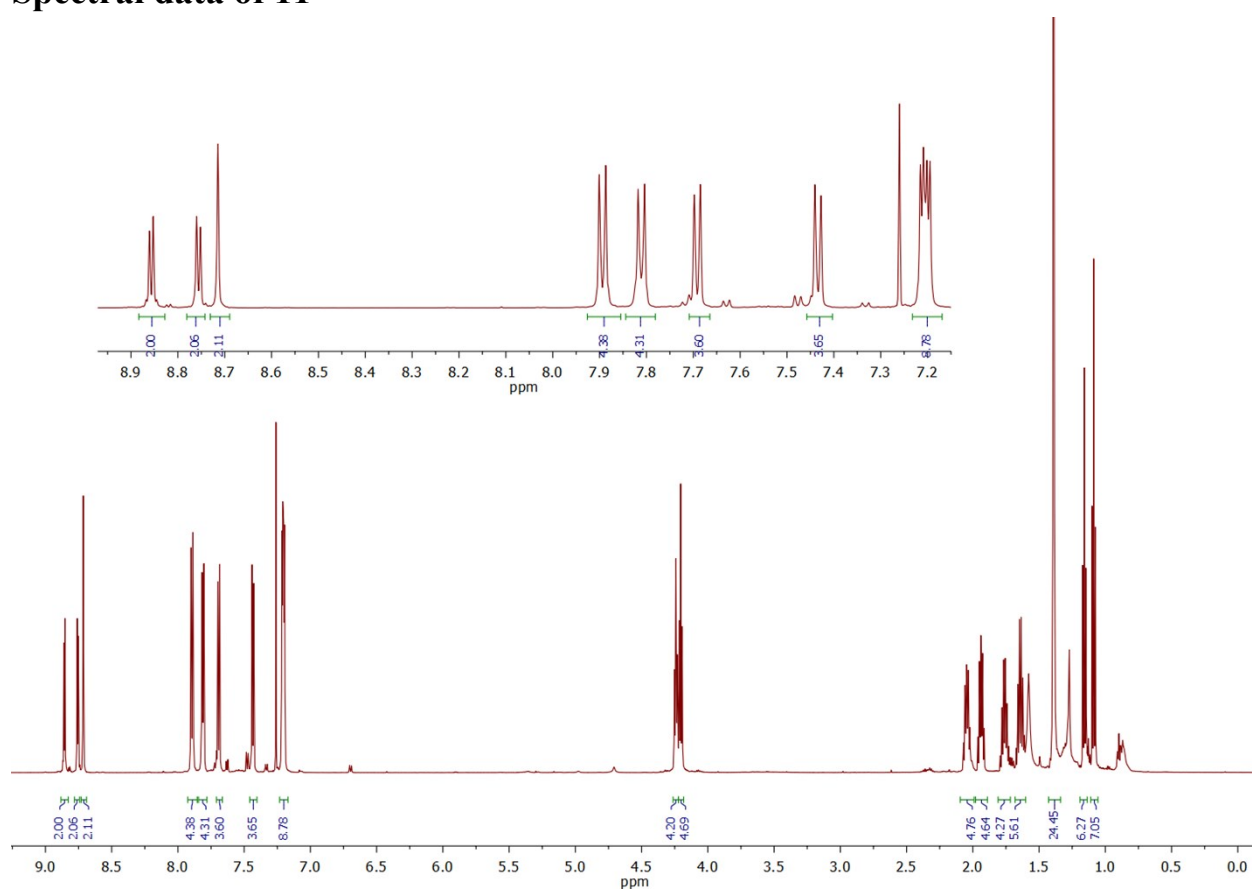

Figure S 118.  $^1\text{H}$ -NMR spectrum of **11** ( $\text{CDCl}_3$ ).

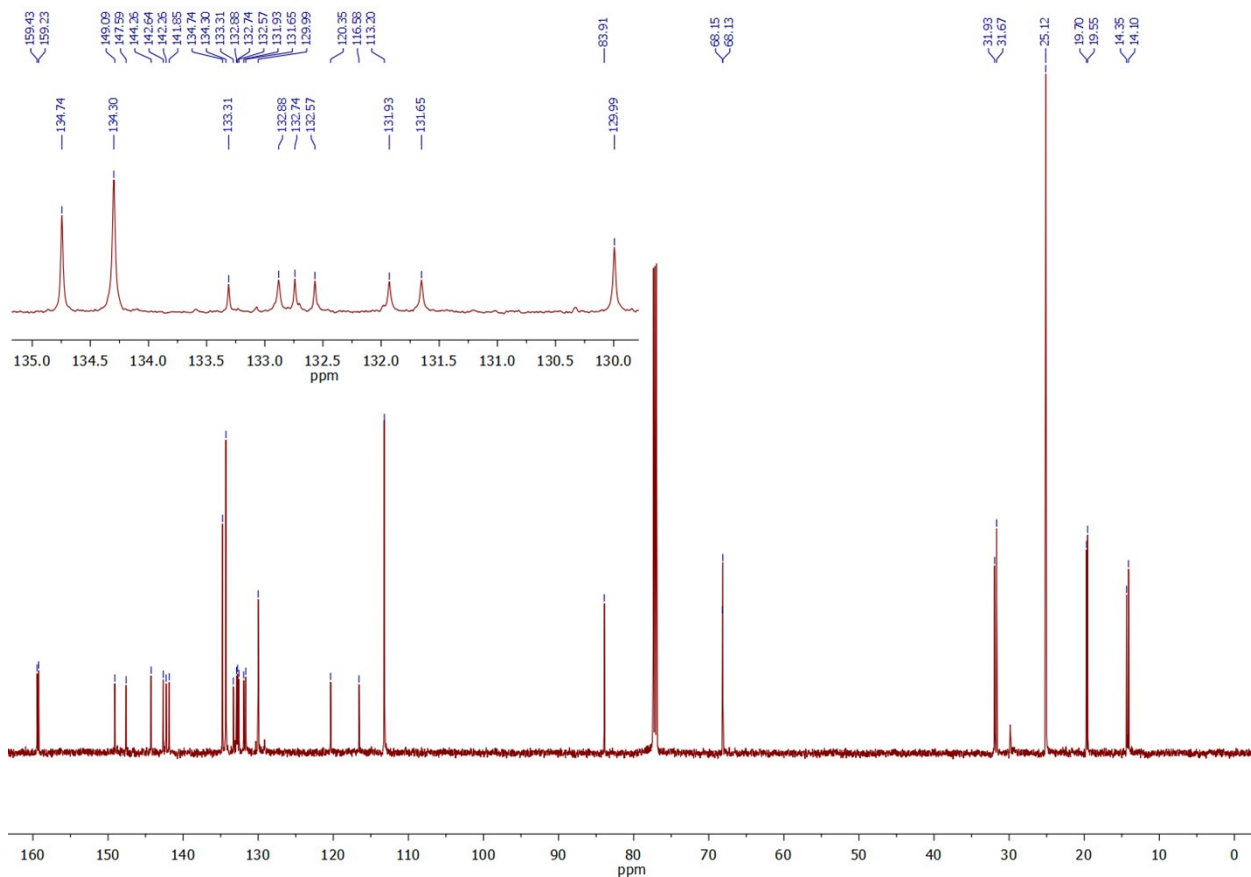

Figure S 119.  $^{13}\text{C}$ -NMR spectrum of **11** ( $\text{CDCl}_3$ ).

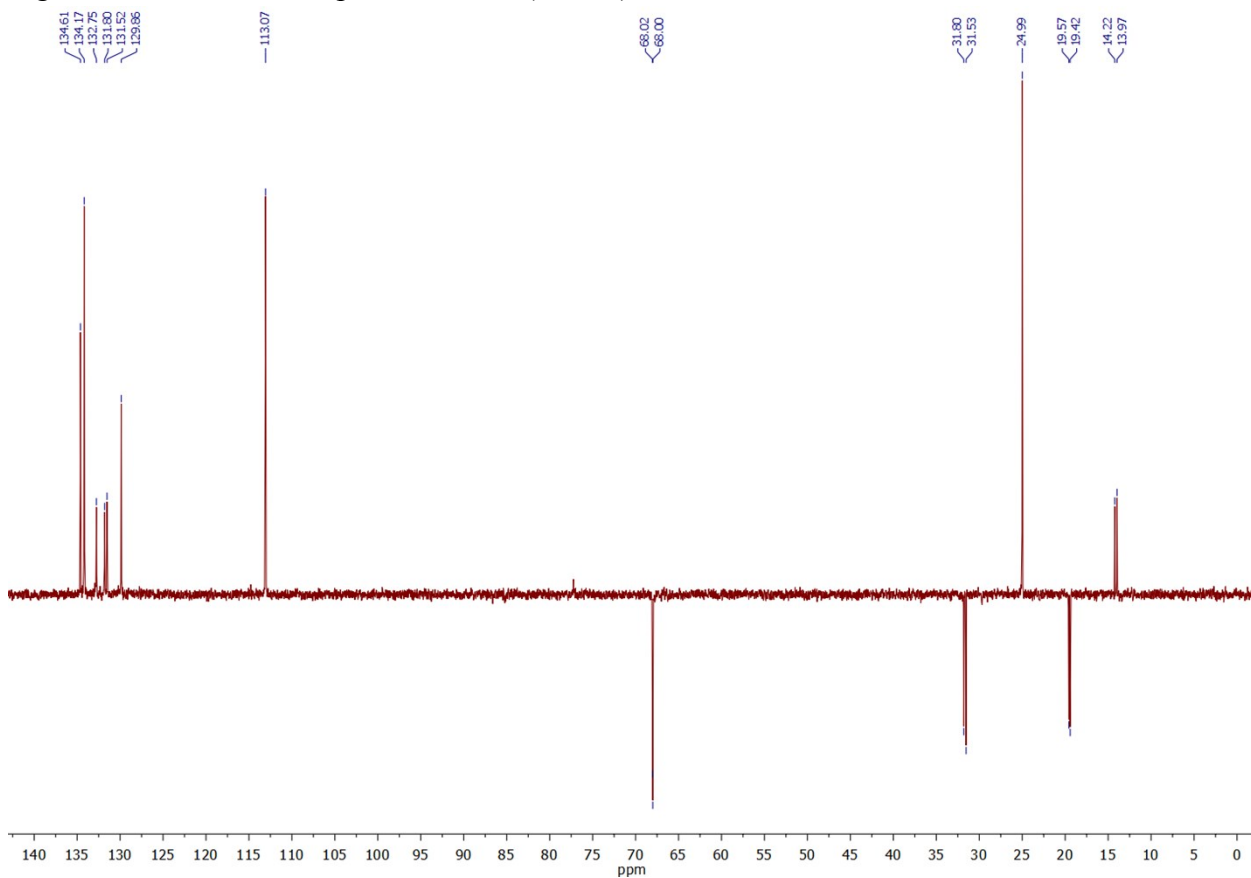

Figure S 120.  $^{13}\text{C}$  DEPT-135 spectrum of **11** ( $\text{CDCl}_3$ ).

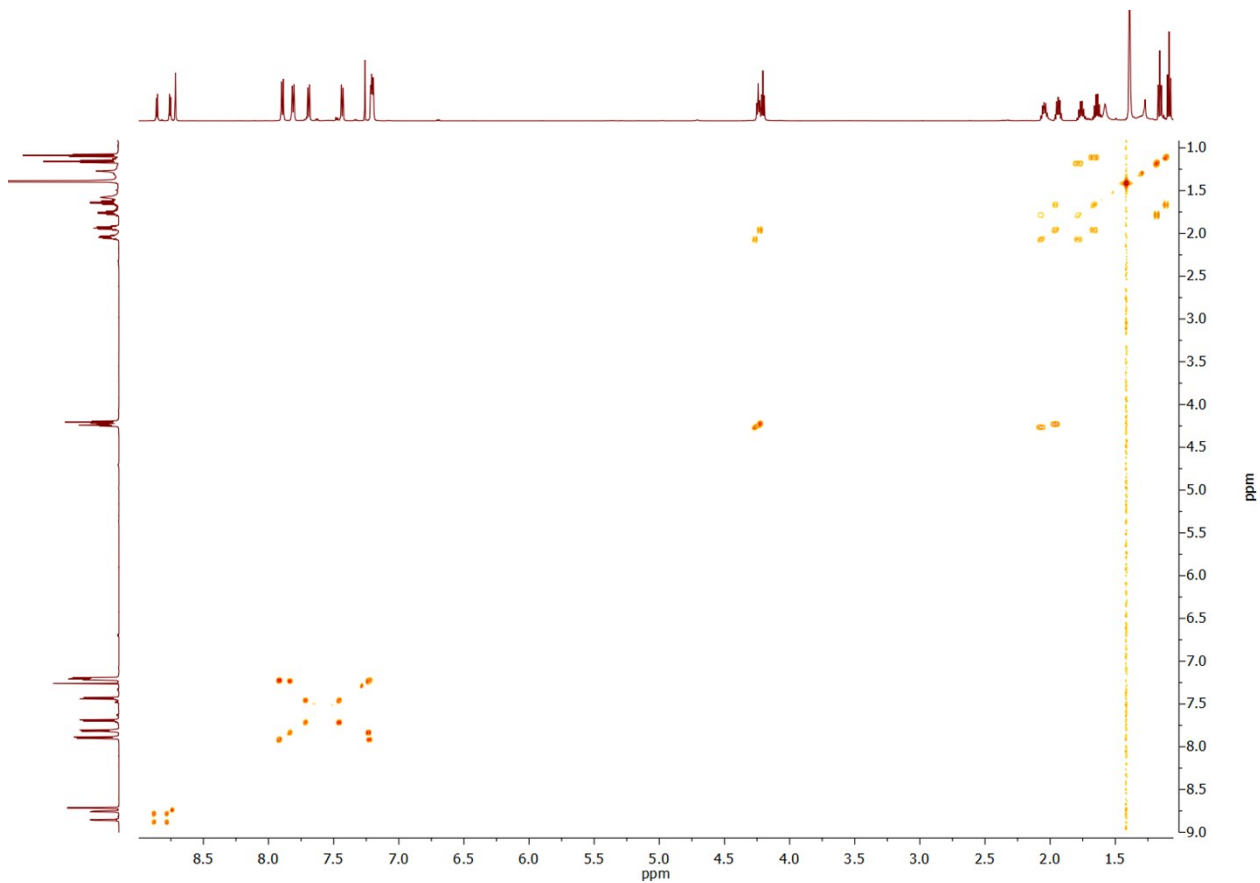

Figure S 121. COSY spectrum of **11** (CDCl<sub>3</sub>).

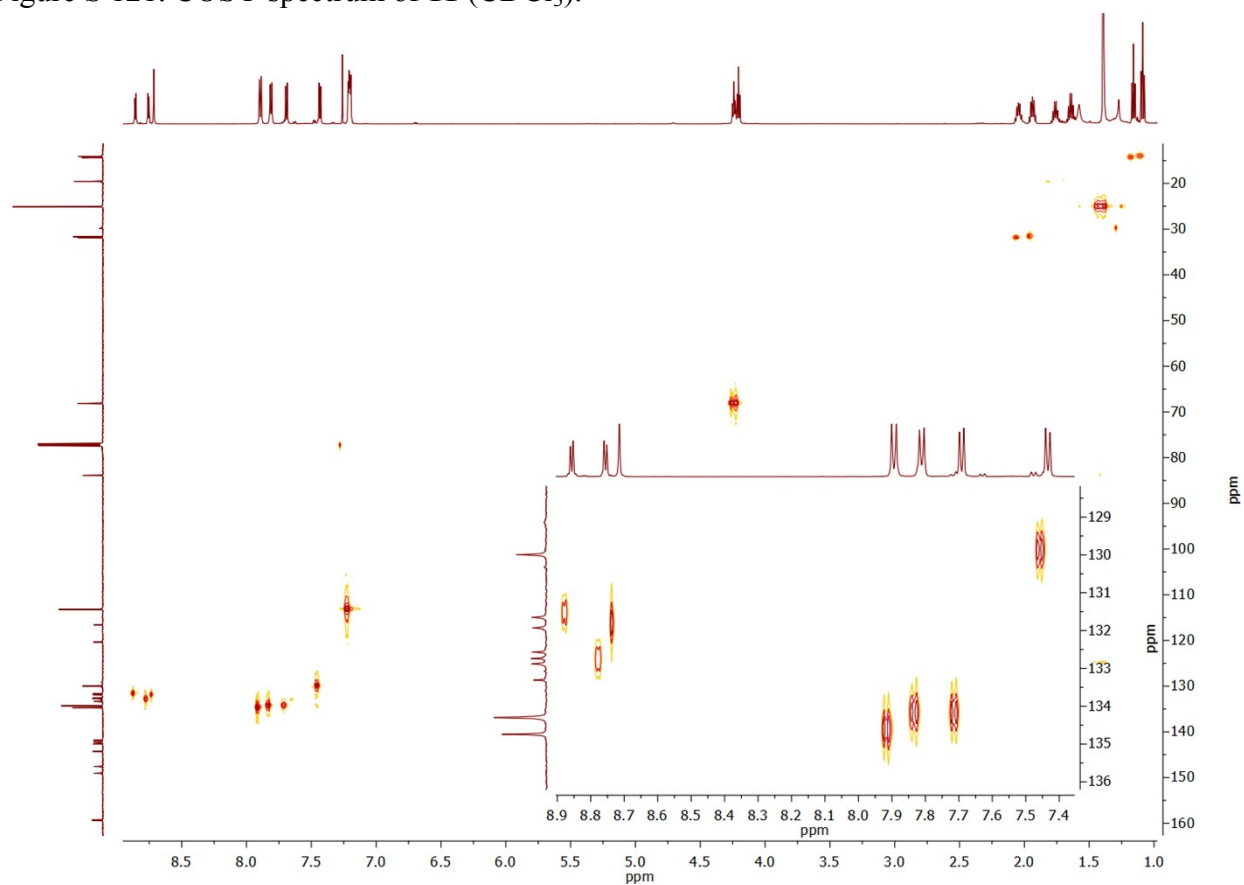

Figure S 122. <sup>1</sup>H-<sup>13</sup>C HSQC spectrum of **11** (CDCl<sub>3</sub>).

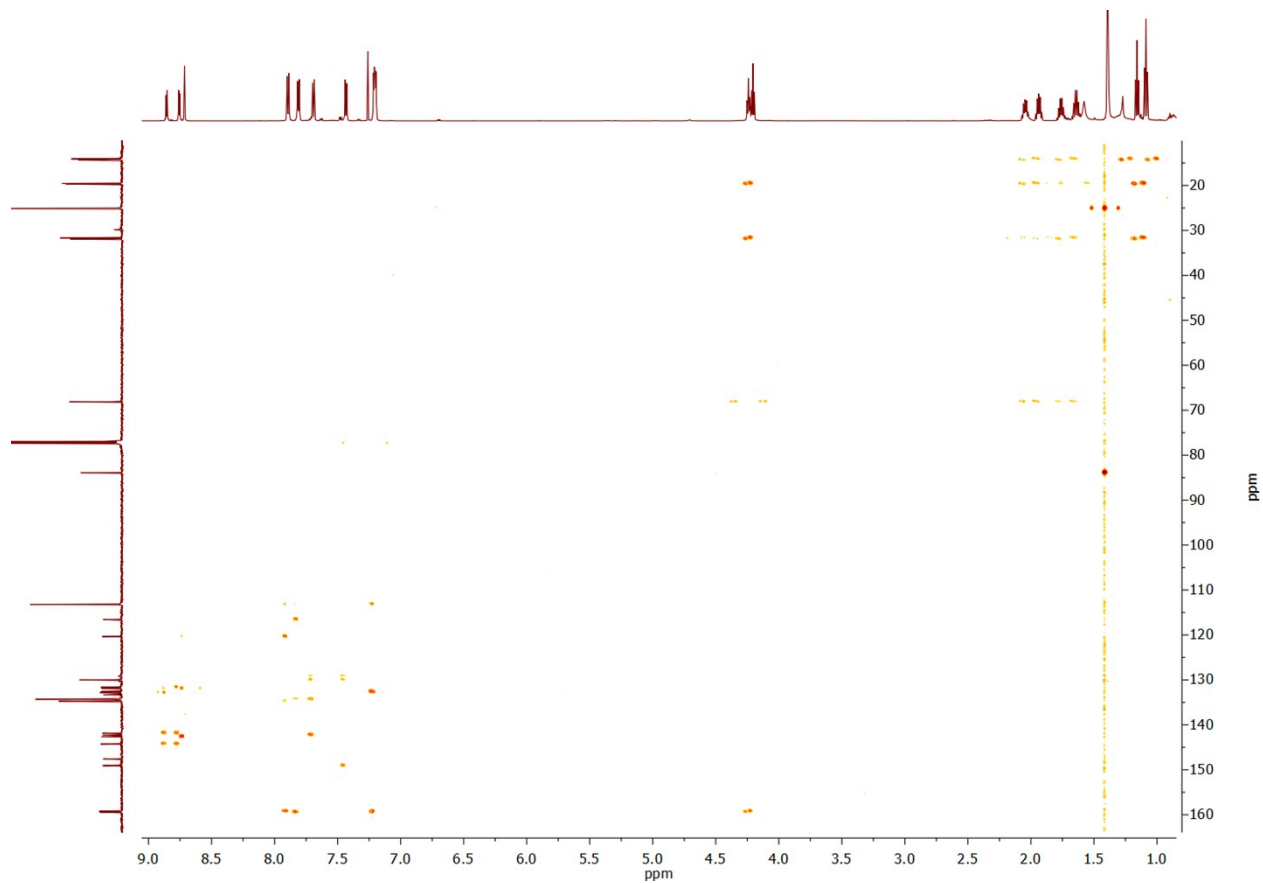

Figure S 123.  $^1\text{H}$ - $^{13}\text{C}$  HMBC spectrum of **11** ( $\text{CDCl}_3$ ).
